# Supplementary material for: Iron-catalyzed clean dehydrogenative coupling of alcohols with P(O)–H compounds: a new protocol for ROH phosphorylation
Source: Royal Society of Chemistry journal article supplement (doi:10.1039/c6dt02236g), 2016-01-01
Supplement: c6dt02236g1.pdf [file c6dt02236g1.pdf]

## *Supporting Information*

# **Iron-Catalyzed Clean Dehydrogenative Coupling of Alcohols with P(O)-H Compounds: a New Protocol for ROH Phosphorylation**

Chunya Li,<sup>†</sup> Tieqiao Chen,<sup>\*†</sup> and Li-Biao Han<sup>\*‡</sup>

<sup>†</sup>State Key Laboratory of Chemo/Biosensing and Chemometrics, College of Chemistry and Chemical Engineering, Hunan University, Changsha 410082, China, and <sup>‡</sup>National Institute of Advanced Industrial Science and Technology (AIST), Tsukuba, Ibaraki 305-8565, Japan

E-mail: [chentieqiao@hnu.edu.cn](mailto:chentieqiao@hnu.edu.cn); [libiao-han@aist.go.jp](mailto:libiao-han@aist.go.jp)

## **Table of Contents**

|                                                                                                                                                    |         |
|----------------------------------------------------------------------------------------------------------------------------------------------------|---------|
| <b>1. General information</b>                                                                                                                      | S2      |
| <b>2. Typical procedure for the iron-catalyzed cross dehydrogenative coupling of P(O)-H compounds with alcohols</b>                                | S2      |
| <b>3. Detection of dihydrogen generated in the iron-catalyzed cross dihydrogen coupling of diphenylphosphine oxide with 2-phenylethanol by GC.</b> | S3      |
| <b>4. Characterization and analytical data of products 3</b>                                                                                       | S3-S15  |
| <b>5. References</b>                                                                                                                               | S16     |
| <b>6. Copies of <sup>1</sup>H NMR, <sup>13</sup>C NMR and <sup>31</sup>P NMR spectra</b>                                                           | S17-end |

## 1. General information

All reactions were carried out in oven-dried Schlenk tubes under N<sub>2</sub> atmosphere. Dry solvents were obtained by purification according to standard methods. Reagents were used as received unless otherwise noted. Column chromatography was performed using Silica Gel 60 (particle size 37–54 μm). The pure products were obtained by means of column chromatography. <sup>1</sup>H NMR, <sup>13</sup>C NMR and <sup>31</sup>P NMR data were acquired on a Bruker-400 spectrometer (400 MHz for <sup>1</sup>H, 100 MHz for <sup>13</sup>C, and 162 MHz for <sup>31</sup>P NMR spectroscopy). Chemical shifts for <sup>1</sup>H NMR are referred to internal Me<sub>4</sub>Si (0 ppm) and reported as follows: chemical shift (δ ppm), multiplicity, coupling constant (Hz) and integration. Data for <sup>31</sup>P NMR were relative to H<sub>3</sub>PO<sub>4</sub> (85% solution in D<sub>2</sub>O, 0 ppm). HRMS were conducted in the Analytical Center at Hunan University, China.

## 2. Typical procedure for the iron-catalyzed cross dehydrogenative coupling of P(O)-H compounds with alcohols

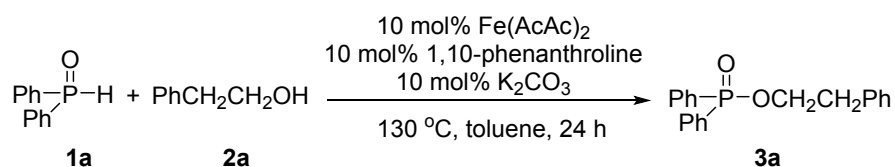

Under the dinitrogen atmosphere (1 atm), 0.24 mmol 2-phenylethanol **2a**, 0.2 mmol diphenylphosphine oxide **1a**, 10 mol% Fe(AcAc)<sub>2</sub>, 10 mol% 1,10-phenanthroline, 10% K<sub>2</sub>CO<sub>3</sub> and 1 mL toluene were charged into a 25 mL sealed tube and the mixture was heated at 130 °C until the starting material was consumed (ca. 24 hours). After removal of the volatiles in vacuum, the residues were passed through a short silica chromatography (particle size 37-54 μm, ethyl acetate/pether as eluent) to afford analytically pure **3a** in 95% isolated yield.

### 3. Detection of dihydrogen generated in the iron-catalyzed cross dihydrogenative coupling of diphenylphosphine oxide with 2-phenylethanol by GC.

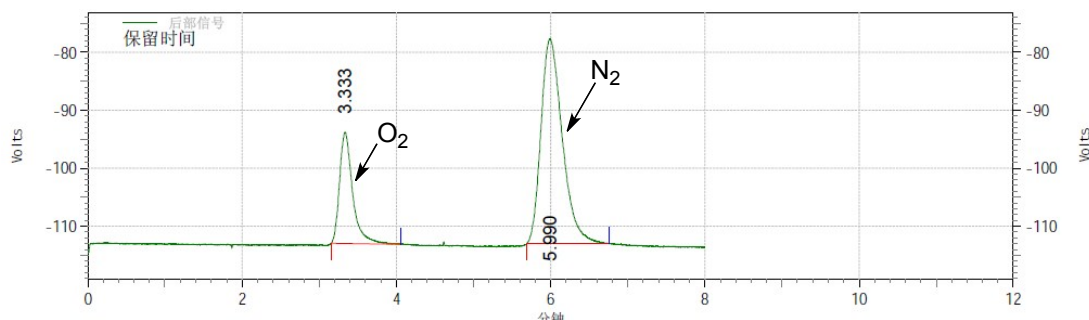

The reference (air)

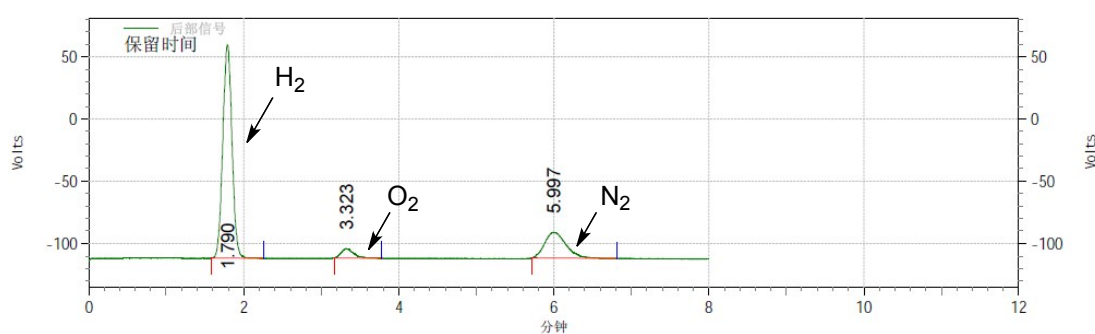

Sample of the reaction after 24 h

Agilent Technologies 7820A GC system, TCD detector, AE.5A column, oven temperature: 50 °C, carrier: Ar, 45 mL/min. The pick time was checked by standard samples.

### 4. Characterization and analytical data of products 3

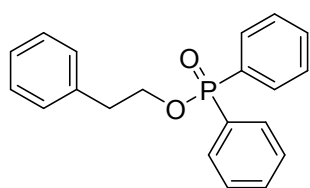

**Phenethyl diphenylphosphinate (3a).**<sup>11</sup> White solid; <sup>1</sup>H NMR (400 MHz CDCl<sub>3</sub>):  $\delta$  7.73-7.68 (m, 4H), 7.45 (t,  $J = 7.6$  Hz, 2H), 7.39-7.35 (m, 4H), 7.29-7.17 (m, 5H), 4.21 (dt,  $J = 7.2$  Hz, 7.2 Hz, 2H), 3.02 (t,  $J = 7.2$  Hz, 2H). <sup>13</sup>C NMR (100 MHz CDCl<sub>3</sub>):  $\delta$  137.5, 132.1 (d,  $J_{C-P} = 2.6$  Hz), 131.6 (d,  $J_{C-P} = 10.1$  Hz), 131.4 (d,  $J_{C-P} = 134.9$  Hz), 129.1, 128.5, 128.5 (d,  $J_{C-P} = 13.1$  Hz), 126.7, 85.4 (d,  $J_{C-P} = 5.9$  Hz), 37.1

(d,  $J_{C-P} = 6.9$  Hz).  $^{31}\text{P}$  NMR (162 MHz  $\text{CDCl}_3$ ):  $\delta$  31.46.

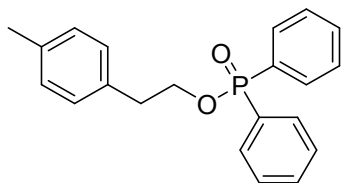

**4-Methylphenethyl diphenylphosphinate (3b).** White solid; m.p.: 60.3–61.2 °C;  $^1\text{H}$  NMR (400 MHz  $\text{CDCl}_3$ ):  $\delta$  7.73-7.69 (m, 4H), 7.48 (t,  $J = 7.6$  Hz, 2H), 7.41-7.37 (m, 4H), 7.09 (b, 4H), 4.19 (dt,  $J = 6.8$  Hz, 6.8 Hz, 2H), 3.00 (t,  $J = 6.8$  Hz, 2H), 2.32 (s, 3H).  $^{13}\text{C}$  NMR (100 MHz  $\text{CDCl}_3$ ):  $\delta$  136.2, 134.4, 132.1 (d,  $J_{C-P} = 2.8$  Hz), 131.6 (d,  $J_{C-P} = 10.1$  Hz), 131.5 (d,  $J_{C-P} = 136.2$  Hz), 129.2, 129.0, 128.5 (d,  $J_{C-P} = 13.0$  Hz), 65.6 (d,  $J_{C-P} = 6.0$  Hz), 36.7 (d,  $J_{C-P} = 6.8$  Hz).  $^{31}\text{P}$  NMR (162 MHz  $\text{CDCl}_3$ ):  $\delta$  31.46.  $\text{C}_{21}\text{H}_{21}\text{O}_2\text{P}$ . HRMS: Cal. 336.1279. Found 335.1183 (M-H).

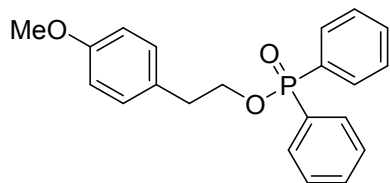

**4-Methoxyphenethyl diphenylphosphinate (3c).** Colorless oil;  $^1\text{H}$  NMR (400 MHz  $\text{CDCl}_3$ ):  $\delta$  7.74-7.69 (m, 4H), 7.49 (t,  $J = 7.6$  Hz, 2H), 7.43-7.38 (m, 4H), 7.11 (d,  $J = 8.4$  Hz, 2H), 6.82 (d,  $J = 8.4$  Hz, 2H), 4.18 (dt,  $J = 7.2$  Hz, 7.2 Hz, 2H), 3.79 (s, 3H), 2.98 (t,  $J = 7.2$  Hz, 2H).  $^{13}\text{C}$  NMR (100 MHz  $\text{CDCl}_3$ ):  $\delta$  158.4, 132.1 (d,  $J_{C-P} = 2.8$  Hz), 131.6 (d,  $J_{C-P} = 10.0$  Hz), 131.5 (d,  $J_{C-P} = 136.1$  Hz), 130.1, 129.5, 128.5 (d,  $J_{C-P} = 13.1$  Hz), 65.6 (d,  $J_{C-P} = 6.0$  Hz), 55.3, 36.2 (d,  $J_{C-P} = 6.8$  Hz).  $^{31}\text{P}$  NMR (162 MHz  $\text{CDCl}_3$ ):  $\delta$  31.45.  $\text{C}_{21}\text{H}_{21}\text{O}_3\text{P}$ . HRMS: Cal. 352.1228. Found 352.1206.

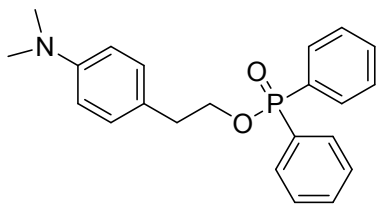

**4-(dimethylamino)phenethyl diphenylphosphinate (3d).** Yellow solid; m.p.: 111.8–112.7 °C;  $^1\text{H}$  NMR (400 MHz  $\text{CDCl}_3$ ):  $\delta$  7.76–7.71 (m, 4H), 7.50–7.38 (m, 6H), 7.07 (d,  $J = 8.5$  Hz, 2H), 6.68 (d,  $J = 8.5$  Hz, 2H), 4.16 (dt,  $J = 6.8$  Hz, 6.8 Hz, 2H), 2.95 (t,  $J = 6.8$  Hz, 2H), 2.92 (s, 6H).  $^{13}\text{C}$  NMR (100 MHz  $\text{CDCl}_3$ ):  $\delta$  149.6, 132.0 (d,  $J_{\text{C-P}} = 2.8$  Hz), 131.4, 131.4 (d,  $J_{\text{C-P}} = 10.1$  Hz), 131.1 (d,  $J_{\text{C-P}} = 136.1$  Hz), 130.7, 128.4 (d,  $J_{\text{C-P}} = 13.1$  Hz), 120.4, 64.8 (d,  $J_{\text{C-P}} = 6.0$  Hz), 36.3 (d,  $J_{\text{C-P}} = 6.8$  Hz).  $^{31}\text{P}$  NMR (162 MHz  $\text{CDCl}_3$ ):  $\delta$  31.28.  $\text{C}_{22}\text{H}_{24}\text{NO}_2\text{P}$ . HRMS: Cal. 365.1539. Found 365.1525.

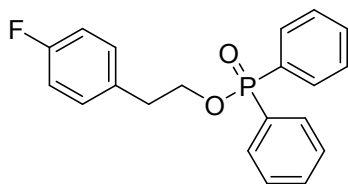

**4-Fluorophenethyl diphenylphosphinate (3e).** Colorless oil;  $^1\text{H}$  NMR (400 MHz  $\text{CDCl}_3$ ):  $\delta$  7.72–7.67 (m, 4H), 7.51–7.47 (m, 2H), 7.42–7.39 (m, 4H), 7.15 (dd,  $J = 6.4$  Hz, 6.4 Hz, 2H), 6.97 (dd,  $J = 8.4$  Hz, 8.4 Hz, 2H), 4.19 (dt,  $J = 6.8$  Hz, 6.8 Hz, 2H), 3.00 (t,  $J = 6.8$  Hz, 2H).  $^{13}\text{C}$  NMR (100 MHz  $\text{CDCl}_3$ ):  $\delta$  161.8 (d,  $J_{\text{C-F}} = 243.0$  Hz), 133.2 (d,  $J_{\text{C-F}} = 3.2$  Hz), 132.2 (d,  $J_{\text{C-P}} = 2.8$  Hz), 131.6 (d,  $J_{\text{C-P}} = 10.1$  Hz), 131.3 (d,  $J_{\text{C-P}} = 136.1$  Hz), 130.5 (d,  $J_{\text{C-F}} = 7.9$  Hz), 128.5 (d,  $J_{\text{C-P}} = 13.0$  Hz), 65.3 (d,  $J_{\text{C-P}} = 6.0$  Hz), 36.3 (d,  $J_{\text{C-P}} = 6.8$  Hz).  $^{31}\text{P}$  NMR (162 MHz  $\text{CDCl}_3$ ):  $\delta$  31.72.  $\text{C}_{20}\text{H}_{18}\text{FO}_2\text{P}$ . HRMS: Cal. 340.1028. Found 340.1006.

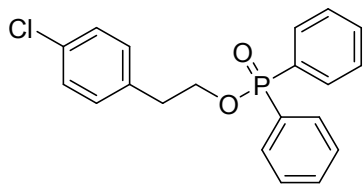

**4-Chlorophenethyl diphenylphosphinate (3f).** Yellow solid; m.p.: 65.2–66.3 °C;  $^1\text{H}$  NMR (400 MHz  $\text{CDCl}_3$ ):  $\delta$  7.63–7.58 (m, 4H), 7.41 (t,  $J = 7.2$  Hz, 2H), 7.34–7.32 (m, 4H), 7.17 (d,  $J = 8.0$  Hz, 2H), 7.04 (d,  $J = 8.0$  Hz, 2H), 4.12 (dt,  $J = 6.8$  Hz, 6.8 Hz, 2H), 2.91 (t,  $J = 6.8$  Hz, 2H).  $^{13}\text{C}$  NMR (100 MHz  $\text{CDCl}_3$ ):  $\delta$  135.0, 131.4, 132.1 (d,  $J_{\text{C-P}} = 2.7$  Hz), 130.5 (d,  $J_{\text{C-P}} = 10.1$  Hz), 130.2 (d,  $J_{\text{C-P}} = 136.2$  Hz), 129.4, 127.6, 127.5 (d,  $J_{\text{C-P}} = 12.7$  Hz), 64.0 (d,  $J_{\text{C-P}} = 5.8$  Hz), 35.4 (d,  $J_{\text{C-P}} = 6.8$  Hz).  $^{31}\text{P}$  NMR (162 MHz  $\text{CDCl}_3$ ):  $\delta$  31.82.

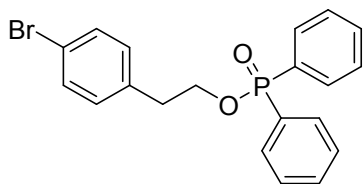

**4-Bromophenethyl diphenylphosphinate (3g).** Colorless oil;  $^1\text{H}$  NMR (400 MHz  $\text{CDCl}_3$ ):  $\delta$  7.71–7.66 (m, 4H), 7.49 (t,  $J = 7.2$  Hz, 2H), 7.42–7.37 (m, 6H), 7.06 (d,  $J = 8.0$  Hz, 2H), 4.19 (dt,  $J = 6.8$  Hz, 6.8 Hz, 2H), 2.97 (t,  $J = 6.8$  Hz, 2H).  $^{13}\text{C}$  NMR (100 MHz  $\text{CDCl}_3$ ):  $\delta$  136.6, 132.2 (d,  $J_{\text{C-P}} = 2.8$  Hz), 131.6 (d,  $J_{\text{C-P}} = 10.1$  Hz), 131.5, 131.3 (d,  $J_{\text{C-P}} = 136.1$  Hz), 130.9, 128.5 (d,  $J_{\text{C-P}} = 13.1$  Hz), 120.5, 64.9 (d,  $J_{\text{C-P}} = 6.0$  Hz), 36.5 (d,  $J_{\text{C-P}} = 6.8$  Hz).  $^{31}\text{P}$  NMR (162 MHz  $\text{CDCl}_3$ ):  $\delta$  31.77.

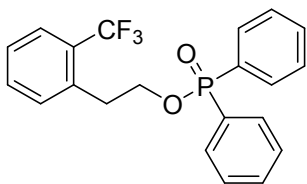

**2-(Trifluoromethyl)phenethyl diphenylphosphinate (3h).** Colorless oil;  $^1\text{H}$  NMR

(400 MHz CDCl<sub>3</sub>):  $\delta$  7.77-7.72 (m, 4H), 7.62 (d,  $J = 7.6$  Hz, 1H), 7.52-7.30 (m, 9H), 4.24 (dt,  $J = 7.2$  Hz, 7.2 Hz, 2H), 3.25 (t,  $J = 7.2$  Hz, 2H). <sup>13</sup>C NMR (100 MHz CDCl<sub>3</sub>):  $\delta$  135.8 (b), 132.2 (d,  $J_{C-P} = 2.8$  Hz), 132.1 (b), 131.7 (b), 131.6 (d,  $J_{C-P} = 10.1$  Hz), 131.2 (d,  $J_{C-P} = 136.2$  Hz), 129.0 (q,  $J_{C-F} = 29.6$  Hz), 128.5 (d,  $J_{C-P} = 13.0$  Hz), 126.9, 126.1 (q,  $J_{C-F} = 5.7$  Hz), 124.4 (q,  $J_{C-F} = 272.2$  Hz), 64.7 (d,  $J_{C-P} = 4.9$  Hz), 33.8 (db,  $J_{C-P} = 8.4$  Hz). <sup>31</sup>P NMR (162 MHz CDCl<sub>3</sub>):  $\delta$  32.05. C<sub>21</sub>H<sub>18</sub>F<sub>3</sub>O<sub>2</sub>P. HRMS: Cal. 390.0997. Found 390.0980.

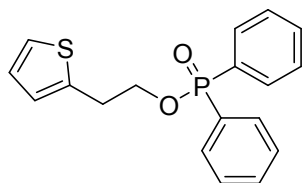

**2-(Thiophen-2-yl)ethyl diphenylphosphinate (3i).** Colorless oil; <sup>1</sup>H NMR (400 MHz CDCl<sub>3</sub>):  $\delta$  7.79-7.74 (m, 4H), 7.49 (t,  $J = 7.6$  Hz, 2H), 7.43-7.39 (m, 4H), 7.15 (d,  $J = 4.8$  Hz, 1H), 6.93 (dd,  $J = 3.6$  Hz, 4.8 Hz, 1H), 6.85 (d,  $J = 3.6$  Hz, 1H), 4.22 (dt,  $J = 6.4$  Hz, 6.4 Hz, 2H), 3.24 (t,  $J = 6.4$  Hz, 2H). <sup>13</sup>C NMR (100 MHz CDCl<sub>3</sub>):  $\delta$  139.5, 132.2 (d,  $J_{C-P} = 2.8$  Hz), 131.6 (d,  $J_{C-P} = 10.2$  Hz), 131.3 (d,  $J_{C-P} = 136.1$  Hz), 128.6 (d,  $J_{C-P} = 13.1$  Hz), 126.9, 125.9, 124.1, 65.0 (d,  $J_{C-P} = 5.9$  Hz), 31.3 (d,  $J_{C-P} = 7.1$  Hz). <sup>31</sup>P NMR (162 MHz CDCl<sub>3</sub>):  $\delta$  31.86. C<sub>18</sub>H<sub>17</sub>O<sub>2</sub>PS. HRMS: Cal. 328.0687. Found 328.0670.

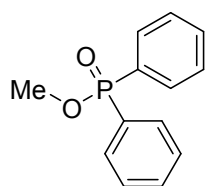

**Methyl diphenylphosphinate (3j)**<sup>12</sup>. Colorless oil; <sup>1</sup>H NMR (400 MHz CDCl<sub>3</sub>):  $\delta$

7.76-7.71 (m, 4H), 7.46-7.35 (m, 6H), 3.69 (d,  $J = 11.2$  Hz, 2H).  $^{13}\text{C}$  NMR (100 MHz  $\text{CDCl}_3$ ):  $\delta$  132.2 (d,  $J_{\text{C-P}} = 2.7$  Hz), 131.7 (d,  $J_{\text{C-P}} = 10.0$  Hz), 131.0 (d,  $J_{\text{C-P}} = 138.5$  Hz), 51.6 (d,  $J_{\text{C-P}} = 6.0$  Hz).  $^{31}\text{P}$  NMR (162 MHz  $\text{CDCl}_3$ ):  $\delta$  33.29.

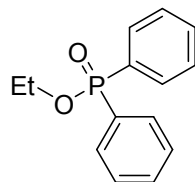

**Ethyl diphenylphosphinate (3k).**<sup>13</sup> Colorless oil;  $^1\text{H}$  NMR (400 MHz  $\text{CDCl}_3$ ):  $\delta$  7.85-7.79 (m, 4H), 7.52-7.42 (m, 6H), 4.11 (dq,  $J = 7.2$  Hz, 7.2 Hz, 2H), 1.36 (t,  $J = 7.2$  Hz, 3H).  $^{13}\text{C}$  NMR (100 MHz  $\text{CDCl}_3$ ):  $\delta$  132.1 (d,  $J_{\text{C-P}} = 2.8$  Hz), 131.6 (d,  $J_{\text{C-P}} = 136.3$  Hz), 131.6 (d,  $J_{\text{C-P}} = 10.0$  Hz), 128.5 (d,  $J_{\text{C-P}} = 13.0$  Hz), 61.1 (d,  $J_{\text{C-P}} = 5.9$  Hz), 16.5 (d,  $J_{\text{C-P}} = 6.5$  Hz).  $^{31}\text{P}$  NMR (162 MHz  $\text{CDCl}_3$ ):  $\delta$  31.34.

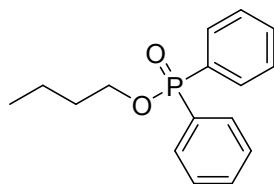

**n-Butyl diphenylphosphinate (3l).**<sup>12</sup> White solid;  $^1\text{H}$  NMR (400 MHz  $\text{CDCl}_3$ ):  $\delta$  7.83-7.79 (m, 4H), 7.53-7.42 (m, 6H), 4.03 (dt,  $J = 6.8$  Hz, 6.8 Hz, 2H), 1.74-1.67 (m, 2H), 1.48-1.39 (m, 2H), 0.91 (t,  $J = 7.2$  Hz, 3H).  $^{13}\text{C}$  NMR (100 MHz  $\text{CDCl}_3$ ):  $\delta$  132.1 (d,  $J_{\text{C-P}} = 2.8$  Hz), 131.7 (d,  $J_{\text{C-P}} = 136.4$  Hz), 131.6 (d,  $J_{\text{C-P}} = 10.0$  Hz), 128.5 (d,  $J_{\text{C-P}} = 13.0$  Hz), 64.7 (d,  $J_{\text{C-P}} = 6.1$  Hz), 32.6 (d,  $J_{\text{C-P}} = 6.6$  Hz), 18.9, 13.6.  $^{31}\text{P}$  NMR (162 MHz  $\text{CDCl}_3$ ):  $\delta$  31.12.

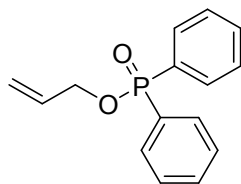

**Allyl diphenylphosphinate (3m).**<sup>13</sup> Colorless oil;  $^1\text{H}$  NMR (400 MHz  $\text{CDCl}_3$ ):  $\delta$



7.85-7.81 (m, 4H), 7.54-7.43 (m, 6H), 6.02-5.92 (m, 1H), 5.36 (d,  $J = 17.2$  Hz, 1H), 5.23 (d,  $J = 10.4$  Hz, 1H), 4.54 (dd,  $J = 6.4$  Hz, 6.4 Hz, 2H).  $^{13}\text{C}$  NMR (100 MHz  $\text{CDCl}_3$ ):  $\delta$  133.0 (d,  $J_{\text{C-P}} = 7.2$  Hz), 132.2 (d,  $J_{\text{C-P}} = 2.8$  Hz), 131.6 (d,  $J_{\text{C-P}} = 10.1$  Hz), 131.3 (d,  $J_{\text{C-P}} = 136.3$  Hz), 128.6 (d,  $J_{\text{C-P}} = 13.1$  Hz), 117.9, 65.4 (d,  $J_{\text{C-P}} = 5.4$  Hz).  $^{31}\text{P}$  NMR (162 MHz  $\text{CDCl}_3$ ):  $\delta$  32.28.

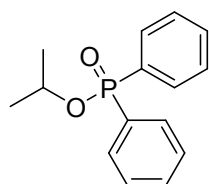

***i*-Propyl diphenylphosphinate (3n).**<sup>14</sup> White solid;  $^1\text{H}$  NMR (400 MHz  $\text{CDCl}_3$ ):  $\delta$  7.84-7.79 (m, 4H), 7.52-7.41 (m, 6H), 4.73-4.62 (m, 1H), 1.35 (d,  $J = 6.0$  Hz, 6H).  $^{13}\text{C}$  NMR (100 MHz  $\text{CDCl}_3$ ):  $\delta$  132.4 (d,  $J_{\text{C-P}} = 136.3$  Hz), 131.9 (d,  $J_{\text{C-P}} = 2.8$  Hz), 131.6 (d,  $J_{\text{C-P}} = 10.0$  Hz), 128.4 (d,  $J_{\text{C-P}} = 13.0$  Hz), 70.3 (d,  $J_{\text{C-P}} = 6.0$  Hz), 24.3 (d,  $J_{\text{C-P}} = 4.1$  Hz).  $^{31}\text{P}$  NMR (162 MHz  $\text{CDCl}_3$ ):  $\delta$  29.82.

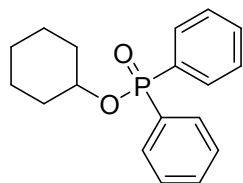

**Cyclohexyl diphenylphosphinate (3o).**<sup>15</sup> White solid;  $^1\text{H}$  NMR (400 MHz  $\text{CDCl}_3$ ):  $\delta$  7.84-7.79 (m, 4H), 7.51-7.41 (m, 6H), 4.47-4.38 (m, 1H), 1.91-1.88 (m, 2H), 1.75-1.72 (m, 2H), 1.65-1.56 (m, 2H), 1.48-1.43 (m, 1H), 1.34-1.22 (m, 3H).  $^{13}\text{C}$  NMR (100 MHz  $\text{CDCl}_3$ ):  $\delta$  132.6 (d,  $J_{\text{C-P}} = 136.4$  Hz), 131.9 (d,  $J_{\text{C-P}} = 2.8$  Hz), 131.6 (d,  $J_{\text{C-P}} = 10.0$  Hz), 128.4 (d,  $J_{\text{C-P}} = 13.0$  Hz), 74.9 (d,  $J_{\text{C-P}} = 6.2$  Hz), 33.9 (d,  $J_{\text{C-P}} = 3.7$  Hz), 25.2, 23.6.  $^{31}\text{P}$  NMR (162 MHz  $\text{CDCl}_3$ ):  $\delta$  29.66.

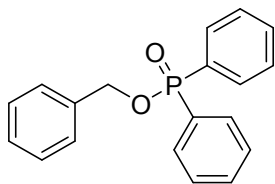

**Benzyl diphenylphosphinate (3p).**<sup>16</sup> White solid; <sup>1</sup>H NMR (400 MHz CDCl<sub>3</sub>):  $\delta$  7.76-7.71 (m, 4H), 7.41-7.16 (m, 11H), 4.96 (d,  $J$  = 6.8 Hz, 2H). <sup>13</sup>C NMR (100 MHz CDCl<sub>3</sub>):  $\delta$  136.4 (d,  $J_{C-P}$  = 7.4 Hz), 132.3 (d,  $J_{C-P}$  = 2.7 Hz), 131.7 (d,  $J_{C-P}$  = 10.2 Hz), 131.4 (d,  $J_{C-P}$  = 136.1 Hz), 128.6 (d,  $J_{C-P}$  = 13.1 Hz), 128.6, 128.3, 127.9, 66.3 (d,  $J_{C-P}$  = 5.4 Hz). <sup>31</sup>P NMR (162 MHz CDCl<sub>3</sub>):  $\delta$  30.32.

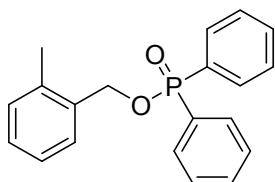

**2-Methylbenzyl diphenylphosphinate (3q).**<sup>16</sup> White solid; <sup>1</sup>H NMR (400 MHz CDCl<sub>3</sub>):  $\delta$  7.85-7.80 (m, 4H), 7.51 (t,  $J$  = 7.2 Hz, 2H), 7.45-7.40 (m, 4H), 7.31 (d,  $J$  = 7.2 Hz, 1H), 7.26-7.15 (m, 3H), 5.08 (d,  $J$  = 6.0 Hz, 2H), 2.32 (s, 3H). <sup>13</sup>C NMR (100 MHz CDCl<sub>3</sub>):  $\delta$  136.7, 134.4 (d,  $J_{C-P}$  = 7.7 Hz), 132.2 (d,  $J_{C-P}$  = 2.8 Hz), 131.7 (d,  $J_{C-P}$  = 10.1 Hz), 131.4 (d,  $J_{C-P}$  = 135.9 Hz), 130.3, 128.7, 128.6 (d,  $J_{C-P}$  = 13.1 Hz), 128.5, 126.0, 64.6 (d,  $J_{C-P}$  = 5.4 Hz), 18.8. <sup>31</sup>P NMR (162 MHz CDCl<sub>3</sub>):  $\delta$  32.21.

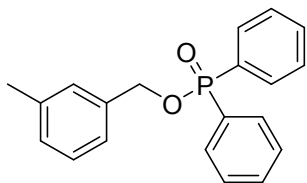

**3-Methylbenzyl diphenylphosphinate (3r).** White solid; m.p.: 100.0–100.5 °C; <sup>1</sup>H NMR (400 MHz CDCl<sub>3</sub>):  $\delta$  7.86-7.81 (m, 4H), 7.54-7.42 (m, 6H), 7.26-7.11 (m, 4H), 5.03 (d,  $J$  = 6.8 Hz, 2H), 2.33 (s, 3H). <sup>13</sup>C NMR (100 MHz CDCl<sub>3</sub>):  $\delta$  138.2, 136.2 (d,  $J_{C-P}$  = 7.5 Hz), 132.2 (d,  $J_{C-P}$  = 2.7 Hz), 131.7 (d,  $J_{C-P}$  = 10.1 Hz), 131.4 (d,  $J_{C-P}$  =

135.9 Hz), 129.1, 128.7, 128.5 (d,  $J_{C-P} = 13.2$  Hz), 125.0, 66.4 (d,  $J_{C-P} = 5.6$  Hz), 21.4.

$^{31}\text{P}$  NMR (162 MHz  $\text{CDCl}_3$ ):  $\delta$  32.23.  $\text{C}_{20}\text{H}_{19}\text{O}_2\text{P}$ . HRMS: Cal. 322.1123. Found 322.1115.

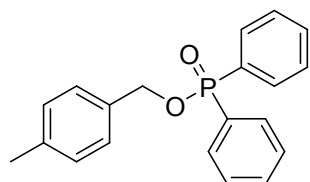

**4-Methylbenzyl diphenylphosphinate (3s).**<sup>16</sup> White solid;  $^1\text{H}$  NMR (400 MHz  $\text{CDCl}_3$ ):  $\delta$  7.85-7.80 (m, 4H), 7.50-7.42 (m, 6H), 7.25 (d,  $J = 7.2$  Hz, 2H), 7.14 (d, 8.0 Hz, 2H), 5.02 (d,  $J = 6.4$  Hz, 2H), 2.33 (s, 3H).  $^{13}\text{C}$  NMR (100 MHz  $\text{CDCl}_3$ ):  $\delta$  138.1, 133.4 (d,  $J_{C-P} = 7.5$  Hz), 132.2, 131.7 (d,  $J_{C-P} = 10.1$  Hz), 131.5 (d,  $J_{C-P} = 135.0$  Hz), 129.2, 128.5 (d,  $J_{C-P} = 13.1$  Hz), 128.1, 66.3 (d,  $J_{C-P} = 5.6$  Hz), 21.2.  $^{31}\text{P}$  NMR (162 MHz  $\text{CDCl}_3$ ):  $\delta$  32.09.

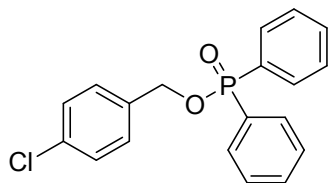

**4-Chlorobenzyl diphenylphosphinate (3t).**<sup>16</sup> White solid;  $^1\text{H}$  NMR (400 MHz  $\text{CDCl}_3$ ):  $\delta$  7.84-7.79 (m, 4H), 7.53 (t,  $J = 7.2$  Hz, 2H), 7.47-7.43 (m, 4H), 7.33-7.28 (m, 4H), 5.03 (d,  $J = 7.2$  Hz, 2H).  $^{13}\text{C}$  NMR (100 MHz  $\text{CDCl}_3$ ):  $\delta$  134.9 (d,  $J_{C-P} = 7.2$  Hz), 134.2, 132.3 (d,  $J_{C-P} = 2.8$  Hz), 131.7 (d,  $J_{C-P} = 10.2$  Hz), 131.2 (d,  $J_{C-P} = 135.8$  Hz), 129.3, 128.8, 128.6 (d,  $J_{C-P} = 13.2$  Hz), 65.5 (d,  $J_{C-P} = 5.4$  Hz).  $^{31}\text{P}$  NMR (162 MHz  $\text{CDCl}_3$ ):  $\delta$  32.68.

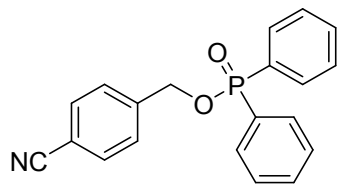

**4-Cyanobenzyl diphenylphosphinate (3u).**<sup>16</sup> White solid; <sup>1</sup>H NMR (400 MHz CDCl<sub>3</sub>):  $\delta$  7.85-7.80 (m, 4H), 7.64 (d,  $J$  = 8.0 Hz, 2H), 7.56 (t,  $J$  = 7.2 Hz, 2H), 7.49-7.45 (m, 6H), 5.11 (d,  $J$  = 7.6 Hz, 2H). <sup>13</sup>C NMR (100 MHz CDCl<sub>3</sub>):  $\delta$  141.7 (d,  $J_{C-P}$  = 7.1 Hz), 132.6 (d,  $J_{C-P}$  = 2.8 Hz), 132.4, 131.6 (d,  $J_{C-P}$  = 10.3 Hz), 130.8 (d,  $J_{C-P}$  = 136.0 Hz), 128.7 (d,  $J_{C-P}$  = 13.1 Hz), 128.0, 118.6, 112.1, 65.1 (d,  $J_{C-P}$  = 5.2 Hz). <sup>31</sup>P NMR (162 MHz CDCl<sub>3</sub>):  $\delta$  33.43.

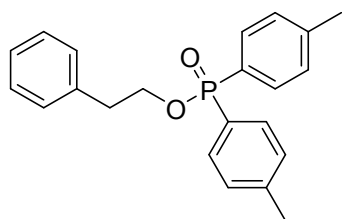

**Phenethyl di-*p*-tolylphosphinate (3v).** Colorless oil; <sup>1</sup>H NMR (400 MHz CDCl<sub>3</sub>):  $\delta$  7.61-7.56 (m, 4H), 7.29-7.17 (m, 9H), 4.19 (dt,  $J$  = 6.8 Hz, 6.8 Hz, 2H), 3.01 (t,  $J$  = 6.8 Hz, 2H), 2.33 (s, 6H). <sup>13</sup>C NMR (100 MHz CDCl<sub>3</sub>):  $\delta$  142.5 (d,  $J_{C-P}$  = 2.8 Hz), 137.6, 131.6 (d,  $J_{C-P}$  = 10.4 Hz), 129.2 (d,  $J_{C-P}$  = 13.8 Hz), 129.2, 128.5, 128.4 (d,  $J_{C-P}$  = 138.8 Hz), 126.6, 65.2 (d,  $J_{C-P}$  = 6.0 Hz), 37.1 (d,  $J_{C-P}$  = 6.9 Hz), 21.6 (d,  $J_{C-P}$  = 1.0 Hz). <sup>31</sup>P NMR (162 MHz CDCl<sub>3</sub>):  $\delta$  32.44. C<sub>22</sub>H<sub>23</sub>O<sub>2</sub>P. HRMS: Cal. 350.1436. Found 350.1422.

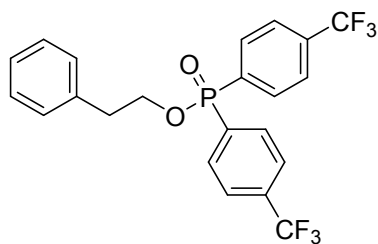

**Phenethyl bis(4-(trifluoromethyl)phenyl)phosphinate (3w).** White solid; m.p.: 90.5–91.3 °C;  $^1\text{H}$  NMR (400 MHz  $\text{CDCl}_3$ ):  $\delta$  7.81-7.76 (m, 4H), 7.68-7.65 (m, 4H), 7.34-7.24 (m, 3H), 7.20 (d,  $J = 6.8$  Hz, 2H), 4.29 (dt,  $J = 6.8$  Hz, 6.8 Hz, 2H), 3.07 (t,  $J = 6.8$  Hz, 2H).  $^{13}\text{C}$  NMR (100 MHz  $\text{CDCl}_3$ ):  $\delta$  137.2, 134.9 (d,  $J_{\text{C-P}} = 135.7$  Hz), 134.2 (dq,  $J_{\text{C-P}} = 3.0$  Hz,  $J_{\text{C-F}} = 32.6$  Hz), 132.1 (d,  $J_{\text{C-P}} = 10.5$  Hz), 129.1, 128.6, 126.9, 125.5 (dq,  $J_{\text{C-P}} = 9.5$  Hz,  $J_{\text{C-F}} = 3.7$  Hz), 123.4 (q,  $J_{\text{C-F}} = 271.3$  Hz), 66.1 (d,  $J_{\text{C-P}} = 6.0$  Hz), 36.9 (d,  $J_{\text{C-P}} = 7.0$  Hz).  $^{31}\text{P}$  NMR (162 MHz  $\text{CDCl}_3$ ):  $\delta$  27.66.  $\text{C}_{22}\text{H}_{17}\text{F}_6\text{O}_2\text{P}$ . HRMS: Cal. 458.0870. Found 457.0789(M-H).

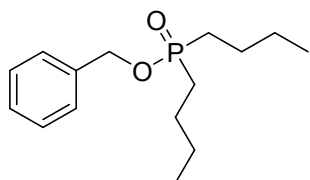

**Benzyl dibutylphosphinate (3x).** Yellow oil;  $^1\text{H}$  NMR (400 MHz  $\text{CDCl}_3$ ):  $\delta$  7.38-7.27 (m, 5H), 5.03 (d,  $J = 8.0$  Hz, 2H), 1.78-1.67 (m, 4H), 1.59-1.49 (m, 4H), 1.42-1.33 (m, 4H), 0.81 (t,  $J = 7.2$  Hz, 6H).  $^{13}\text{C}$  NMR (100 MHz  $\text{CDCl}_3$ ):  $\delta$  137.0 (d,  $J_{\text{C-P}} = 5.7$  Hz), 128.6, 128.2, 127.8, 65.5 (d,  $J_{\text{C-P}} = 6.1$  Hz), 27.9 (d,  $J_{\text{C-P}} = 88.6$  Hz), 24.0 (d,  $J_{\text{C-P}} = 8.4$  Hz), 23.9 (d,  $J_{\text{C-P}} = 3.1$  Hz), 13.55.  $^{31}\text{P}$  NMR (162 MHz  $\text{CDCl}_3$ ):  $\delta$  59.33.

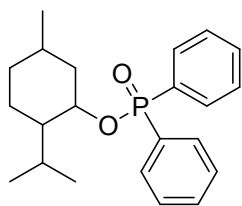

**Benzyl dibutylphosphinate (3y).**<sup>17</sup> White solid; <sup>1</sup>H NMR (400 MHz CDCl<sub>3</sub>):  $\delta$  7.83-7.73 (m, 4H), 7.50-7.39 (m, 6H), 4.27-4.18 (m, 1H), 2.16-2.07 (m, 2H), 1.62-1.60 (m, 2H), 1.46-1.34 (m, 2H), 1.23-1.18 (m, 1H), 0.98-0.92 (m, 1H), 0.87-0.78 (m, 7H), 0.51 (d,  $J = 1.7$  Hz, 3H). <sup>13</sup>C NMR (100 MHz CDCl<sub>3</sub>):  $\delta$  133.0 (d,  $J_{C-P} = 137.1$  Hz), 132.3 (d,  $J_{C-P} = 137.9$  Hz), 131.8 (d,  $J_{C-P} = 2.8$  Hz), 131.7 (d,  $J_{C-P} = 2.8$  Hz), 131.6 (d,  $J_{C-P} = 3.8$  Hz), 131.5 (d,  $J_{C-P} = 3.6$  Hz), 128.2 (d,  $J_{C-P} = 13.0$  Hz), 128.2 (d,  $J_{C-P} = 13.0$  Hz), 77.1 (d,  $J_{C-P} = 7.0$  Hz), 48.8 (d,  $J_{C-P} = 6.3$  Hz), 43.5, 34.0, 31.5, 25.5, 22.6, 21.9, 21.1, 15.2. <sup>31</sup>P NMR (162 MHz CDCl<sub>3</sub>):  $\delta$  29.41.

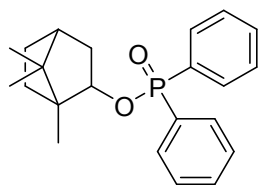

**Benzyl dibutylphosphinate (3z).** Colorless oil; <sup>1</sup>H NMR (400 MHz CDCl<sub>3</sub>):  $\delta$  7.84-7.78 (m, 4H), 7.52-7.42 (m, 6H), 4.59 (tb,  $J = 8.8$  Hz, 1H), 2.23-2.09 (m, 2H), 1.78-1.72 (m, 1H), 1.64 (t,  $J = 4.4$  Hz, 1H), 1.37-1.26 (m, 4H), 0.86 (s, 3H), 0.85 (s, 3H), 0.78 (s, 3H). <sup>13</sup>C NMR (100 MHz CDCl<sub>3</sub>):  $\delta$  132.7 (d,  $J_{C-P} = 136.2$  Hz), 132.2 (d,  $J_{C-P} = 137.0$  Hz), 131.9 (d,  $J_{C-P} = 2.2$  Hz), 131.9 (d,  $J_{C-P} = 2.4$  Hz), 131.7 (d,  $J_{C-P} = 10.0$  Hz), 131.7 (d,  $J_{C-P} = 10.0$  Hz), 128.4 (d,  $J_{C-P} = 13.0$  Hz), 128.4 (d,  $J_{C-P} = 13.0$  Hz), 81.7 (d,  $J_{C-P} = 5.6$  Hz), 49.9 (d,  $J_{C-P} = 5.2$  Hz), 47.6, 45.0, 37.5, 28.1, 26.8, 19.9, 18.8, 13.4. <sup>31</sup>P NMR (162 MHz CDCl<sub>3</sub>):  $\delta$  30.46. C<sub>22</sub>H<sub>27</sub>O<sub>2</sub>P. HRMS: Cal. 354.1749. Found

354.1731.

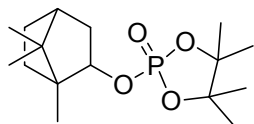

**4,4,5,5-tetramethyl-2-((1,7,7-trimethylbicyclo[2.2.1]heptan-2-yl)oxy)-1,3,2-**

**dioxaphospholane 2-oxide (3aa).** Colorless oil;  $^1\text{H}$  NMR (400 MHz  $\text{CDCl}_3$ ):  $\delta$  4.71-4.67 (m, 1H), 2.35-2.29 (m, 1H), 1.91-1.84 (m, 1H), 1.75-1.70 (m, 1H), 1.67-1.63 (m, 2H), 1.45 (s, 6H), 1.41 (s, 6H), 1.29-1.20 (m, 2H), 0.90 (s, 3H), 0.86 (s, 6H).  $^{13}\text{C}$  NMR (100 MHz  $\text{CDCl}_3$ ):  $\delta$  88.1 (d,  $J_{\text{C-P}} = 6.1$  Hz), 85.1 (d,  $J_{\text{C-P}} = 6.2$  Hz), 49.6 (d,  $J_{\text{C-P}} = 5.9$  Hz), 47.7, 44.8, 37.0 (d,  $J_{\text{C-P}} = 2.9$  Hz), 28.0, 26.7, 24.2 (d,  $J_{\text{C-P}} = 1.1$  Hz), 24.1 (d,  $J_{\text{C-P}} = 1.3$  Hz), 23.7 (d,  $J_{\text{C-P}} = 5.0$  Hz), 23.6 (d,  $J_{\text{C-P}} = 5.1$  Hz), 19.9, 18.8, 13.2.  $^{31}\text{P}$  NMR (162 MHz  $\text{CDCl}_3$ ):  $\delta$  12.65.  $\text{C}_{16}\text{H}_{29}\text{O}_4\text{P}$ . HRMS: Cal. 316.1803. Found 316.1791.

## 5. References

- (1) Zarate, C.; Martin, R. *J. Am. Chem. Soc.* **2014**, *136*, 2236.
- (2) Tan, S. T.; Fan, W. Y. *Eur. J. Inorg. Chem.* **2010**, 4631.
- (3) Yoshida, M.; Terumine, T.; Masaki, E.; Hara, S. *J. Org. Chem.* **2013**, *78*, 10853.
- (4) Zhao, Y.-L.; Wu, G.-J.; Han, F.-S. *Chem. Commun.* **2012**, *48*, 5868.
- (5) Zhao, Y.-L.; Wu, G.-J.; Li, Y.; Gao, L.-X.; Han, F.-S. *Chem. Eur. J.* **2012**, *18*, 9622.
- (6) Li, Y.; Lu, L.-Q.; Das, S.; Pisiewicz, S.; Junge, K.; Beller, M. *J. Am. Chem. Soc.* **2012**, *134*, 18325.
- (7) Luo, Y.; Wu, J. *Organometallics* **2009**, *28*, 6823.
- (8) Wu, Y.; Liu, L.; Yan, K.; Xu, P.; Gao, Y.; Zhao, Y. *J. Org. Chem.* **2014**, *79*, 8118.
- (9) Gonzalez-Nogal, A. M.; Cuadrado, P. *Tetrahedron* **2013**, *69*, 8080.
- (10) Alonso, D. A.; Ájpera, C. N. *Org. Reactions* **2009**, *72*, 367.
- (11) Bew, S. P.; Brimage, R. A.; Hughes, D. L.; Legentil, L.; Sharma, S. V.; Wilson, M. A. *J. Org. Chem.* **2007**, *72*, 2655.
- (12) Wagner, S.; Rakotomalala, M.; Bykov, Y.; Walter, O.; Döring, M. *Heteroatom Chem.* **2012**, *23*, 216.
- (13) Mccallum, J. S.; Liebeskind, L. S. *Synthesis* **1993**, 819-823.
- (14) Jablonkai, E.; Balázs, L. B.; Keglevich, G. *Phosphorus Sulfur Silicon Relat. Elem.* **2015**, *190*, 660.
- (15) Dahlhoff, W. V.; Taba, K. M. *Z. Naturforsch.* **1989**, *44b*, 1260.
- (16) Xu, J.; Zhang, P.; Li, X.; Gao, Y.; Wu, J.; Tang, G.; Zhao, Y. *Adv. Synth. Catal.* **2014**, *356*, 3331.
- (17) Han, Z. S.; Zhang, L.; Xu, Y.; Sieber, J. D.; Marsini, M. A.; Li, Z.; Reeves, J. T.; Fandrick, K. R.; Patel, N. D.; Desrosiers, J.-N.; Qu, B.; Chen, A.; Rudzinski, D. M.; Samankumara, L. P.; Ma, S.; Grinberg, N.; Roschangar, F.; Yee, N. Y.; Wang, G.; Song, J. J.; Senanayake, C. H. *Angew. Chem. Int. Ed.* **2015**, *54*, 5474.



6. Copies of  $^1\text{H}$  NMR,  $^{13}\text{C}$  NMR and  $^{31}\text{P}$  NMR spectra

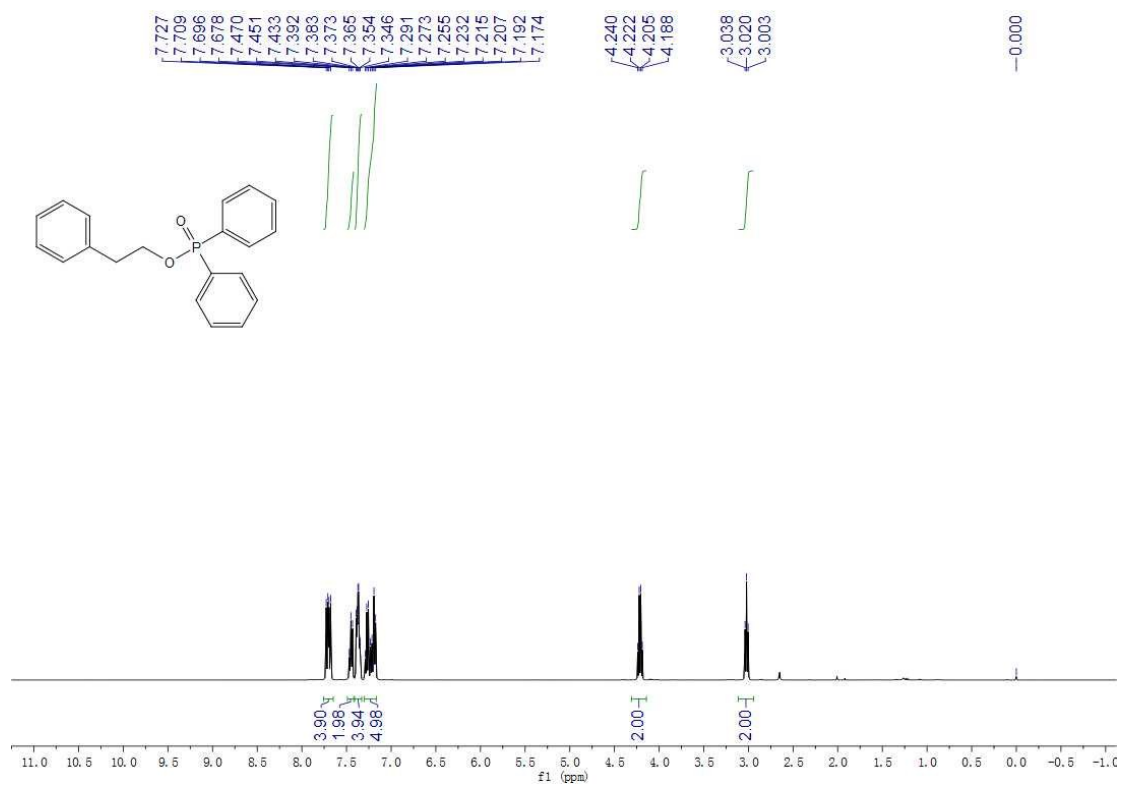

Figure 1. 3a- $^1\text{H}$  NMR

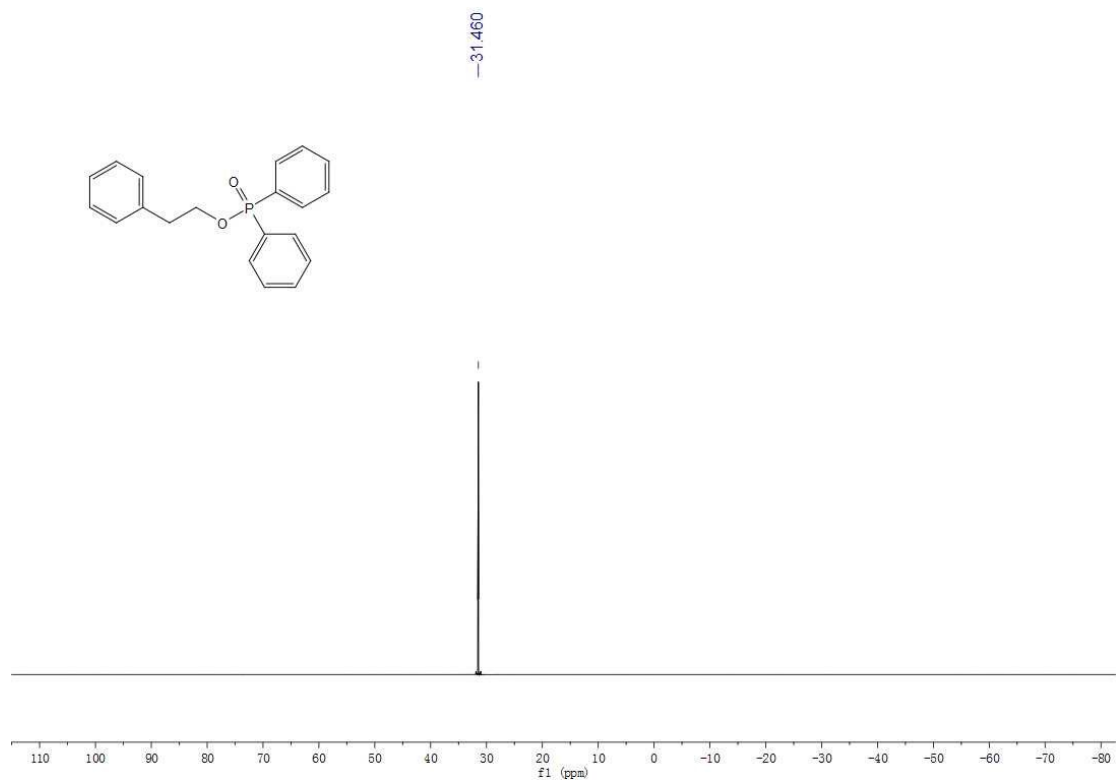

Figure 2. 3a- $^{31}\text{P}$  NMR

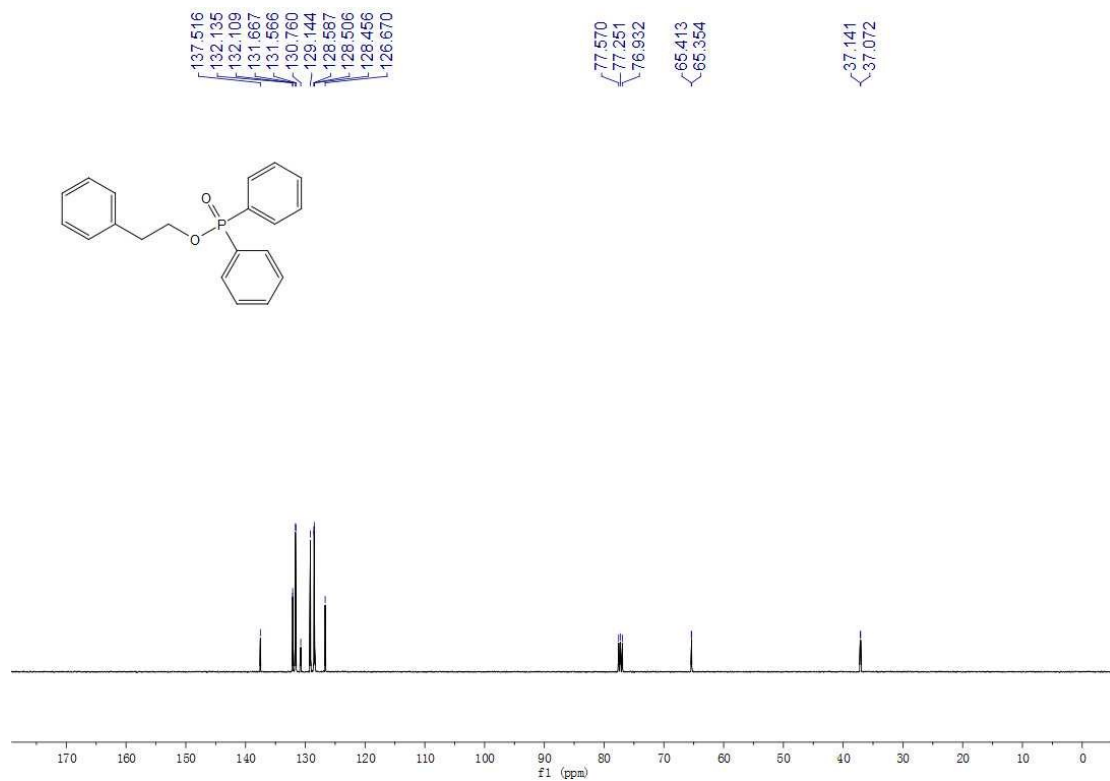

Figure 3. 3a- $^{13}\text{C}$  NMR

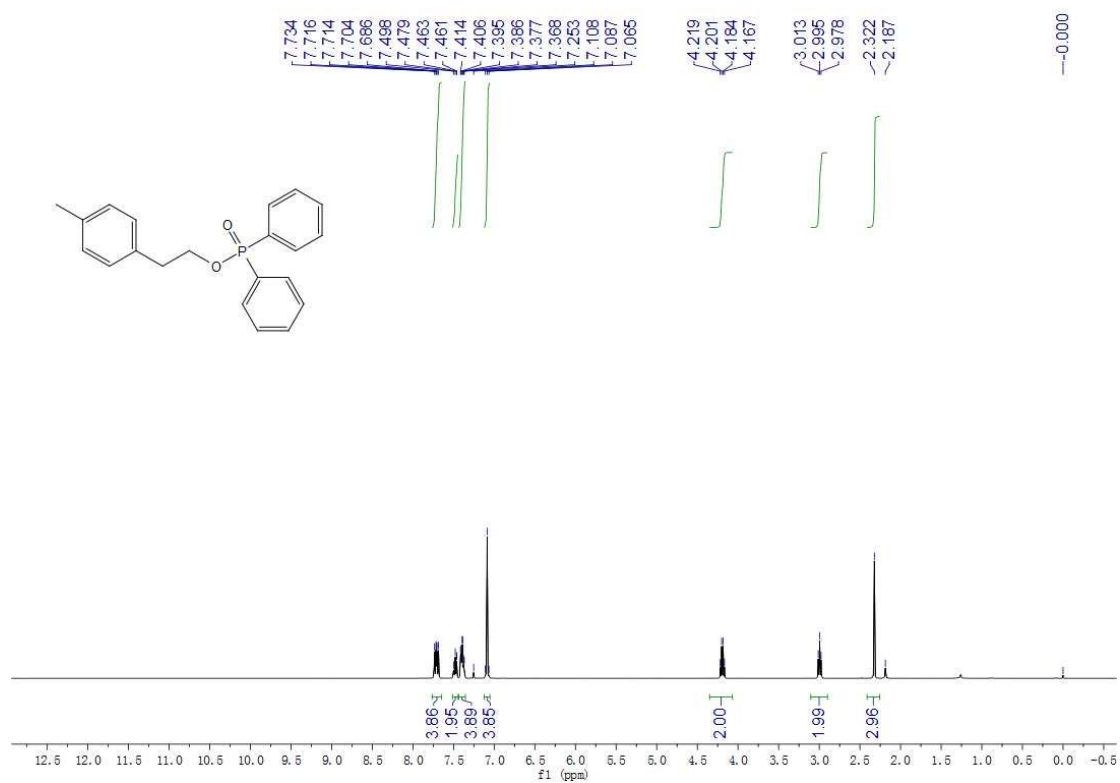

Figure 4. 3b- $^1\text{H}$  NMR

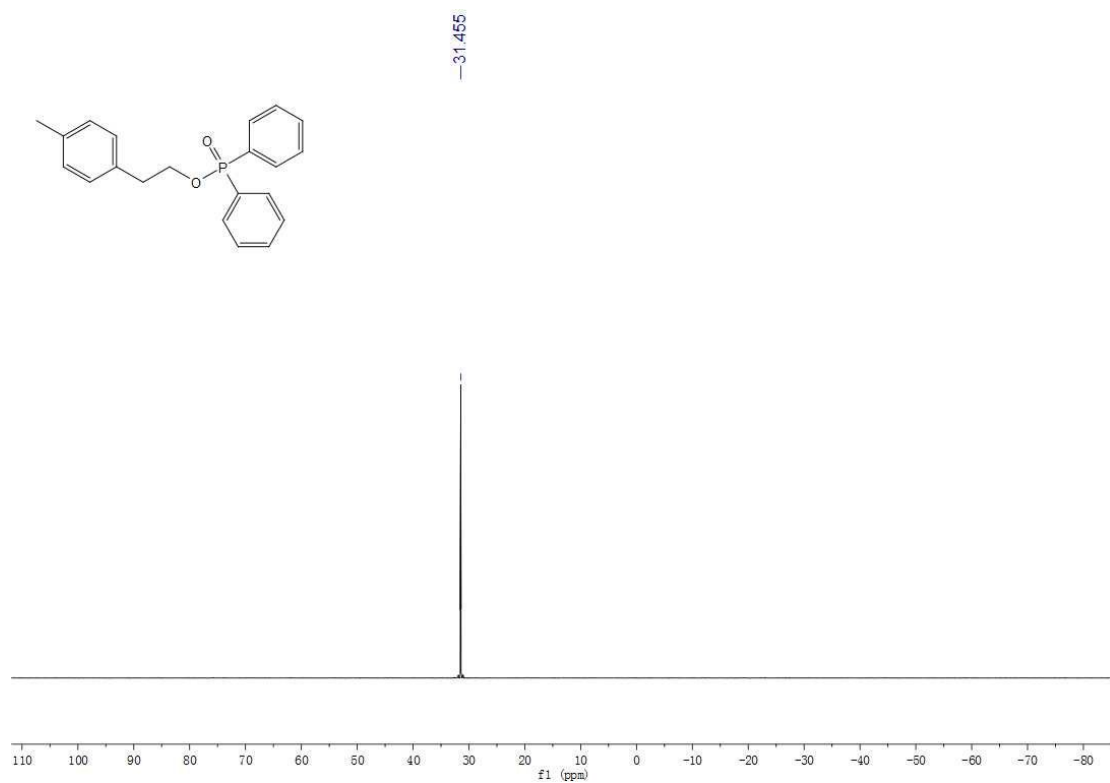

Figure 5. 3b-<sup>31</sup>P NMR

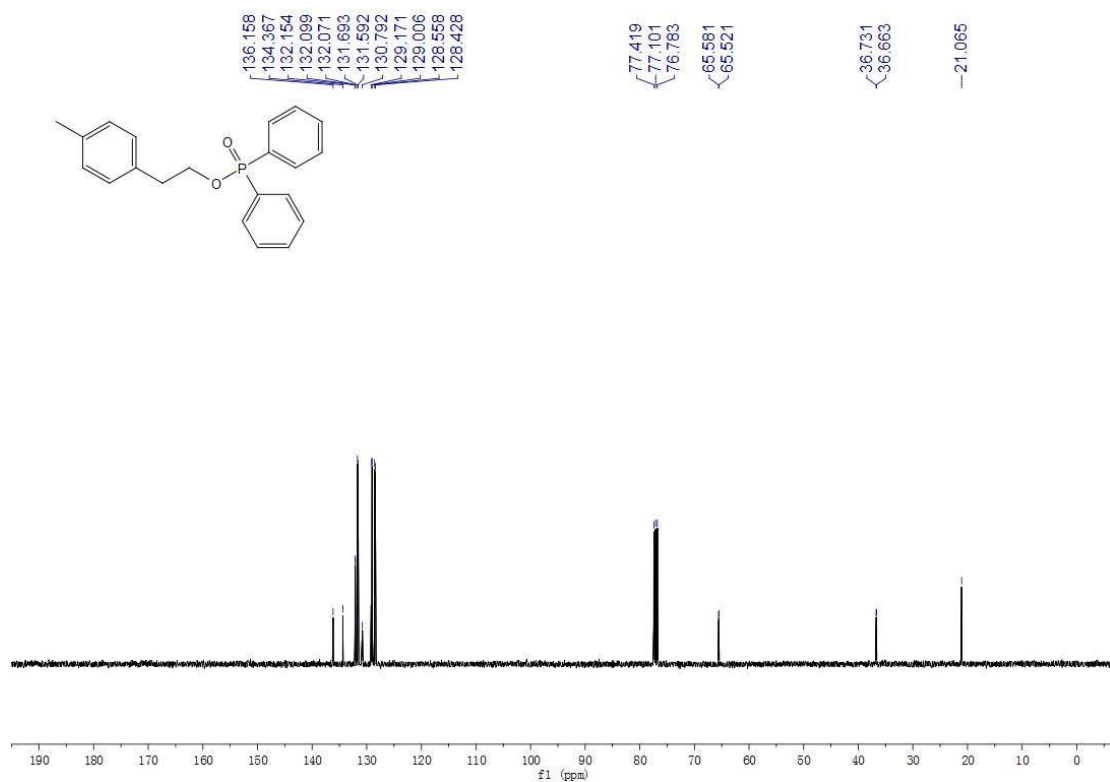

Figure 6. 3b-<sup>13</sup>C NMR

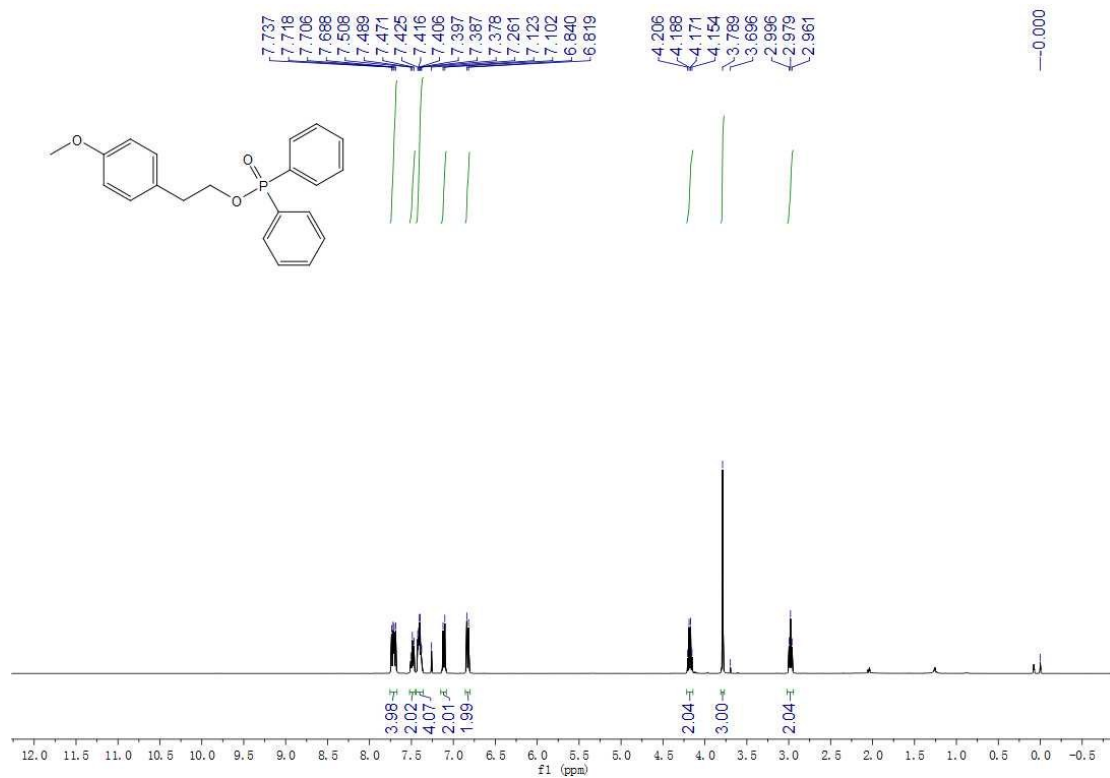

Figure 7. 3c-<sup>1</sup>H NMR

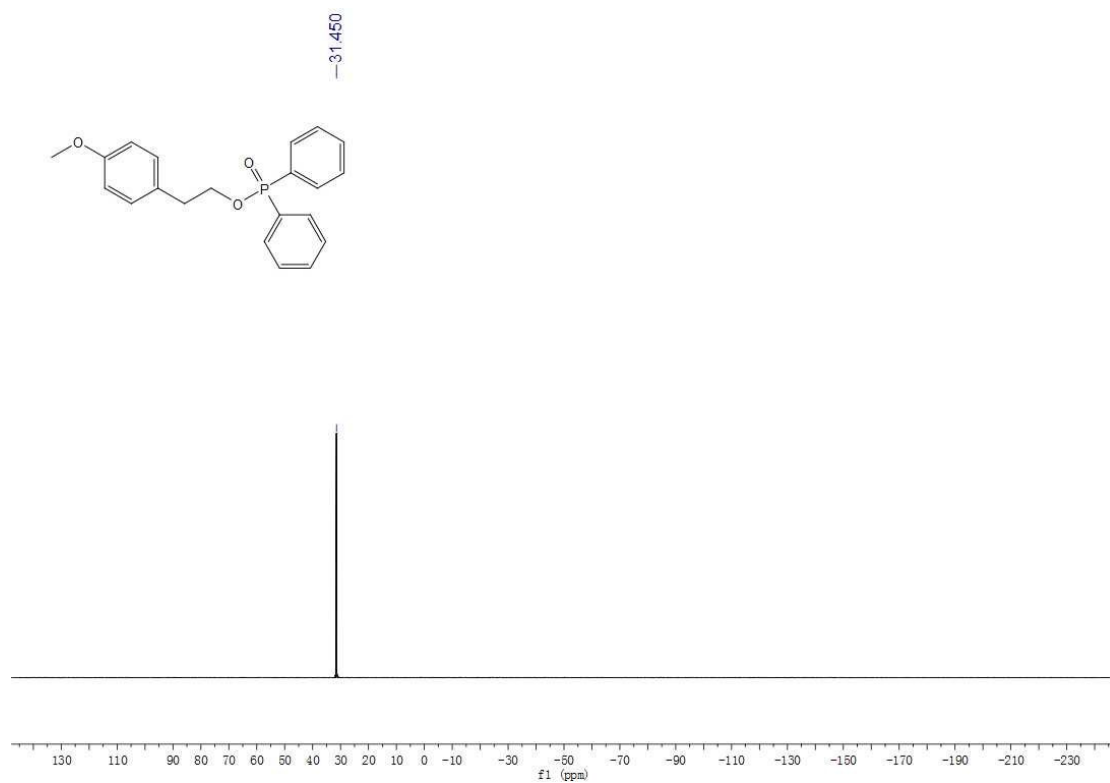

Figure 8. 3c-<sup>31</sup>P NMR

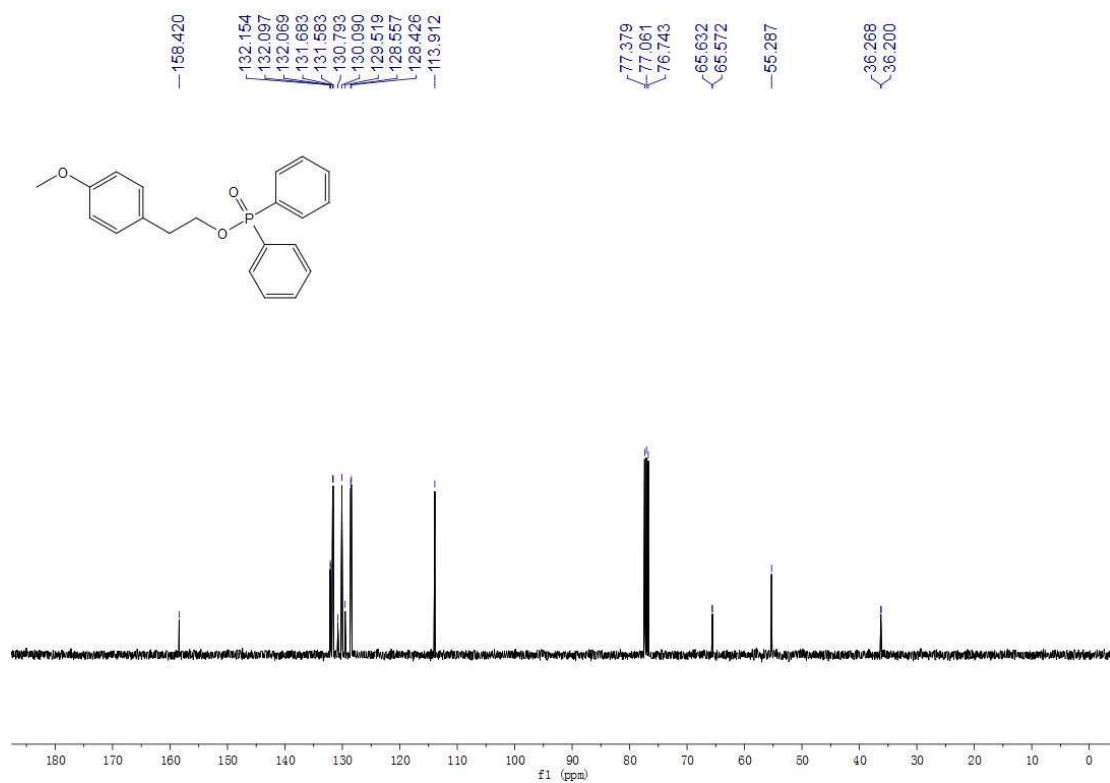

Figure 9. 3c- $^{13}\text{C}$  NMR

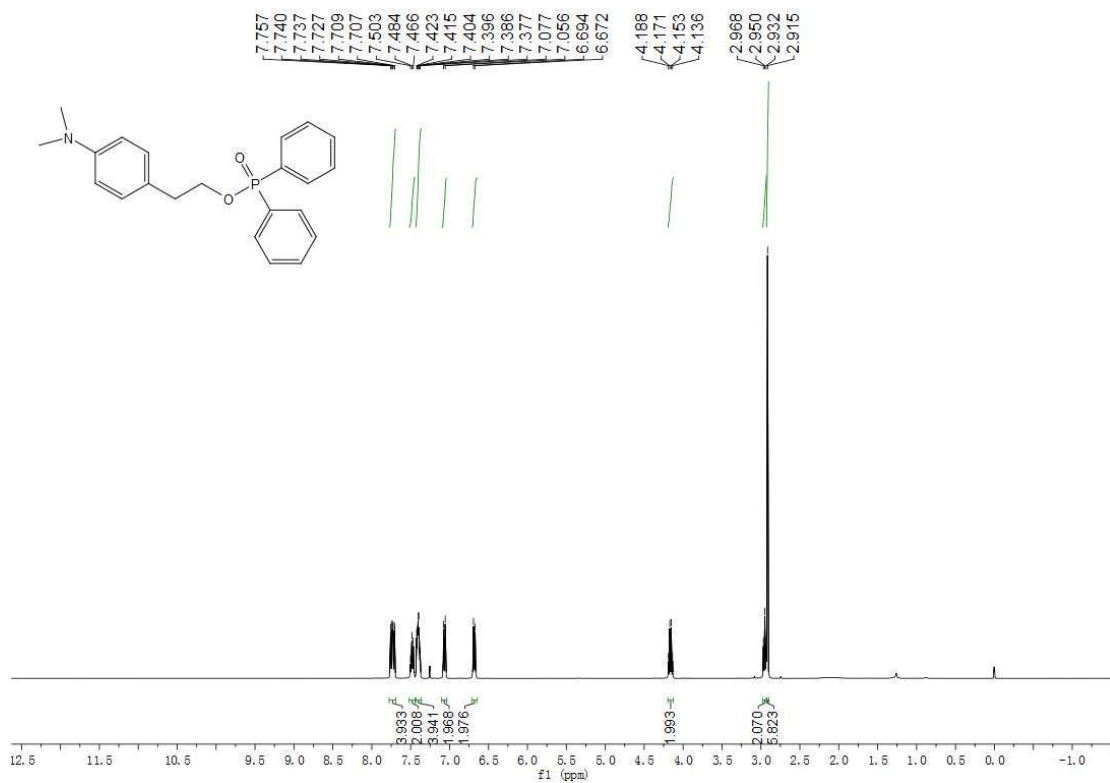

Figure 10. 3d- $^1\text{H}$  NMR

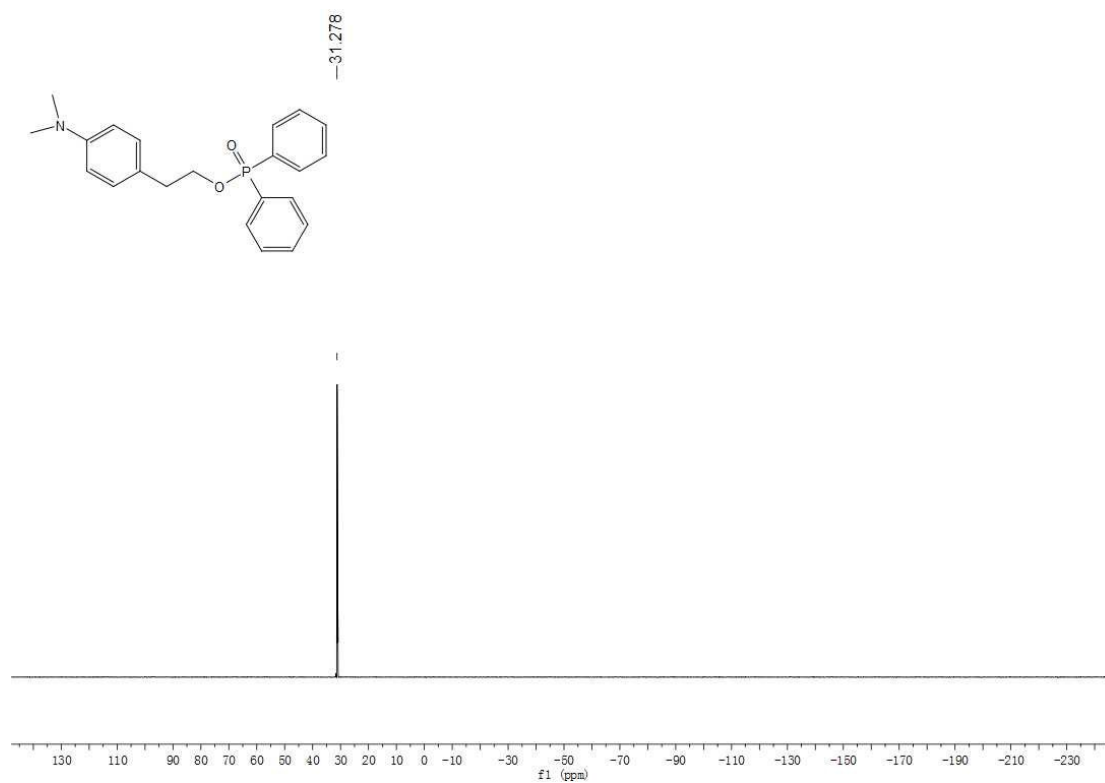

Figure 11. 3d- $^{31}\text{P}$  NMR

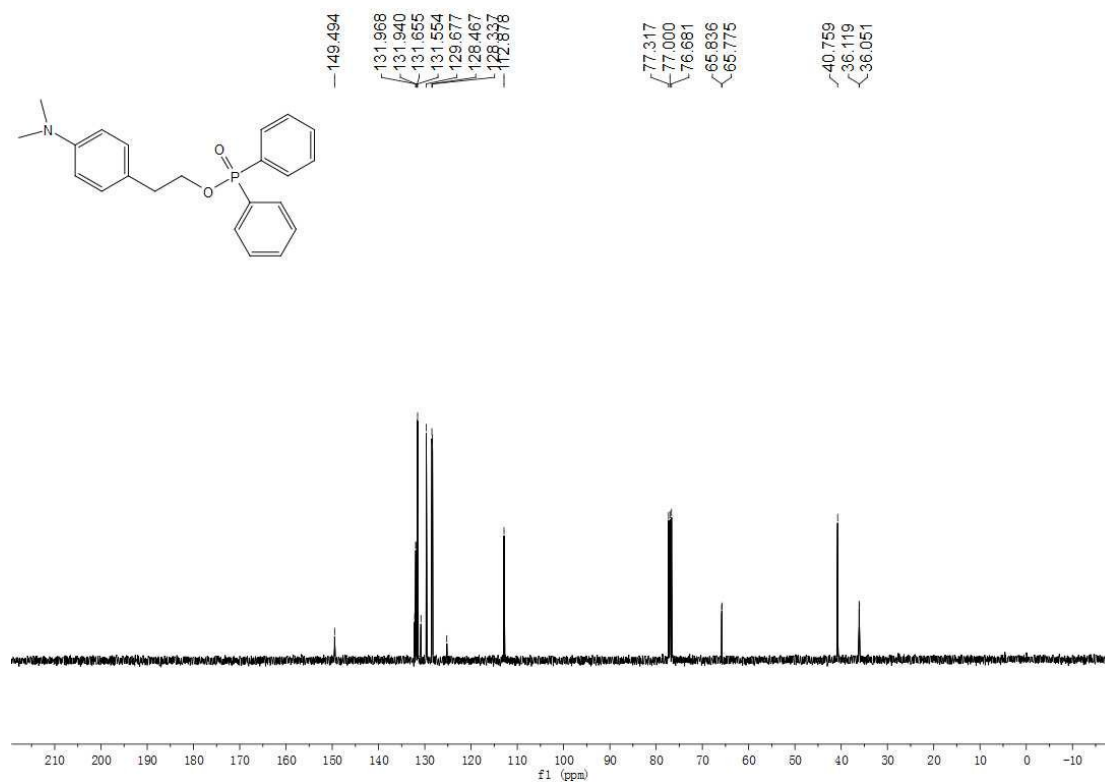

Figure 12. 3d- $^{13}\text{C}$  NMR

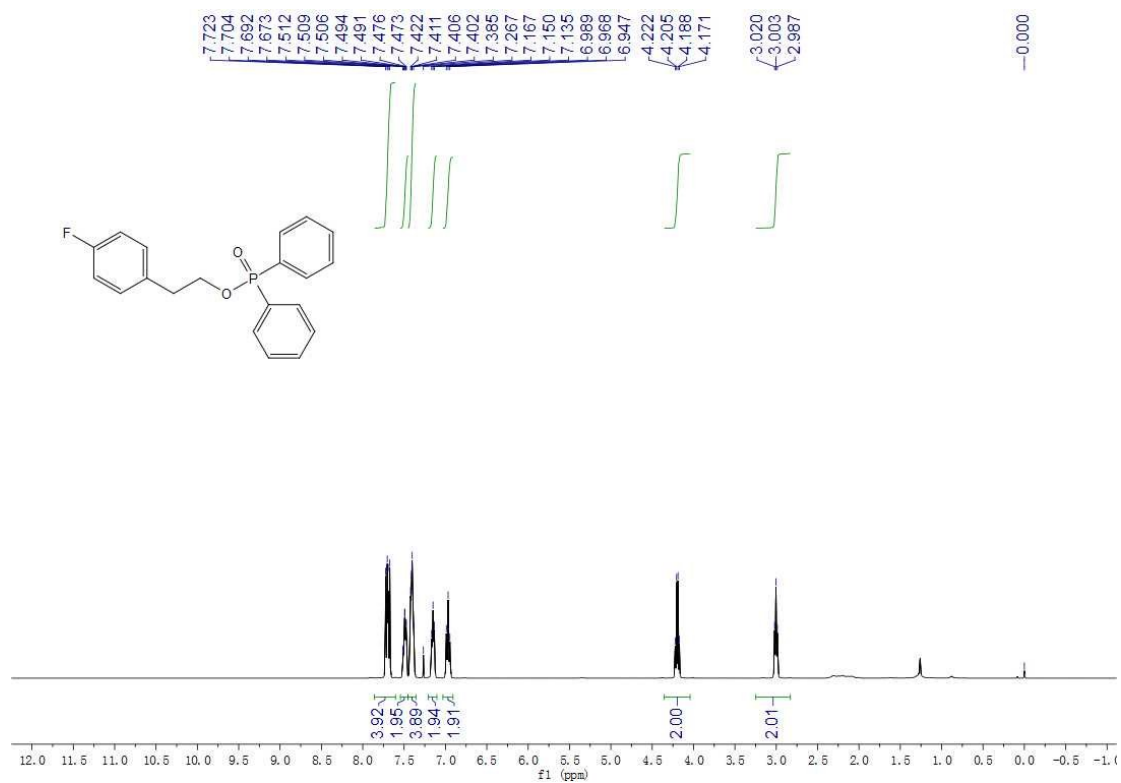

Figure 13.  $^3\text{e}$ - $^1\text{H}$  NMR

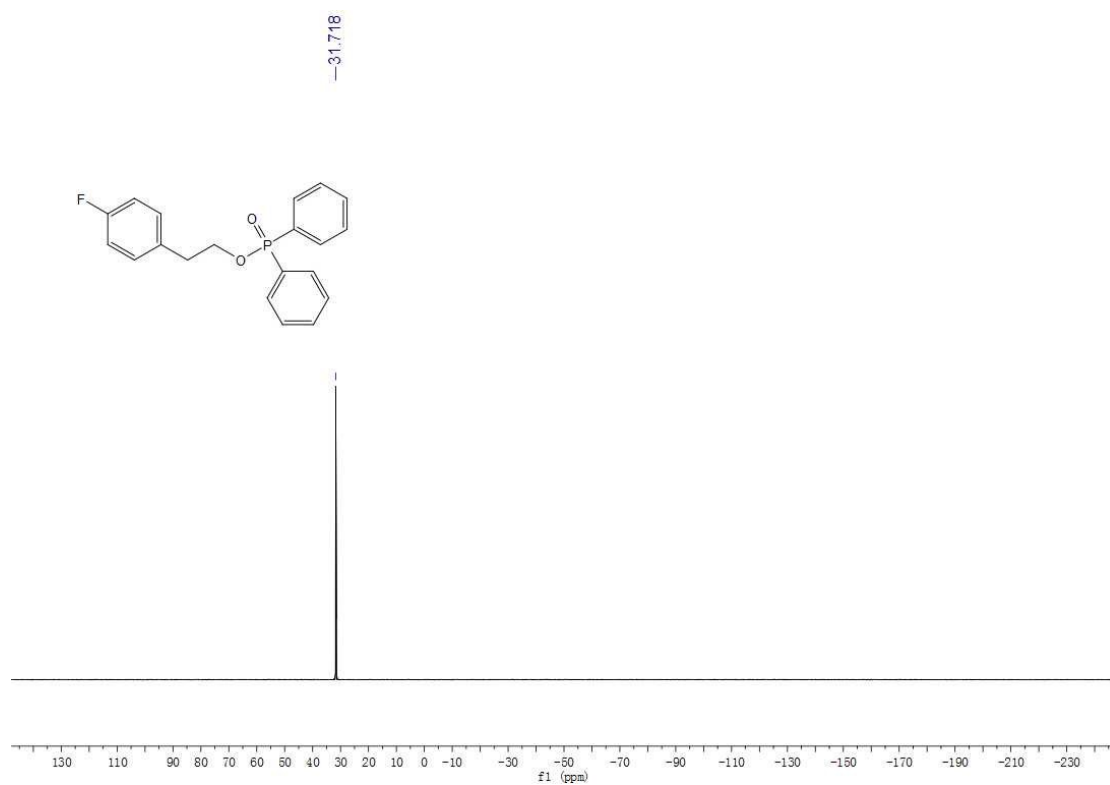

Figure 14.  $^3\text{e}$ - $^{31}\text{P}$  NMR

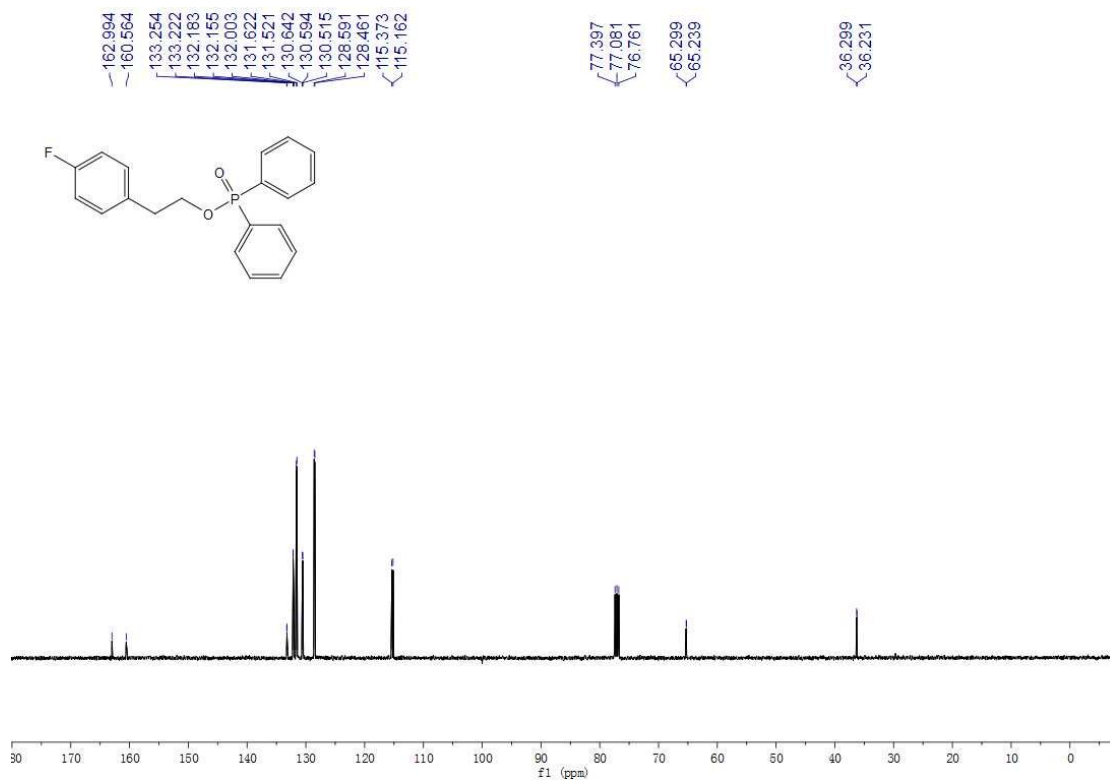

Figure 15. 3e-<sup>13</sup>C NMR

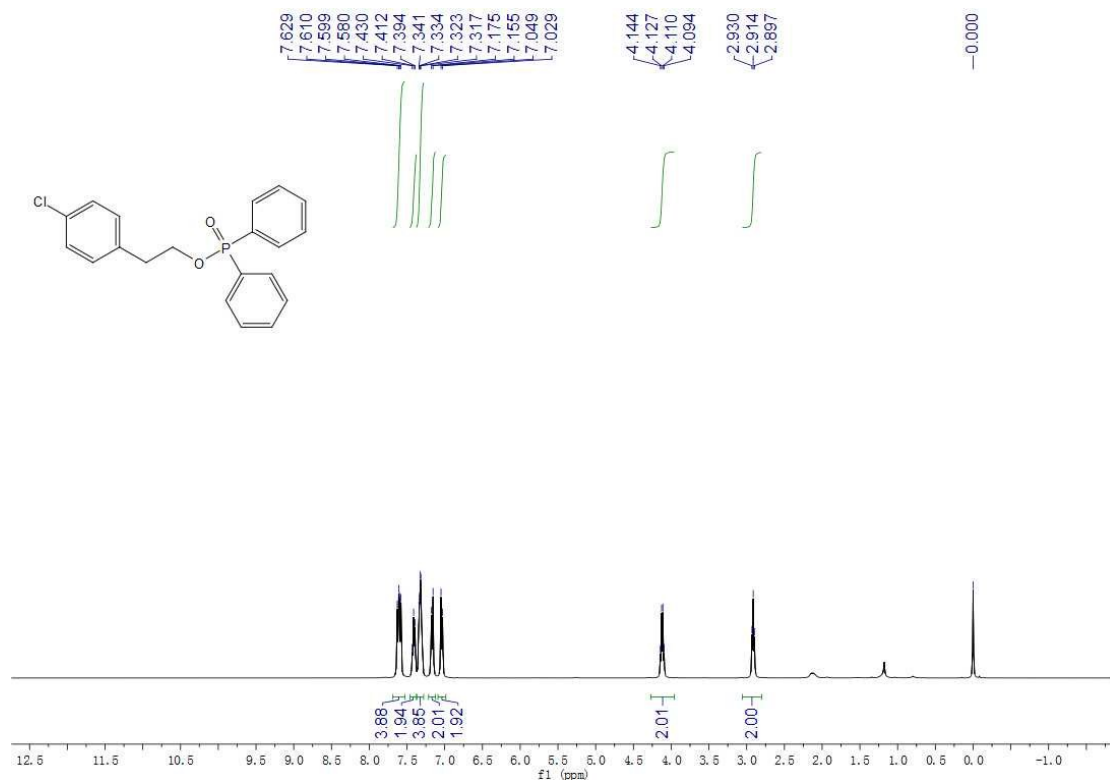

Figure 16. 3f-<sup>1</sup>H NMR



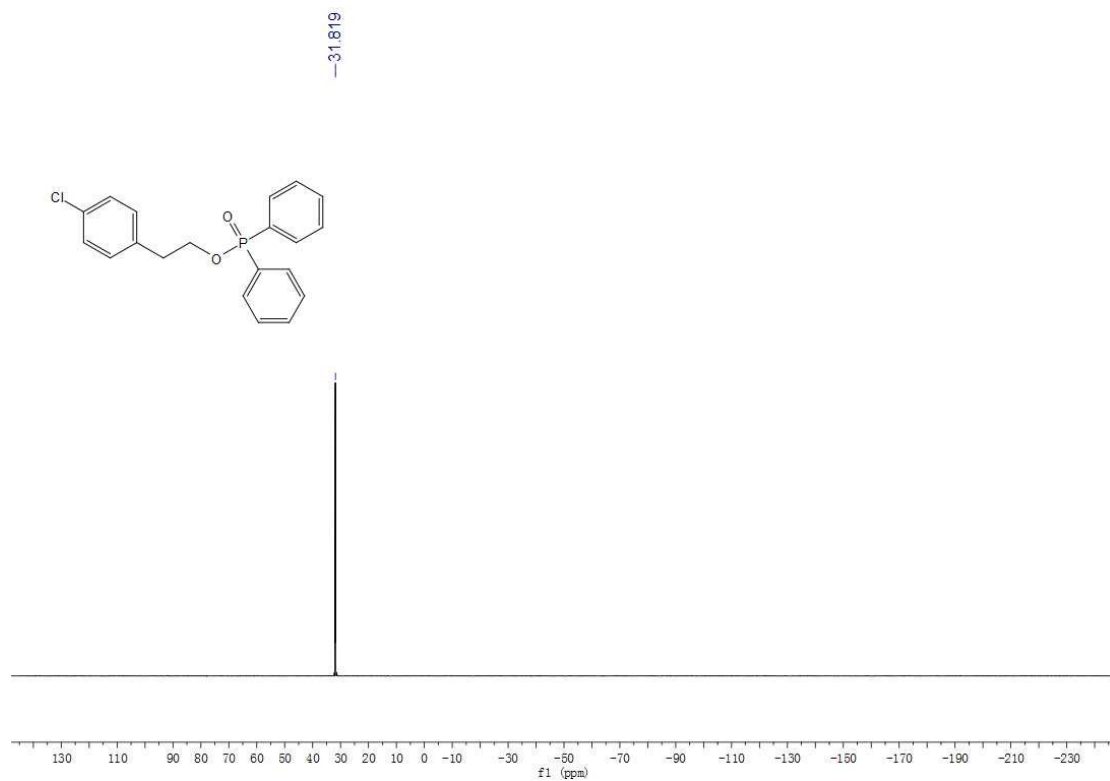

Figure 17. 3f-<sup>31</sup>P NMR

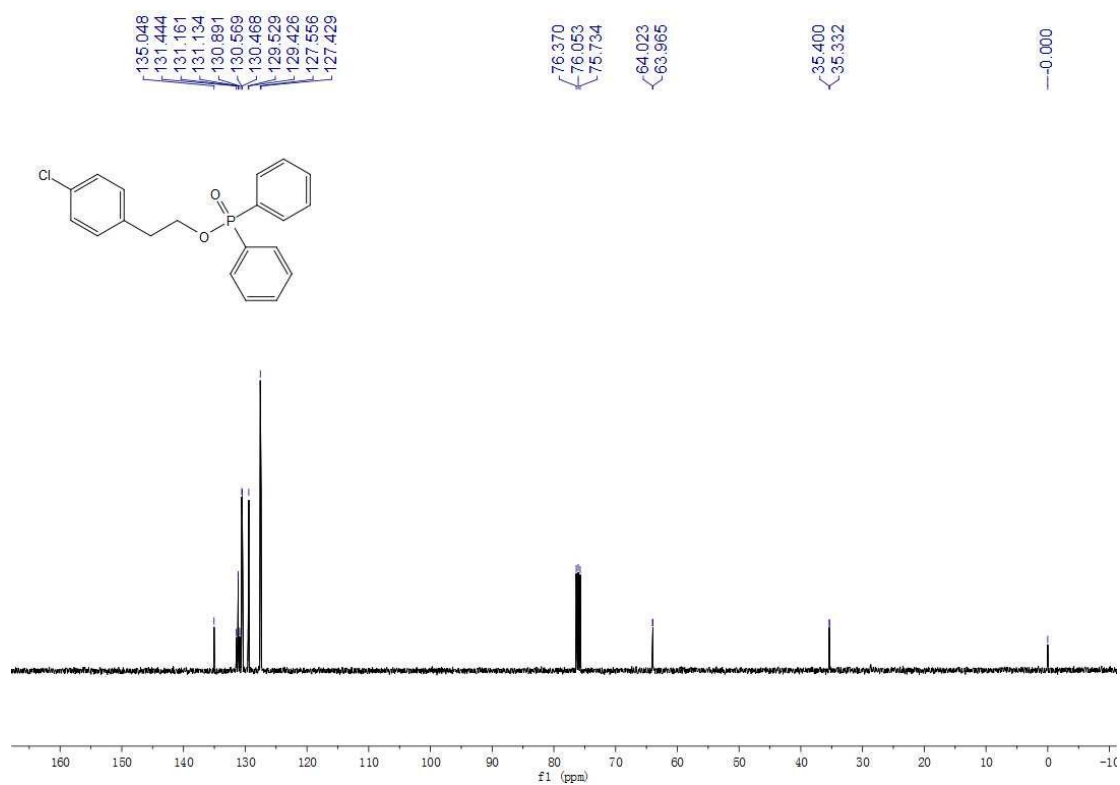

Figure 18. 3f-<sup>13</sup>C NMR

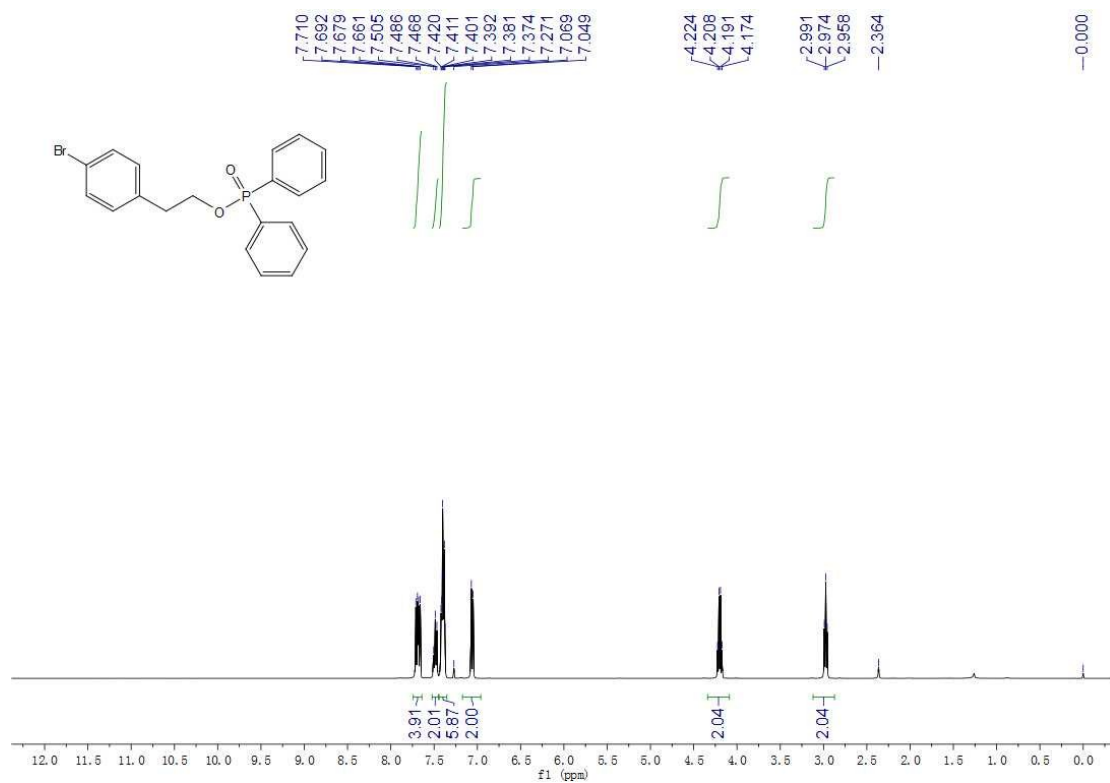

Figure 19.  $^3\text{g-}^1\text{H}$  NMR

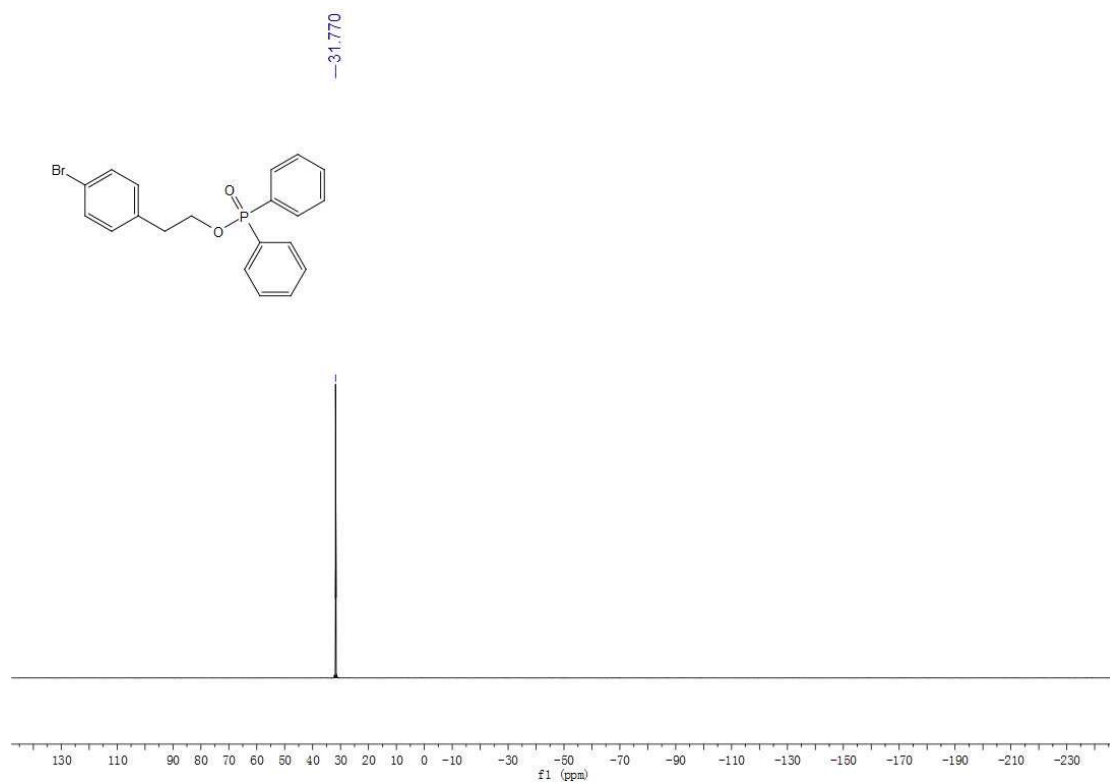

Figure 20.  $^3\text{g-}^{31}\text{P}$  NMR

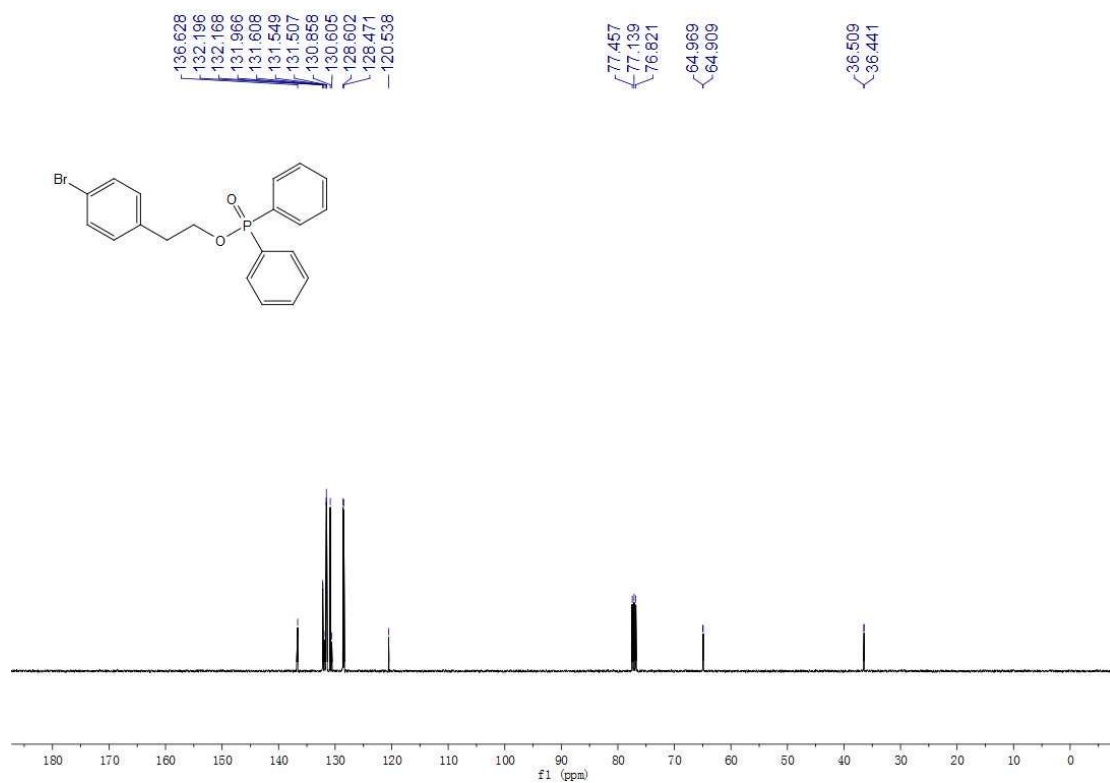

Figure 21. <sup>3g</sup>-<sup>13</sup>C NMR

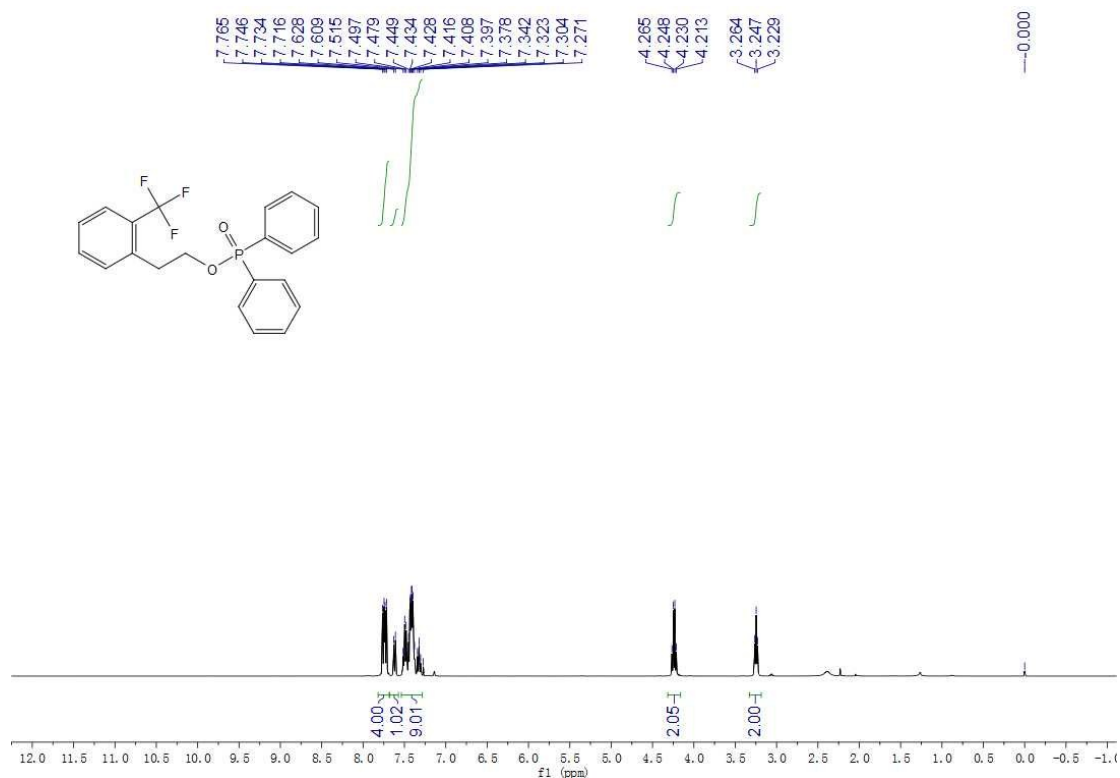

Figure 22. <sup>3h</sup>-<sup>1</sup>H NMR

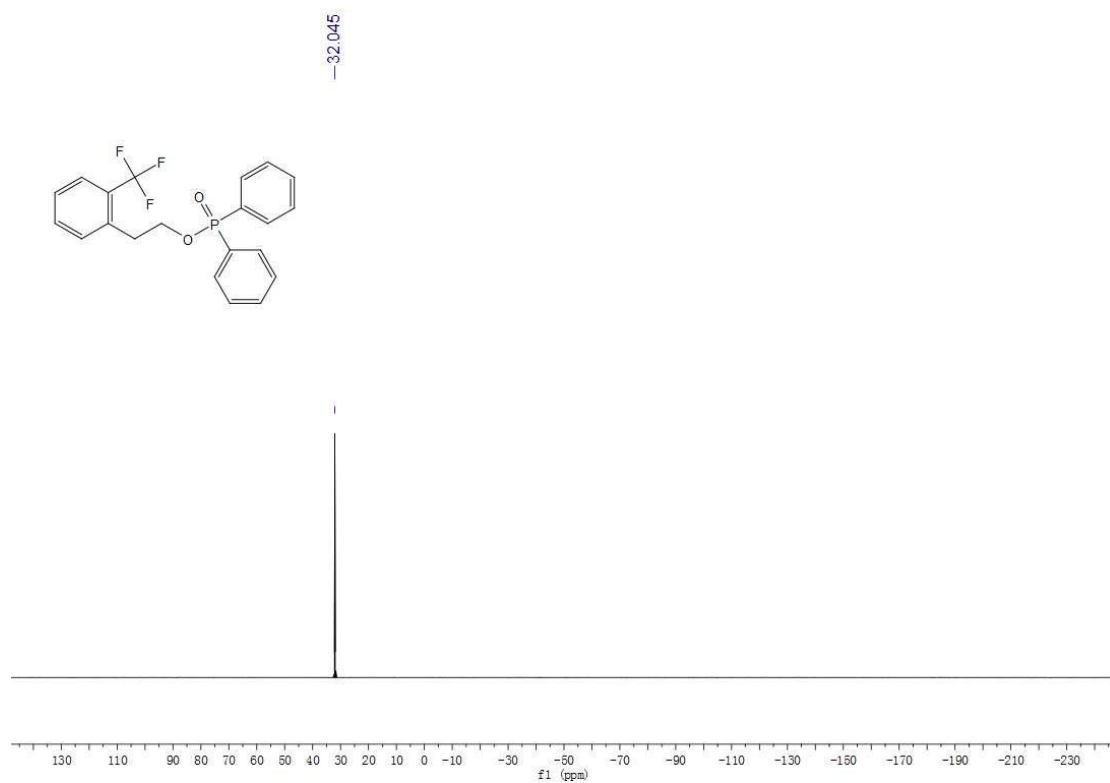

Figure 23.  $3\text{h-}^{31}\text{P}$  NMR

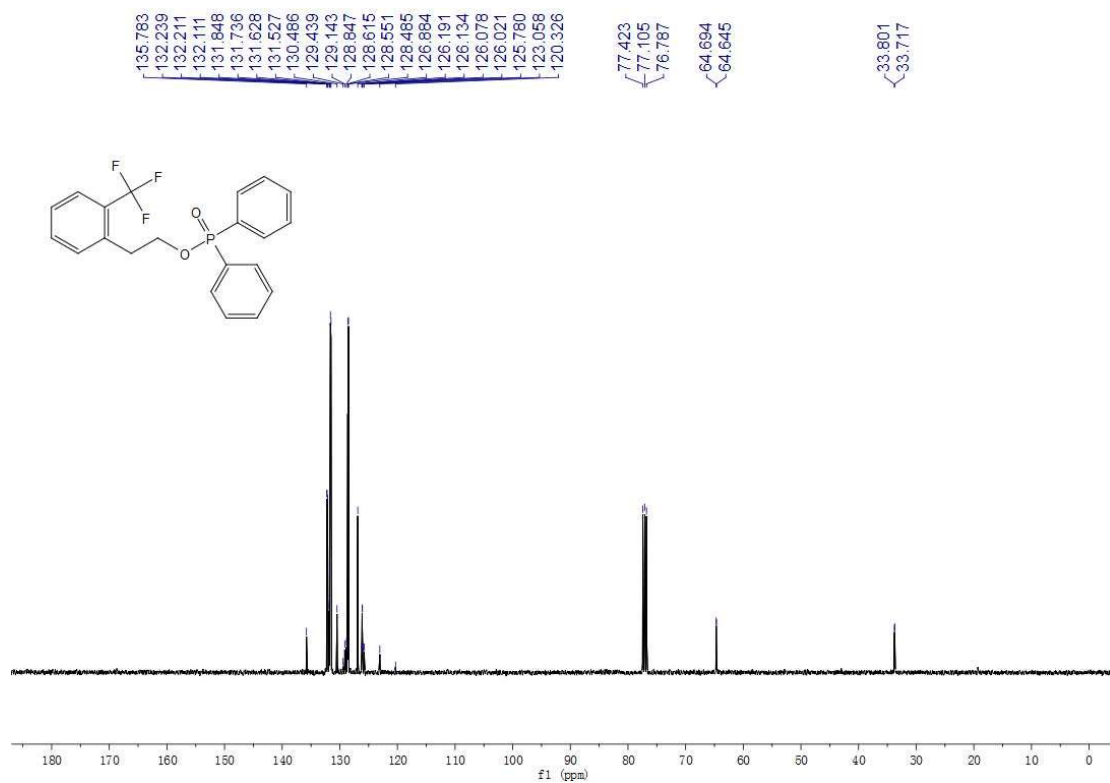

Figure 24.  $3\text{h-}^{13}\text{C}$  NMR

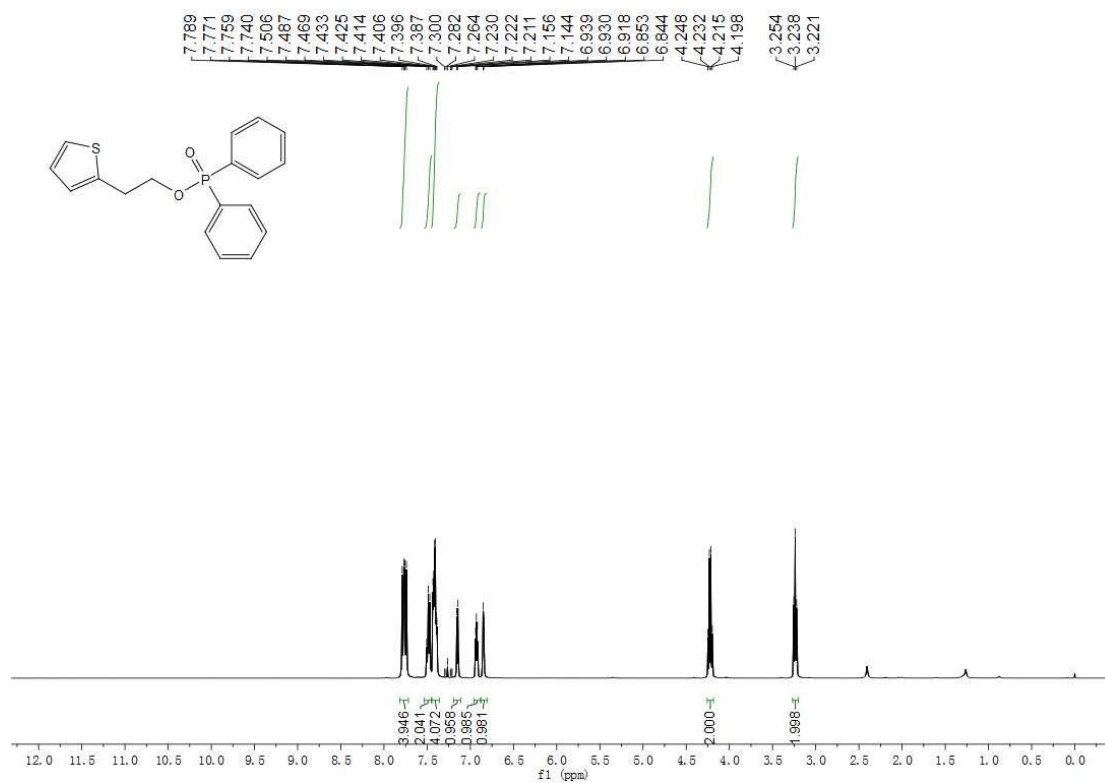

Figure 25. <sup>31</sup>H NMR

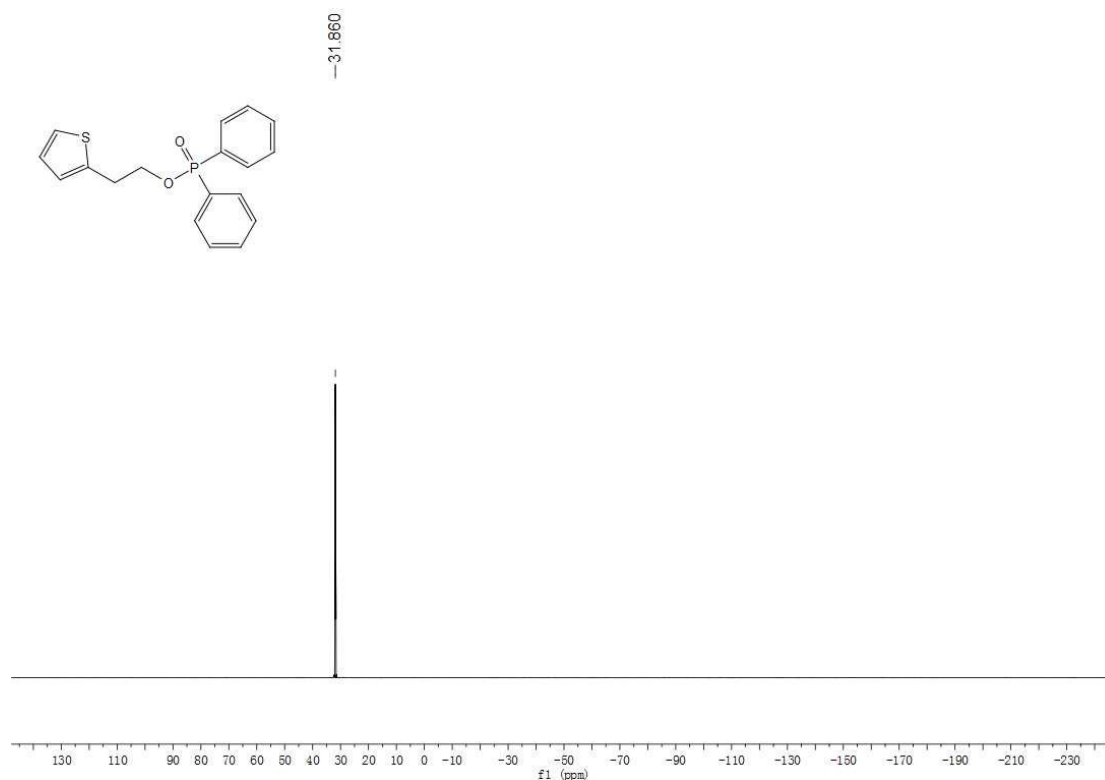

Figure 26. <sup>31</sup>P NMR

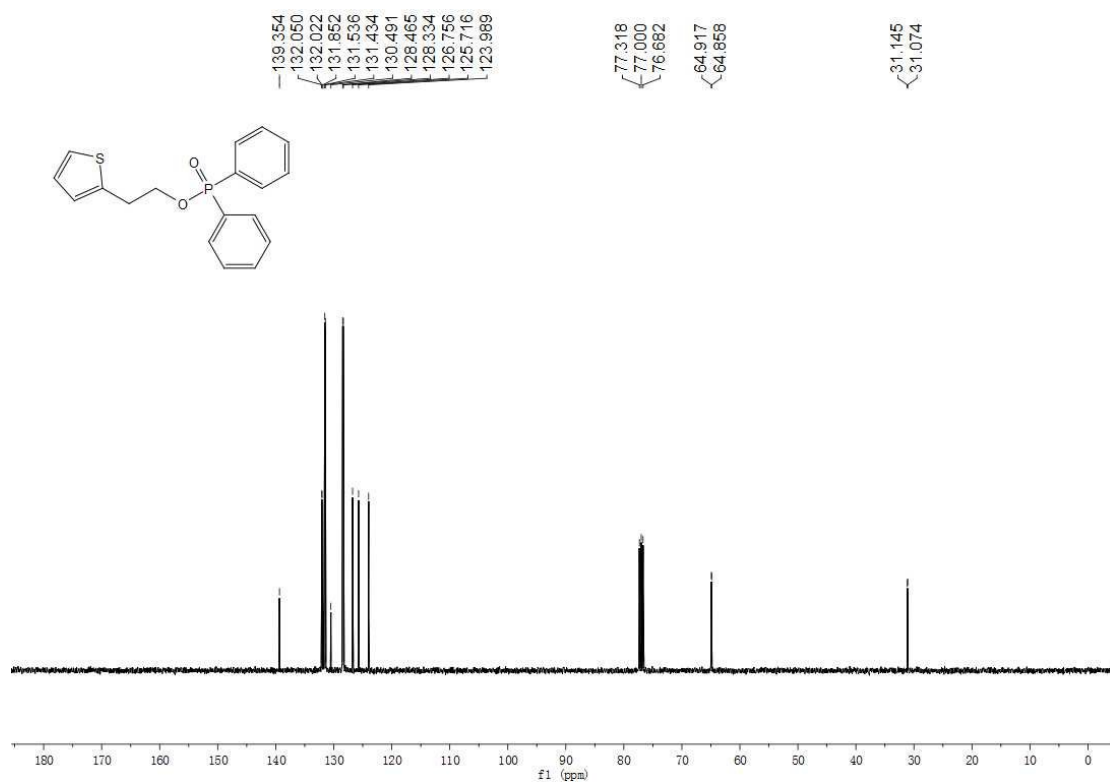

Figure 27.  $^{13}\text{C}$  NMR

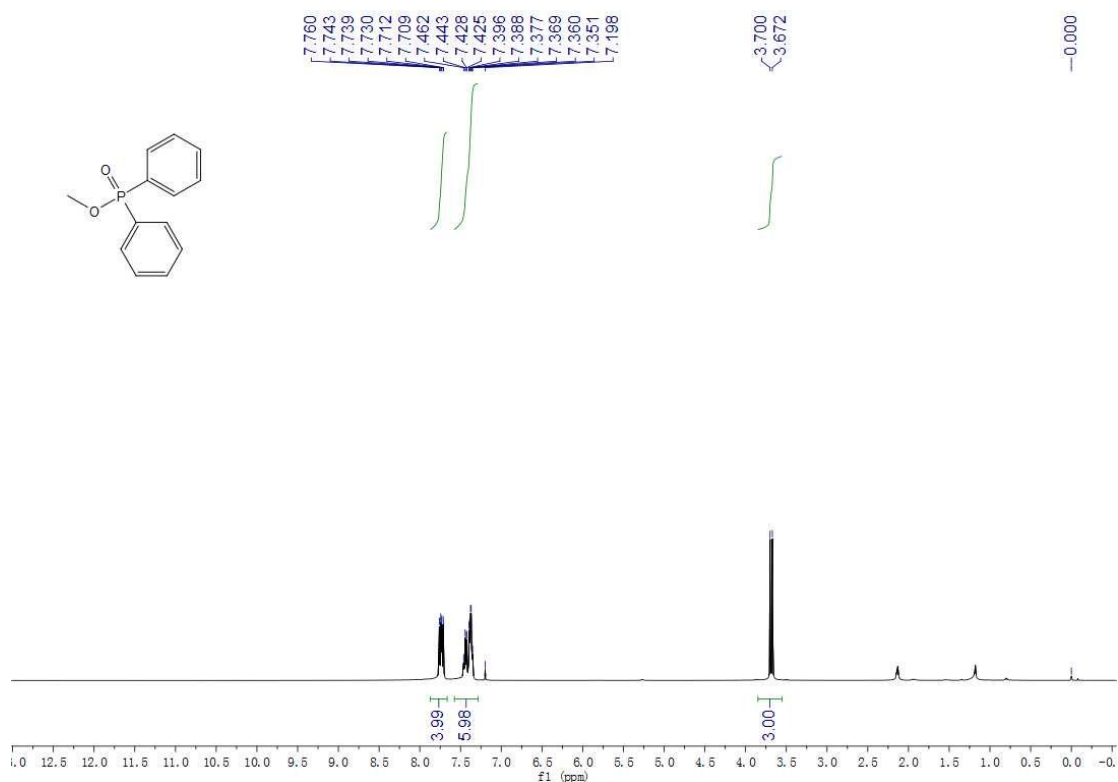

Figure 28.  $^1\text{H}$  NMR

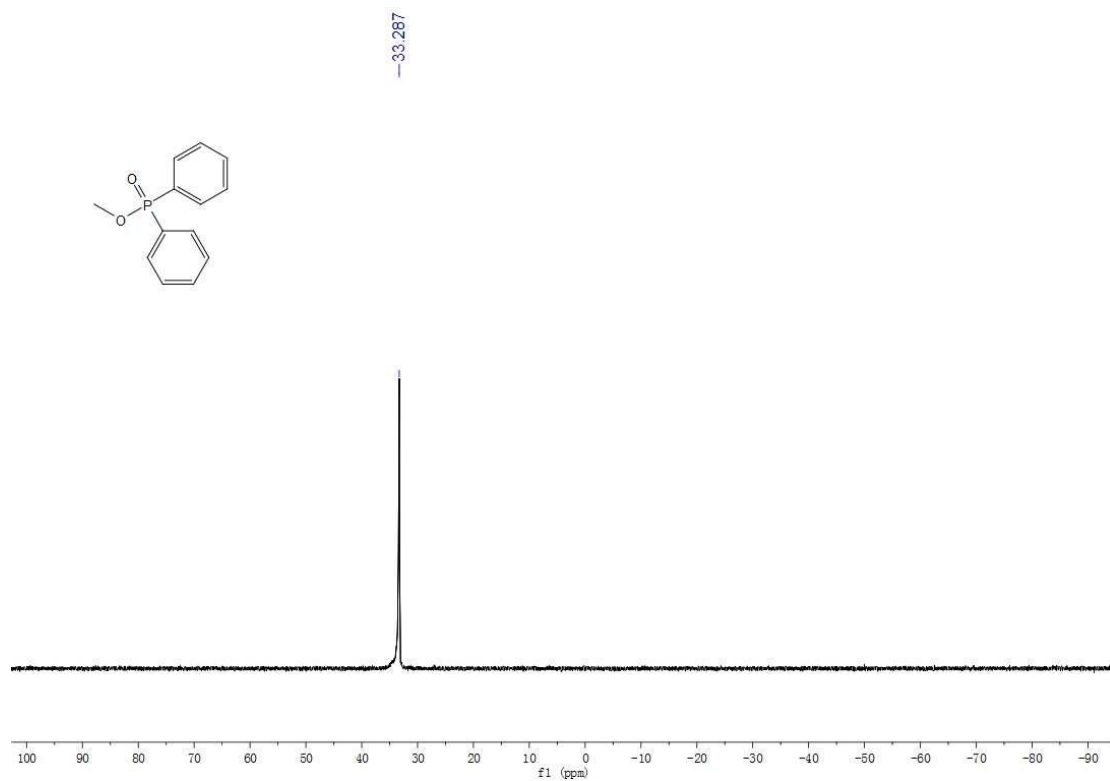

Figure 29.  $^{31}\text{P}$  NMR

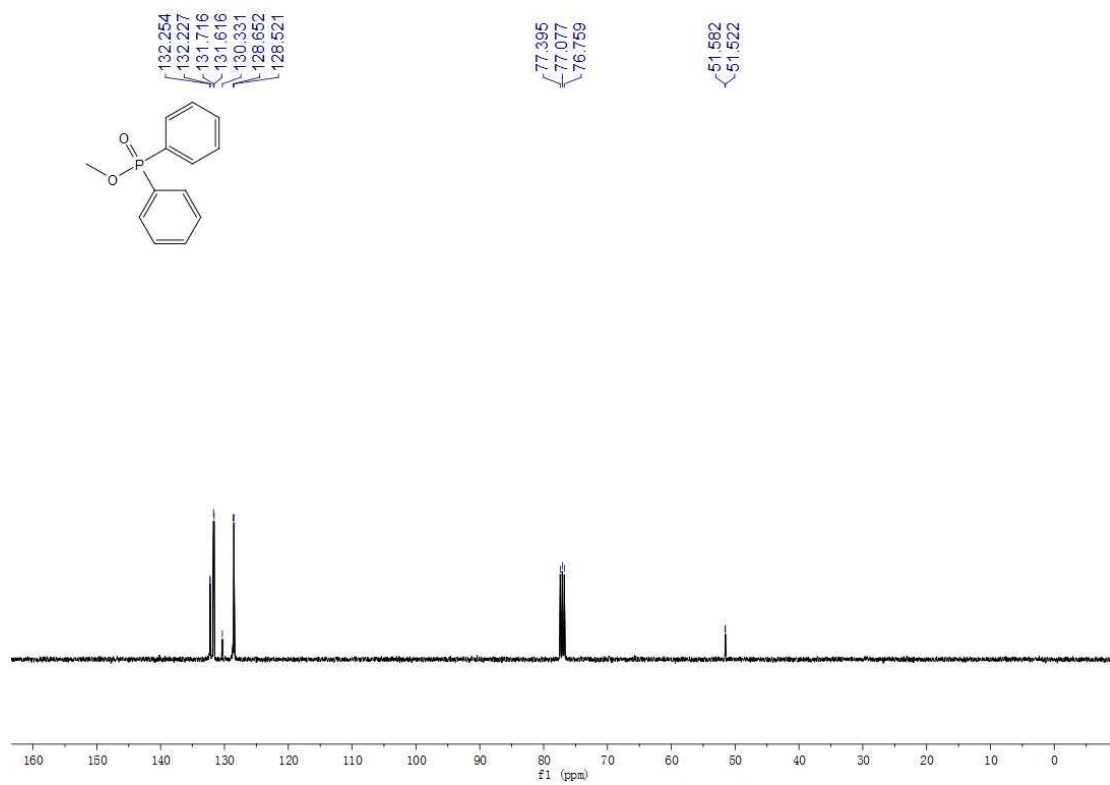

Figure 30.  $^{13}\text{C}$  NMR

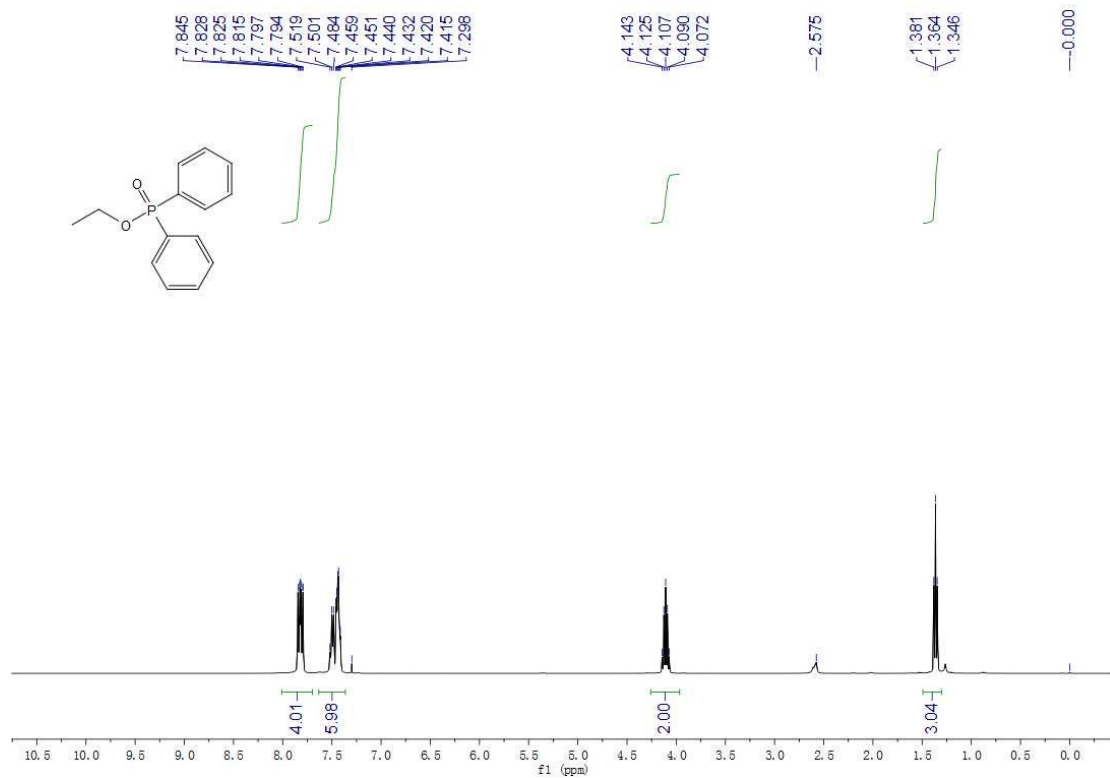

Figure 31.  $3k$ - $^1\text{H}$  NMR

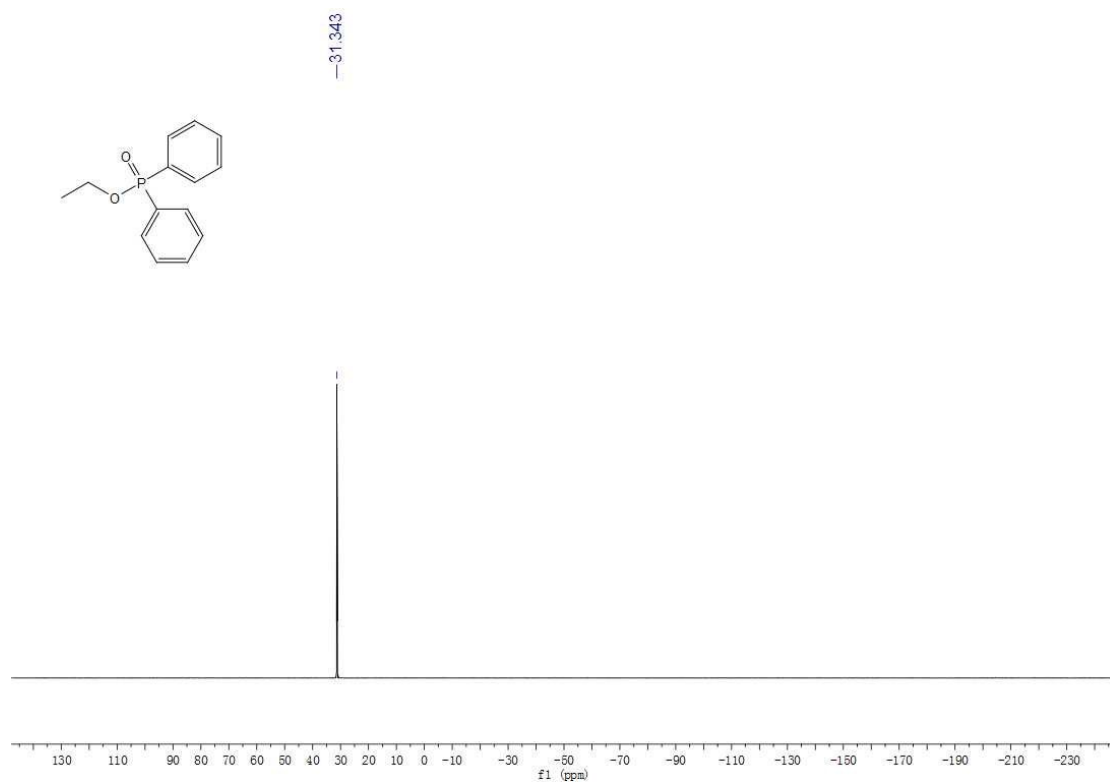

Figure 32.  $3k$ - $^{31}\text{P}$  NMR



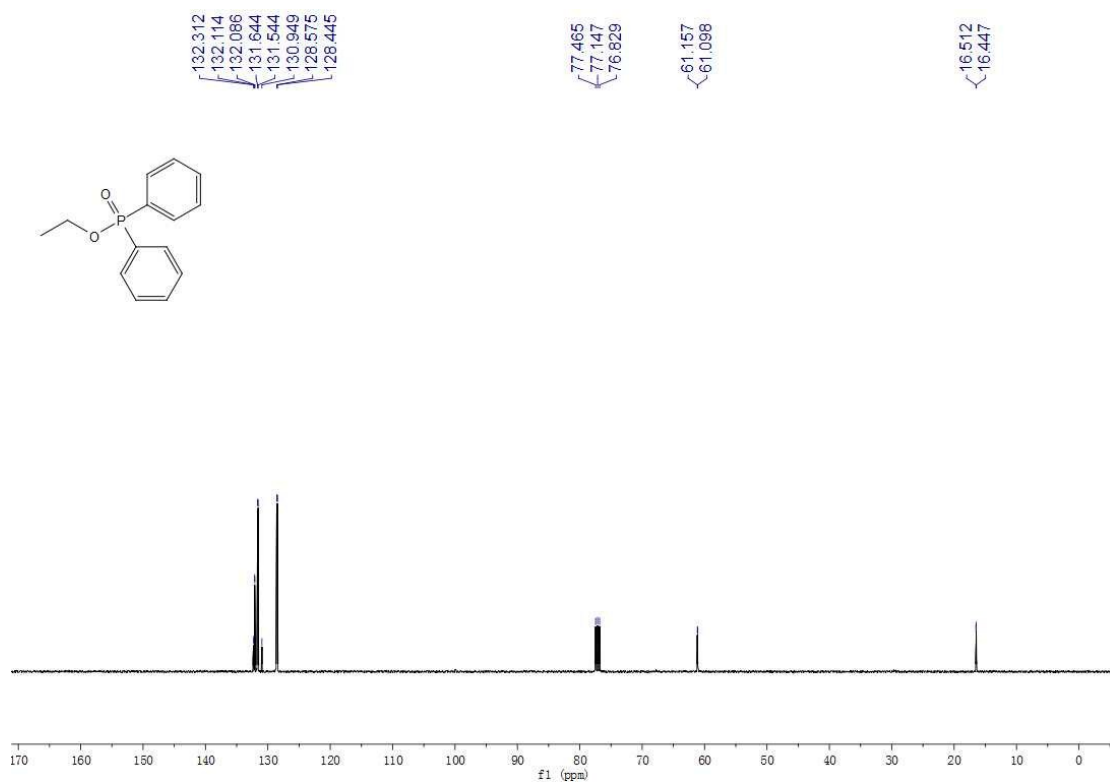

Figure 33. 3k-<sup>13</sup>C NMR

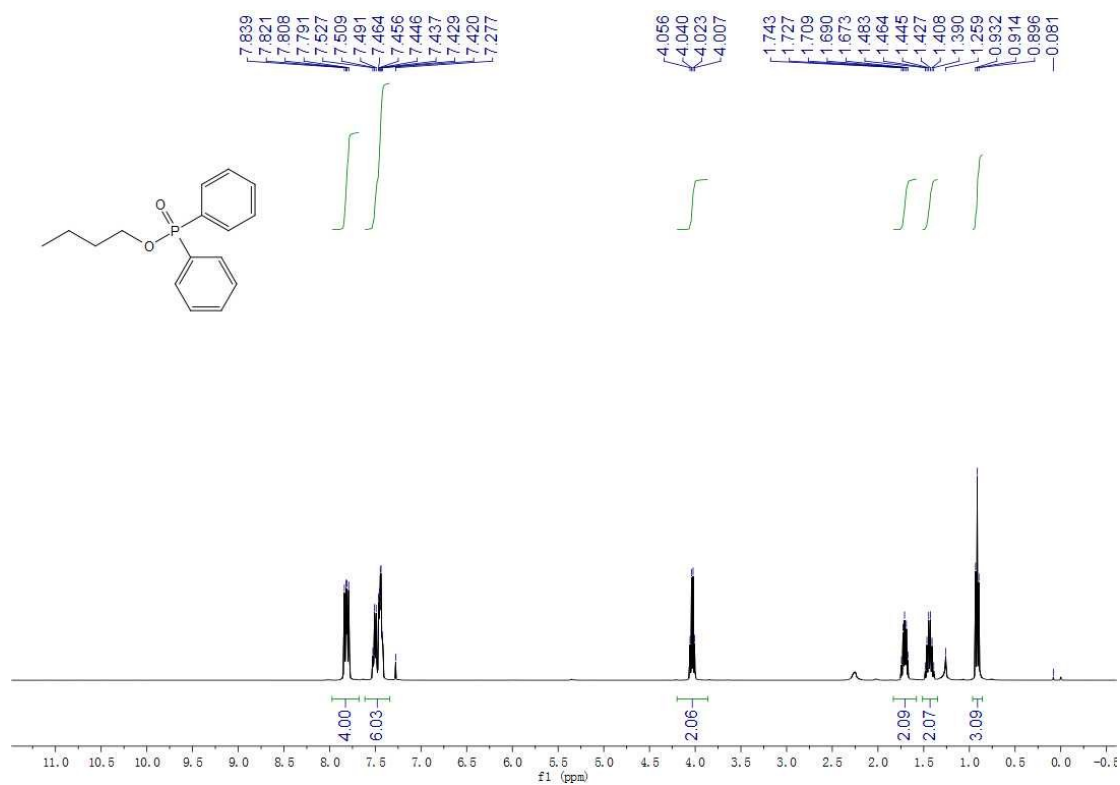

Figure 34. 3l-<sup>1</sup>H NMR

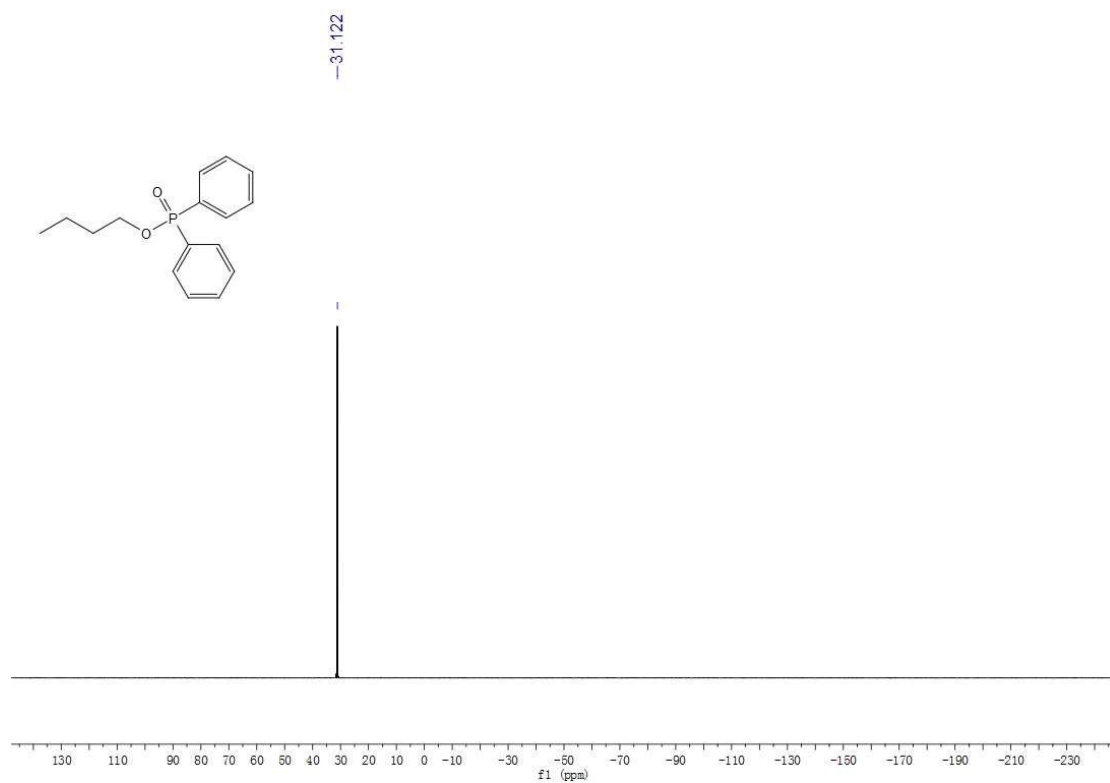

Figure 35.  $^{31}\text{P}$  NMR

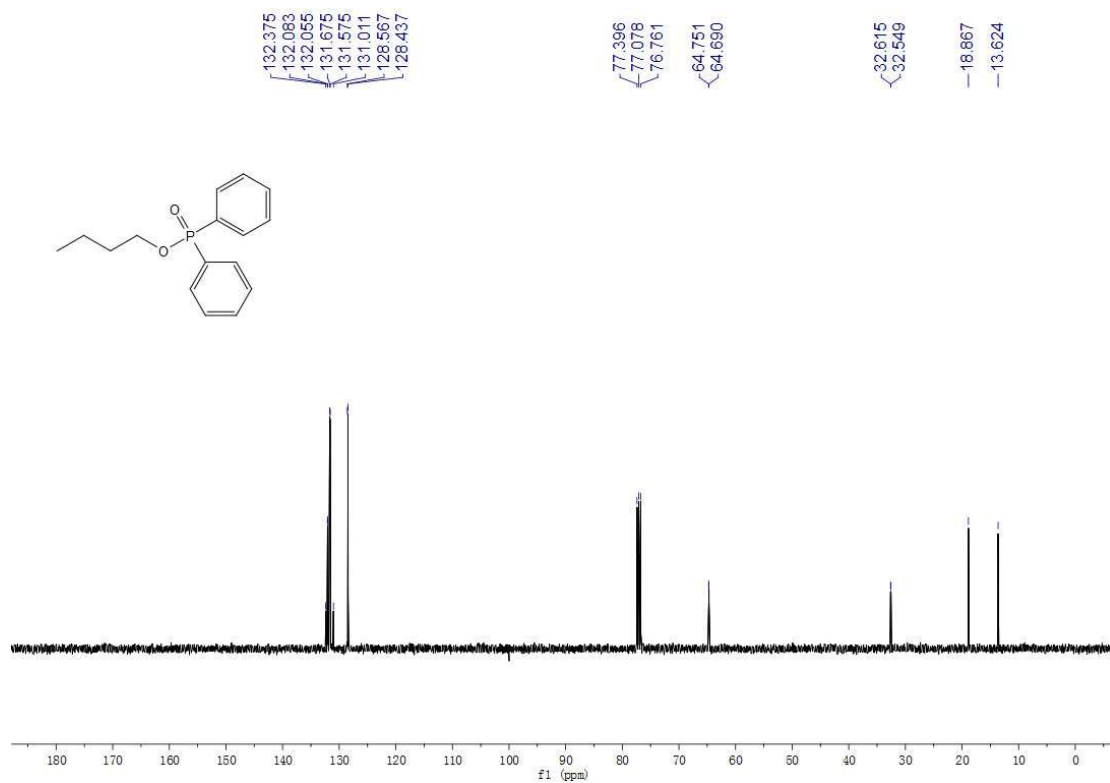

Figure 36.  $^{13}\text{C}$  NMR

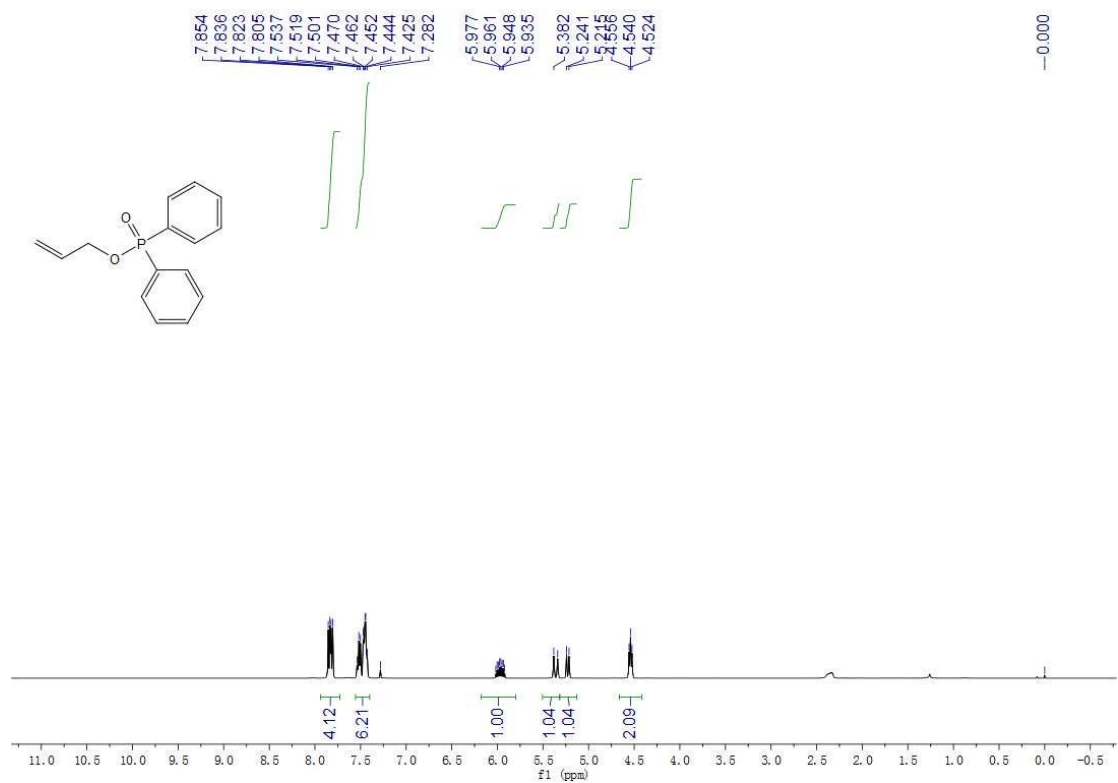

Figure 37.  $3m\text{-}^1\text{H}$  NMR

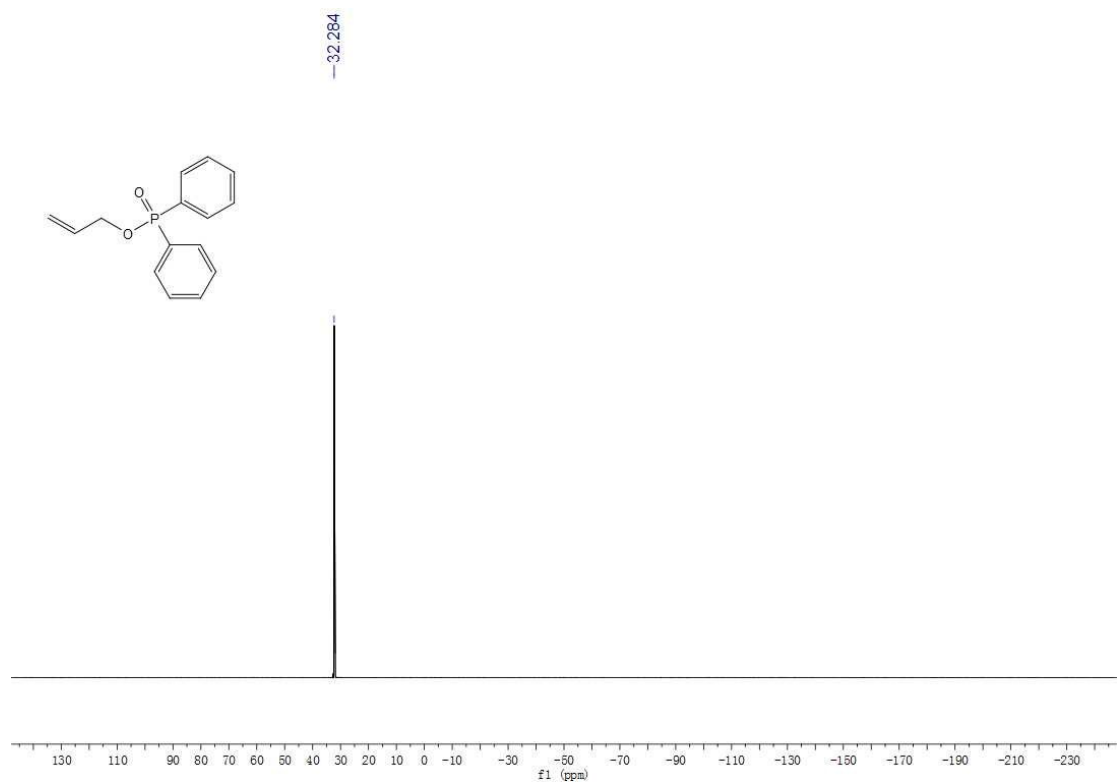

Figure 38.  $3m\text{-}^{31}\text{P}$  NMR

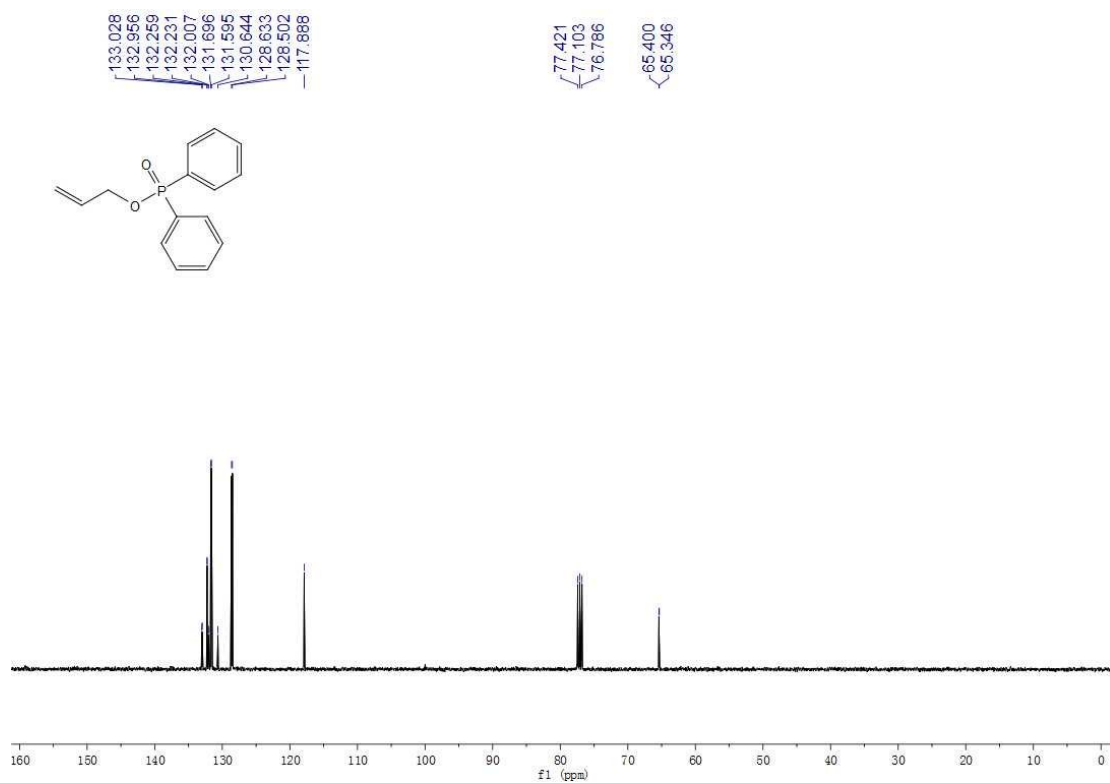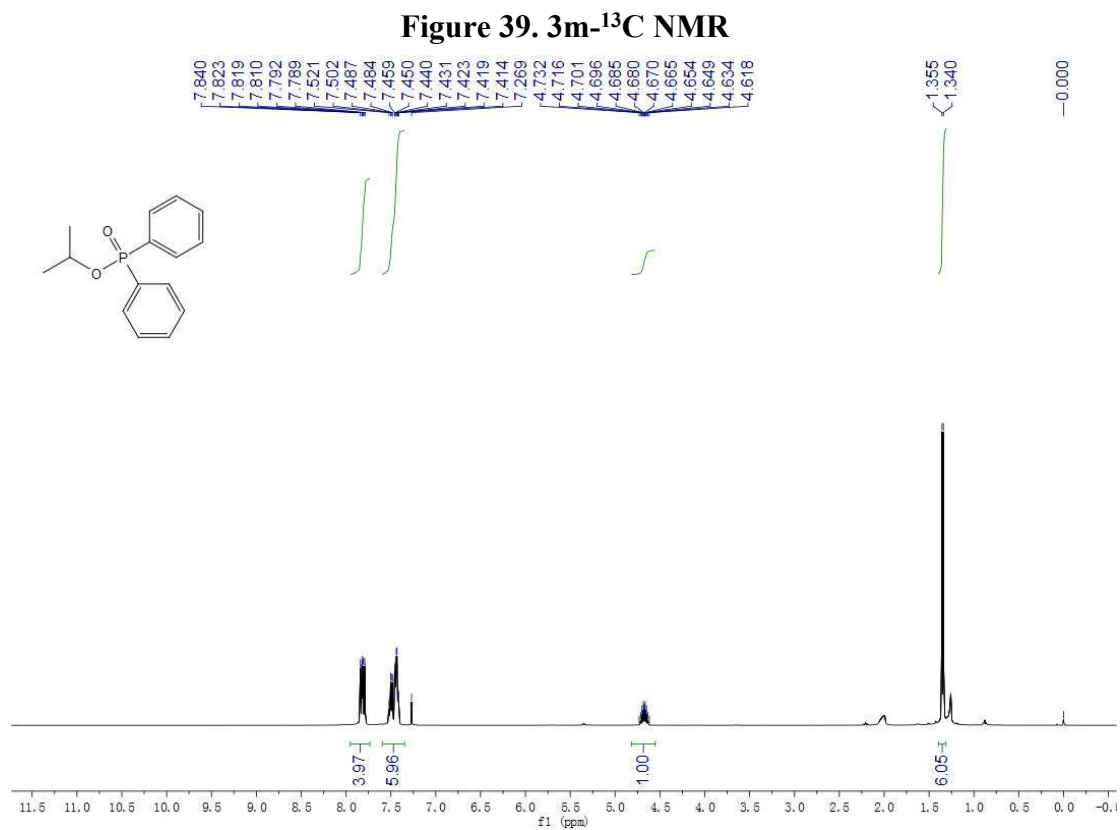

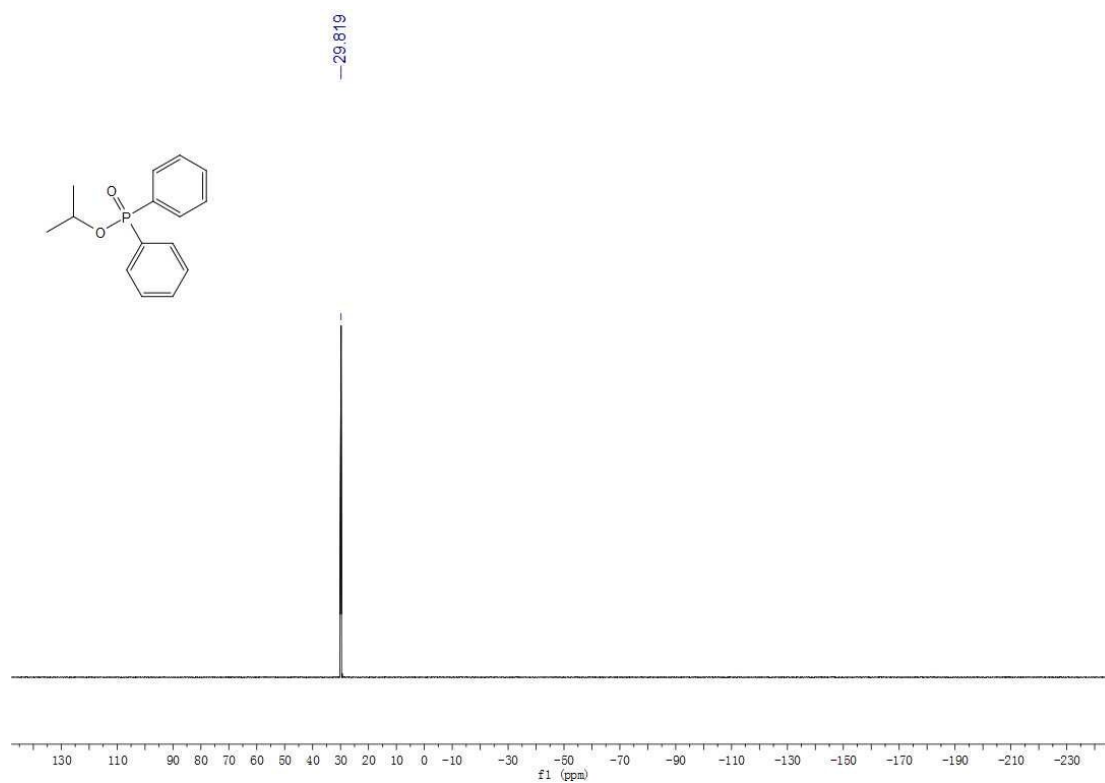

Figure 41. 3n-<sup>31</sup>P NMR

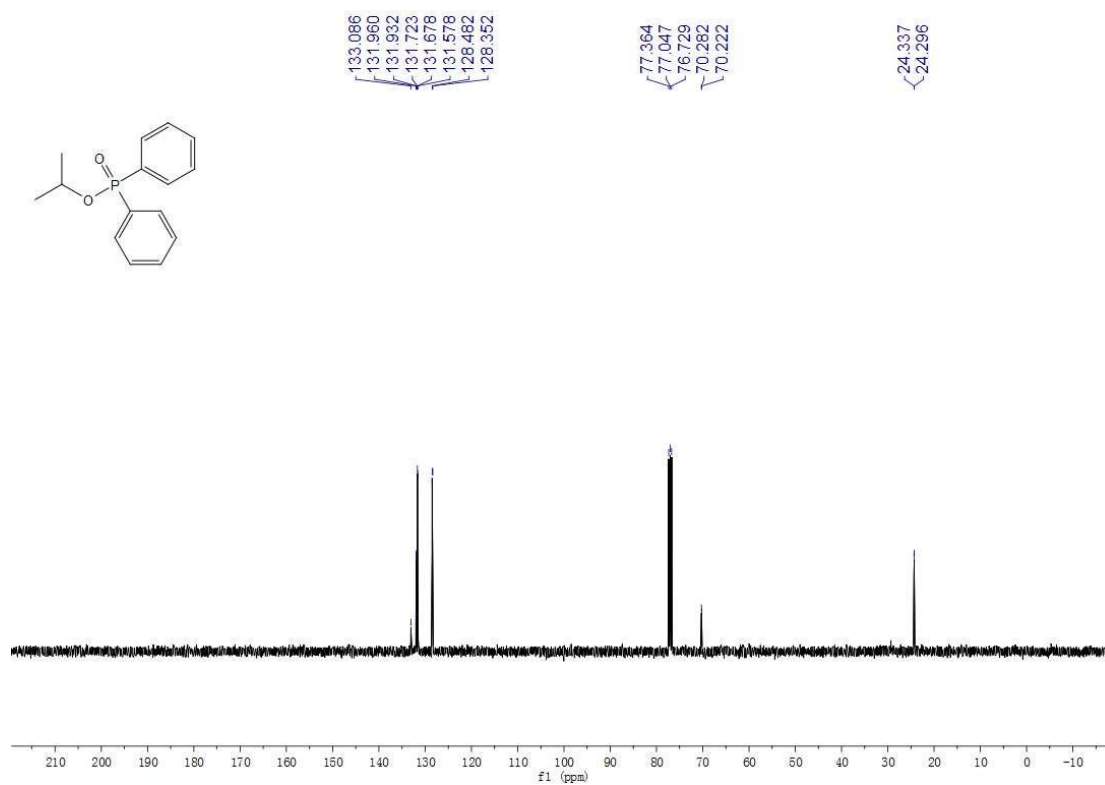

Figure 42. 3n-<sup>13</sup>C NMR

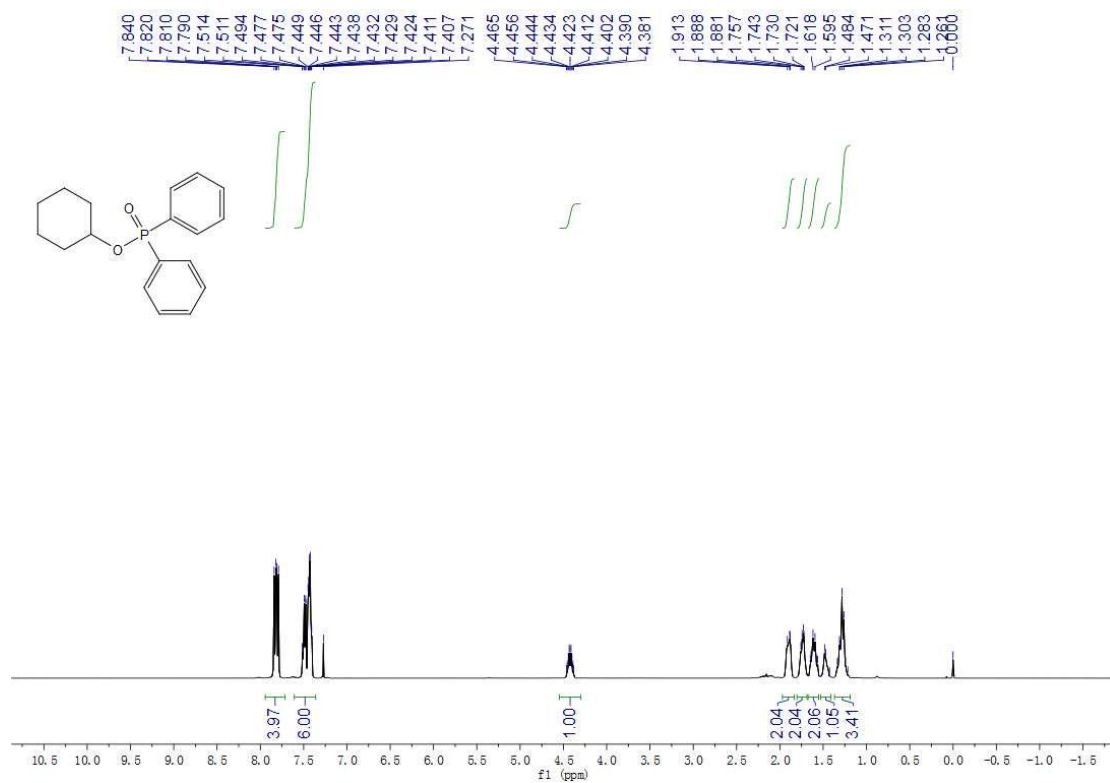

Figure 43.  $30\text{-}^1\text{H}$  NMR

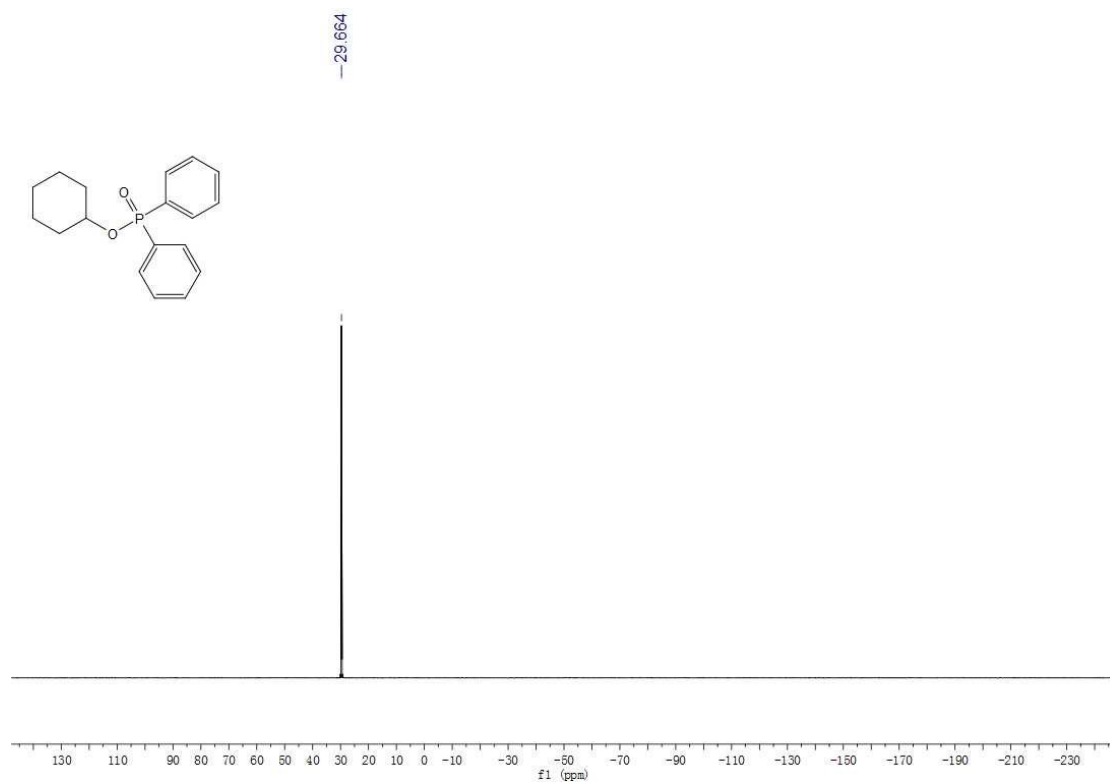

Figure 44.  $30\text{-}^{31}\text{P}$  NMR

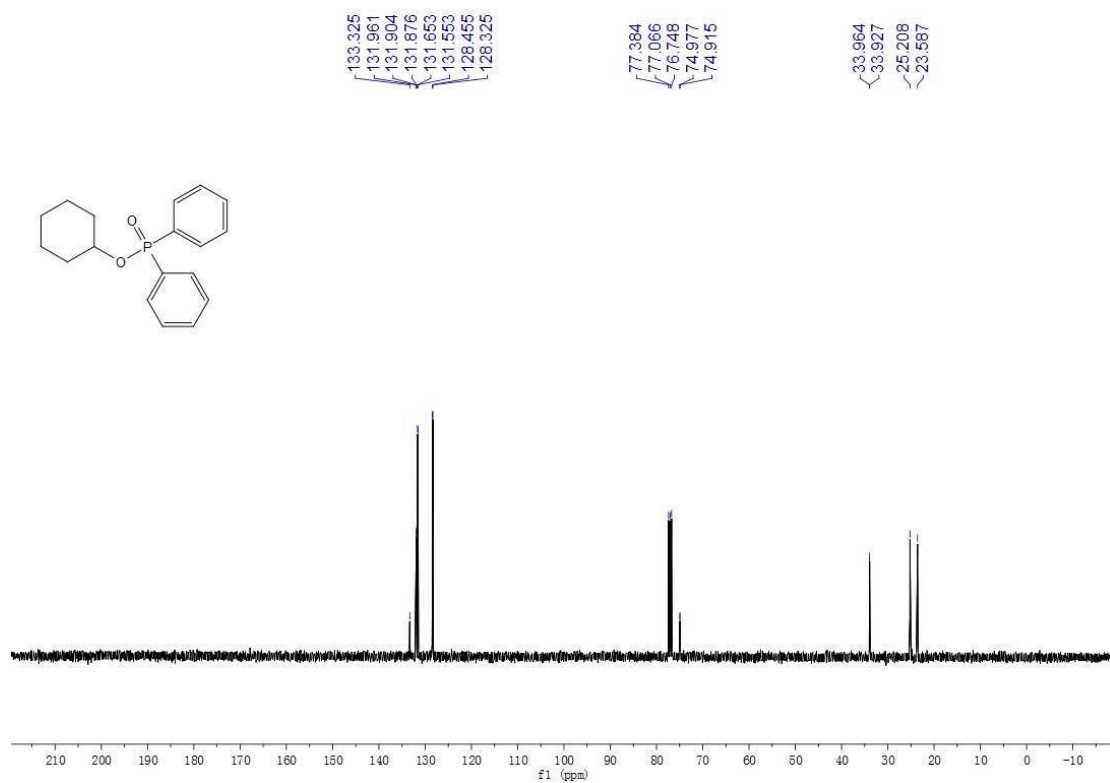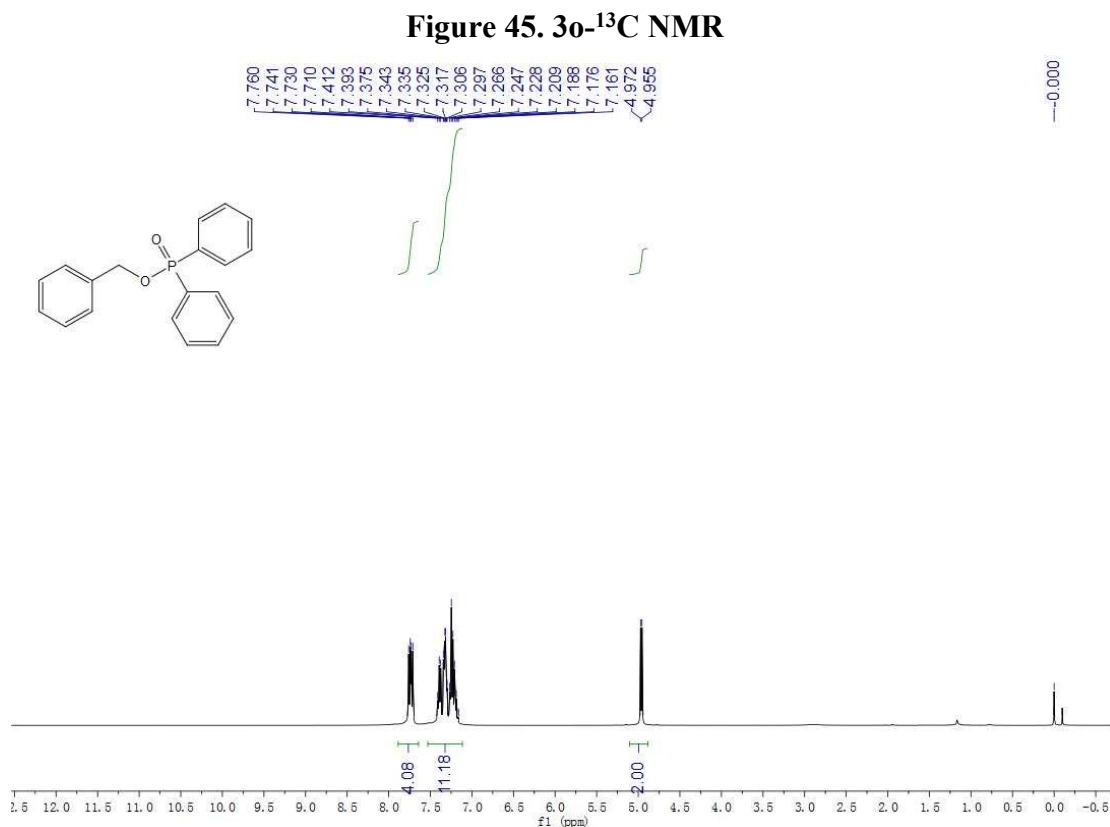

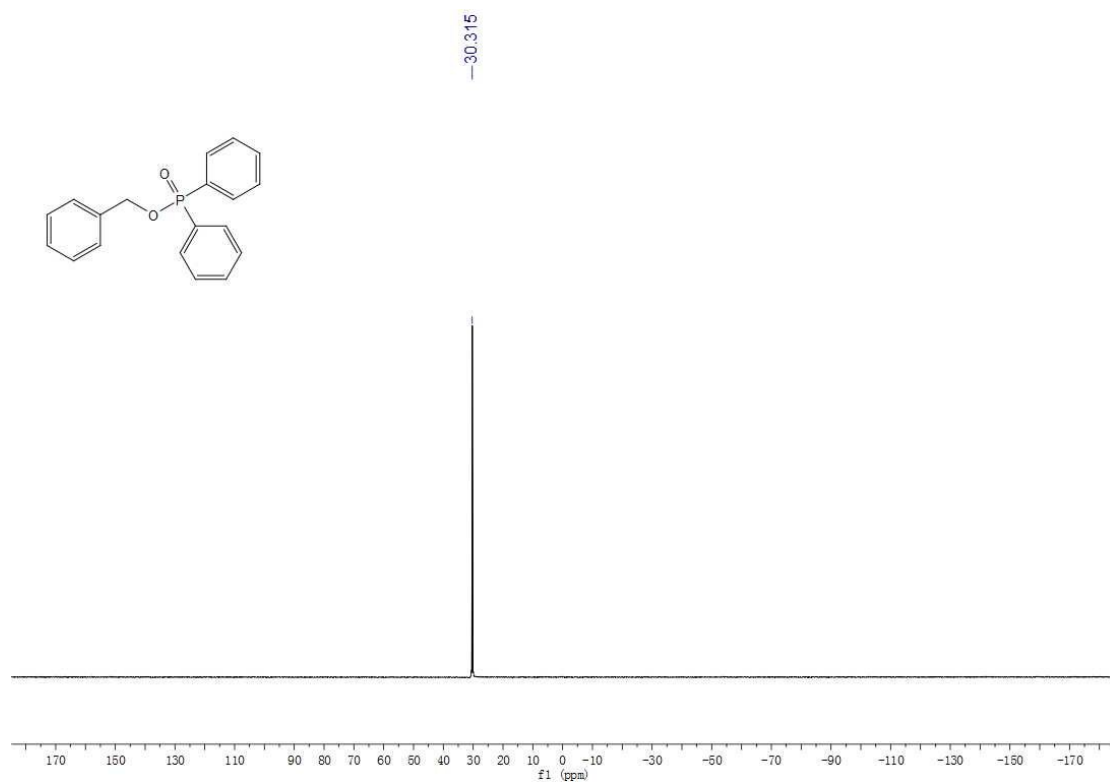

Figure 47.  $31\text{P}$  NMR

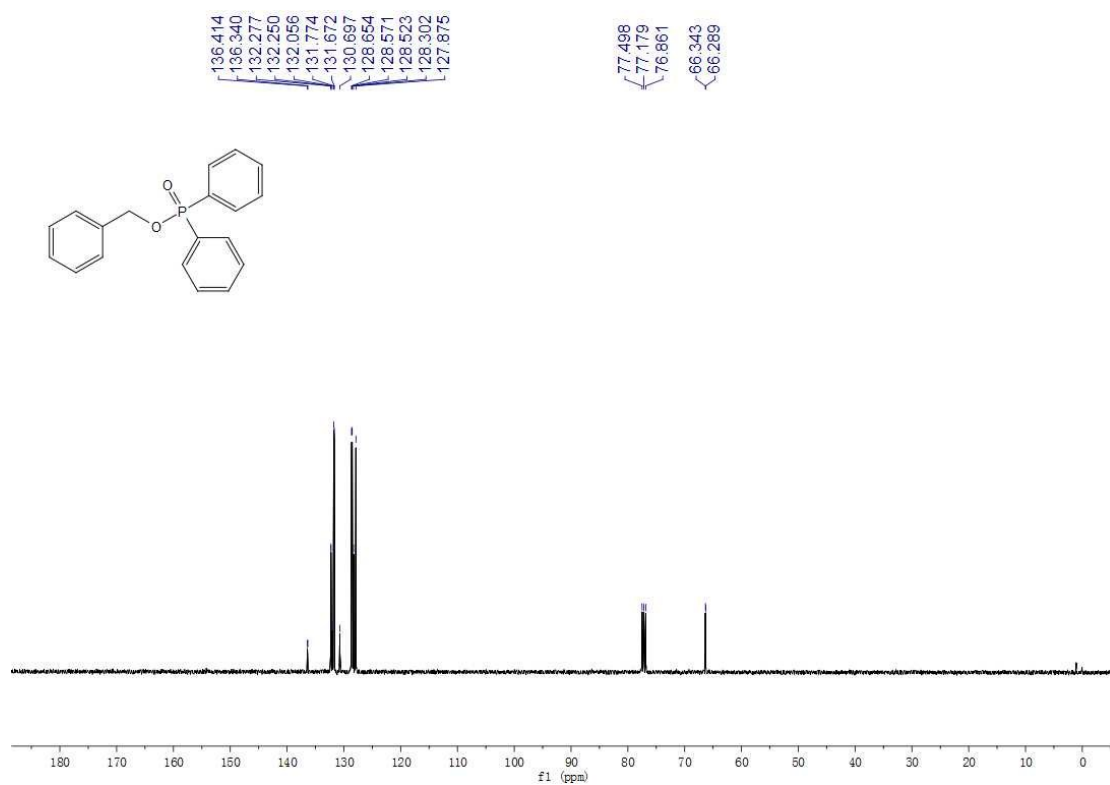

Figure 48.  $13\text{C}$  NMR



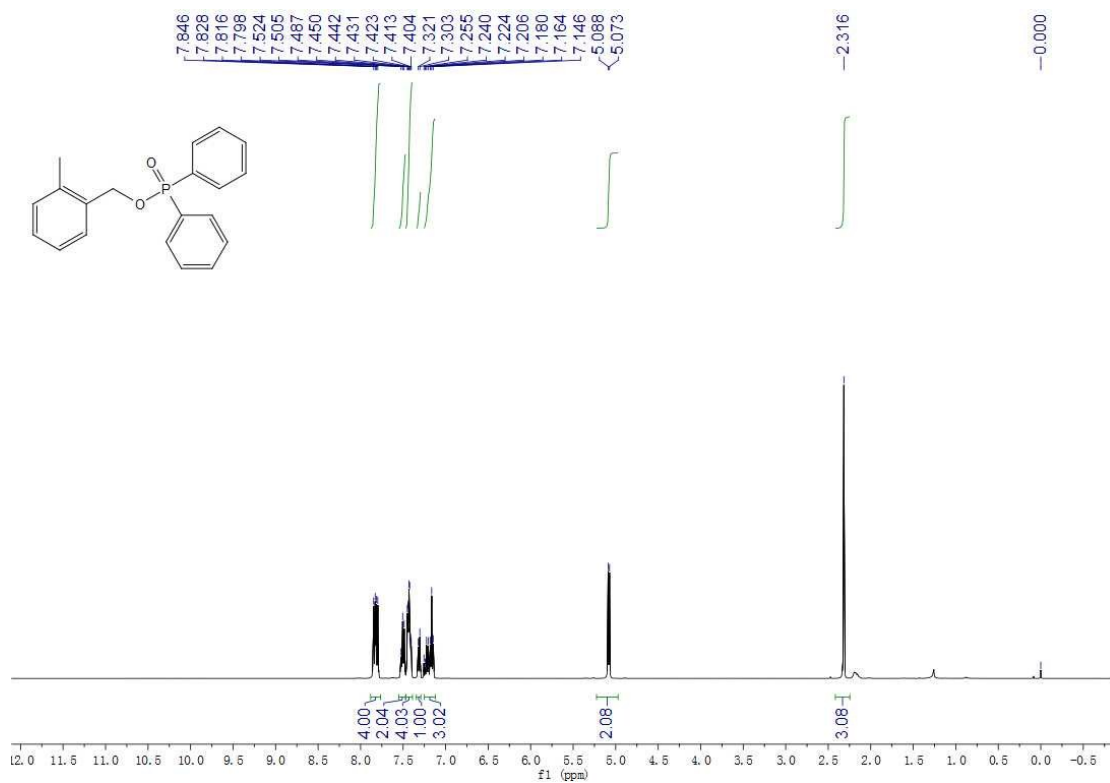

Figure 49. 3q-<sup>1</sup>H NMR

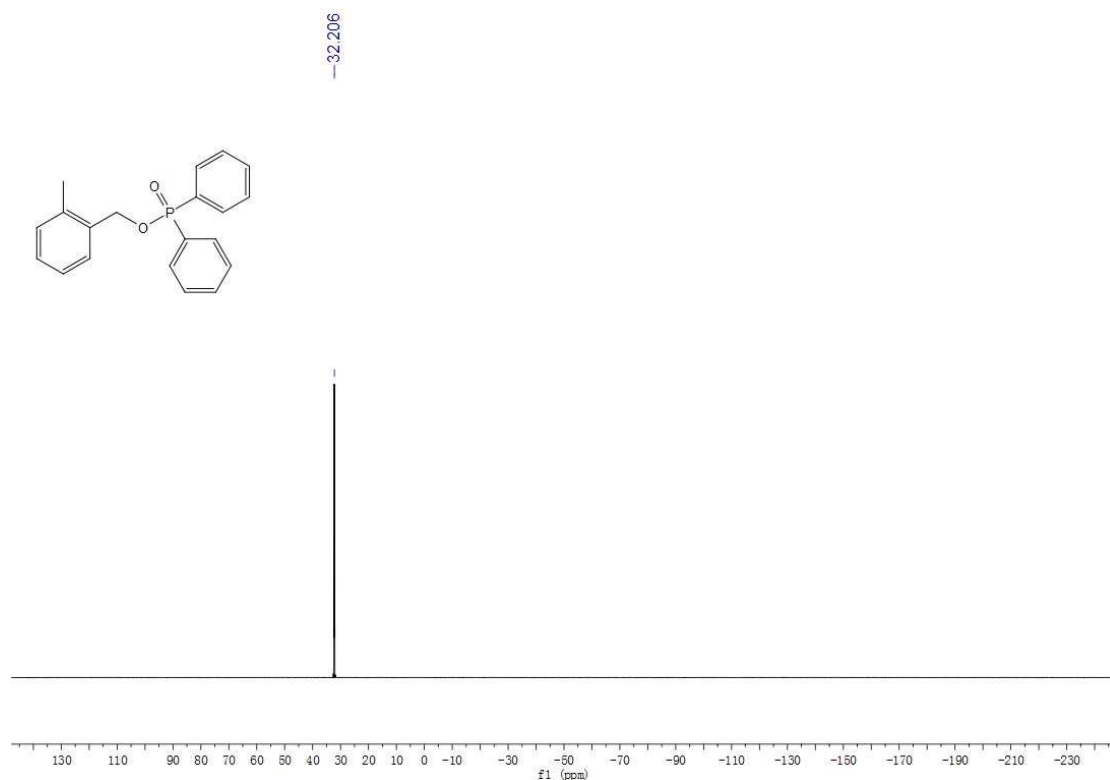

Figure 50. 3q-<sup>31</sup>P NMR

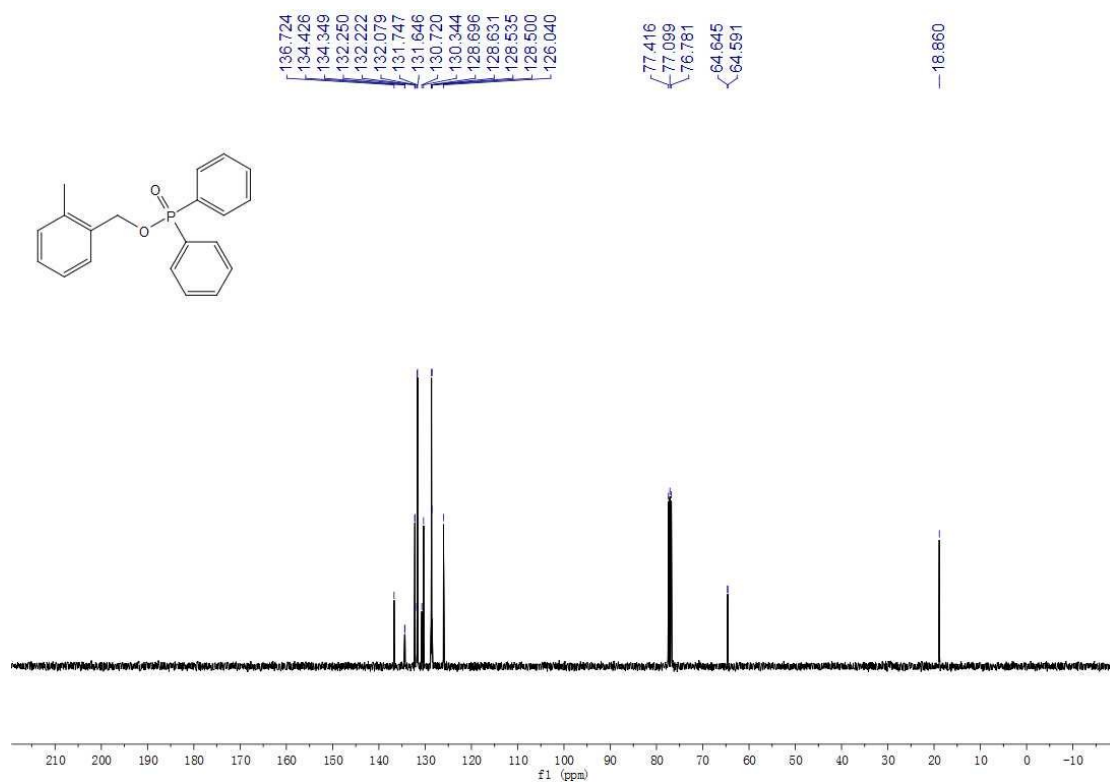

Figure 51. 3q- $^{13}\text{C}$  NMR

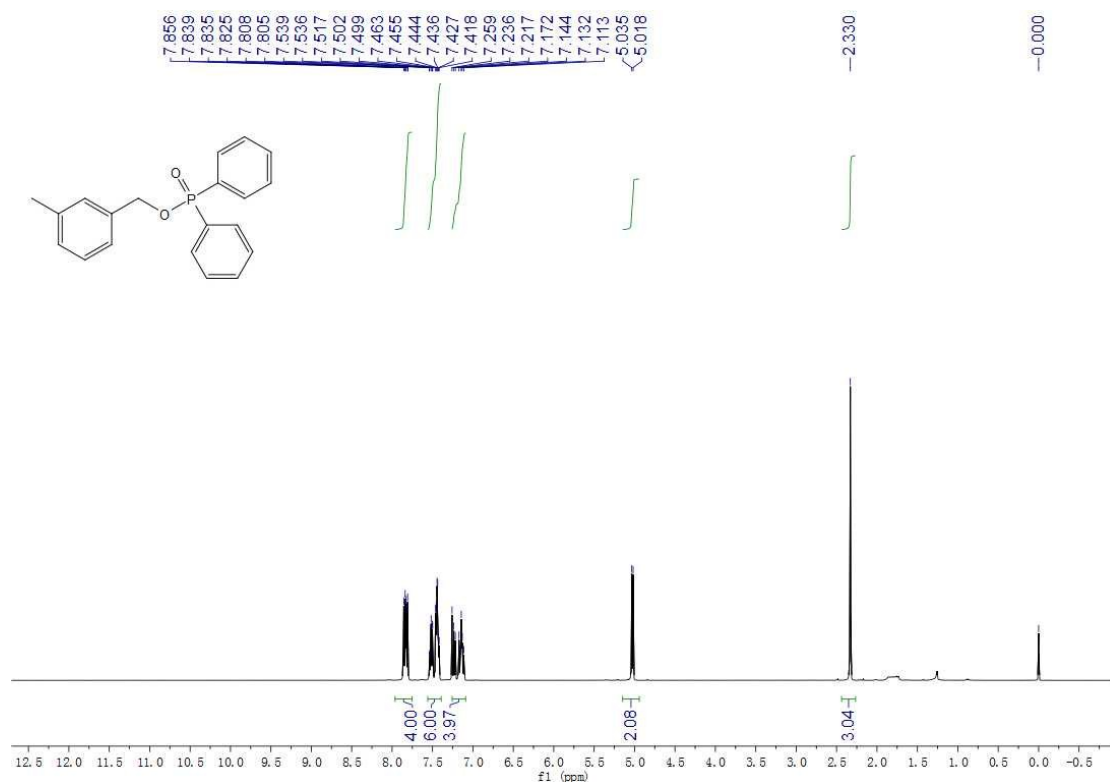

Figure 52. 3r- $^1\text{H}$  NMR

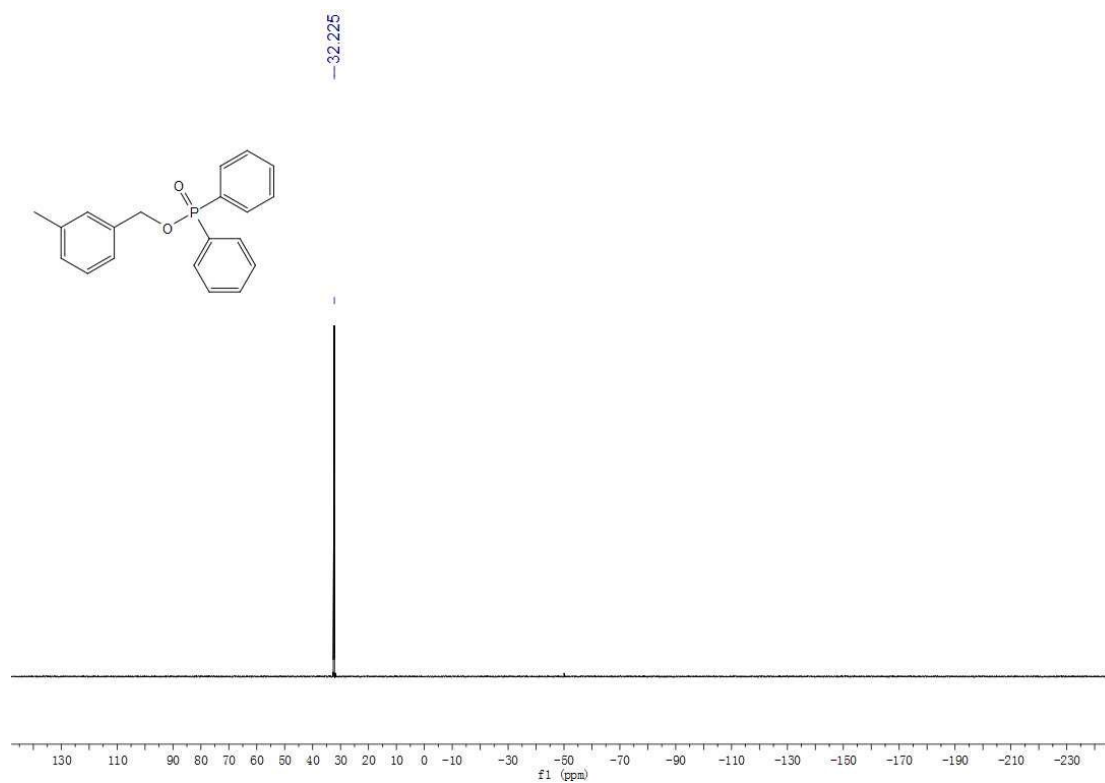

Figure 53.  $3r$ - $^{31}\text{P}$  NMR

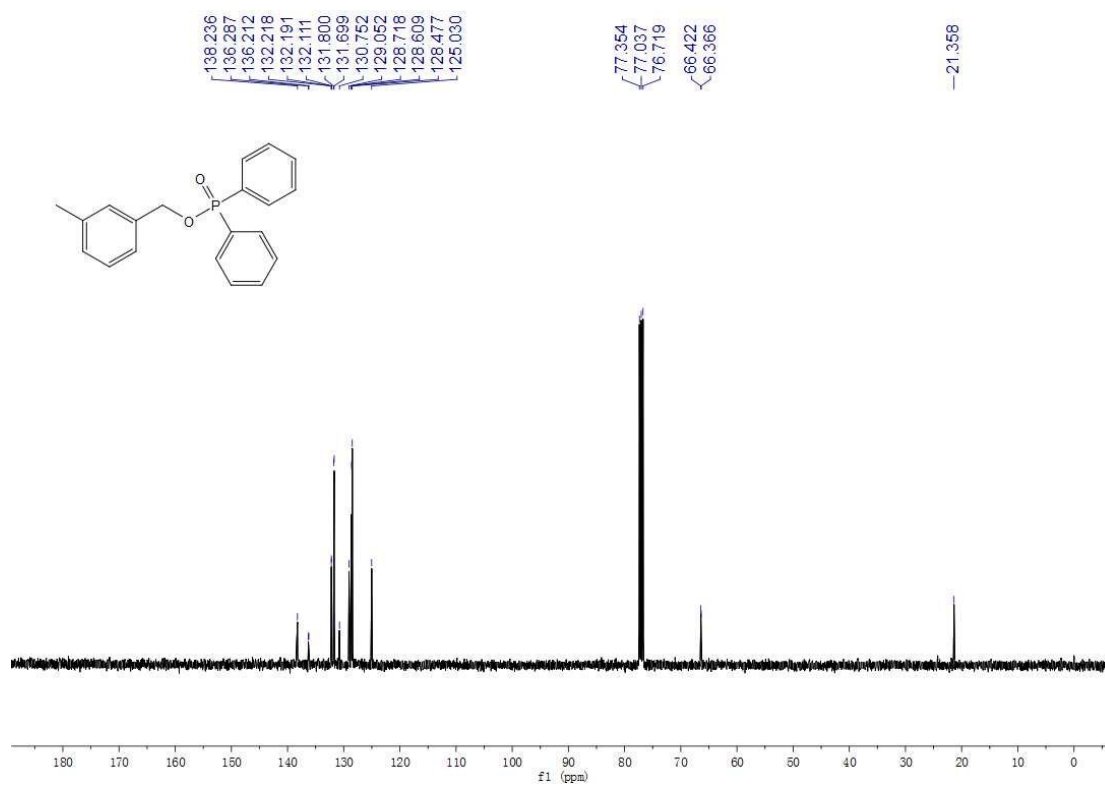

Figure 54.  $3r$ - $^{13}\text{C}$  NMR

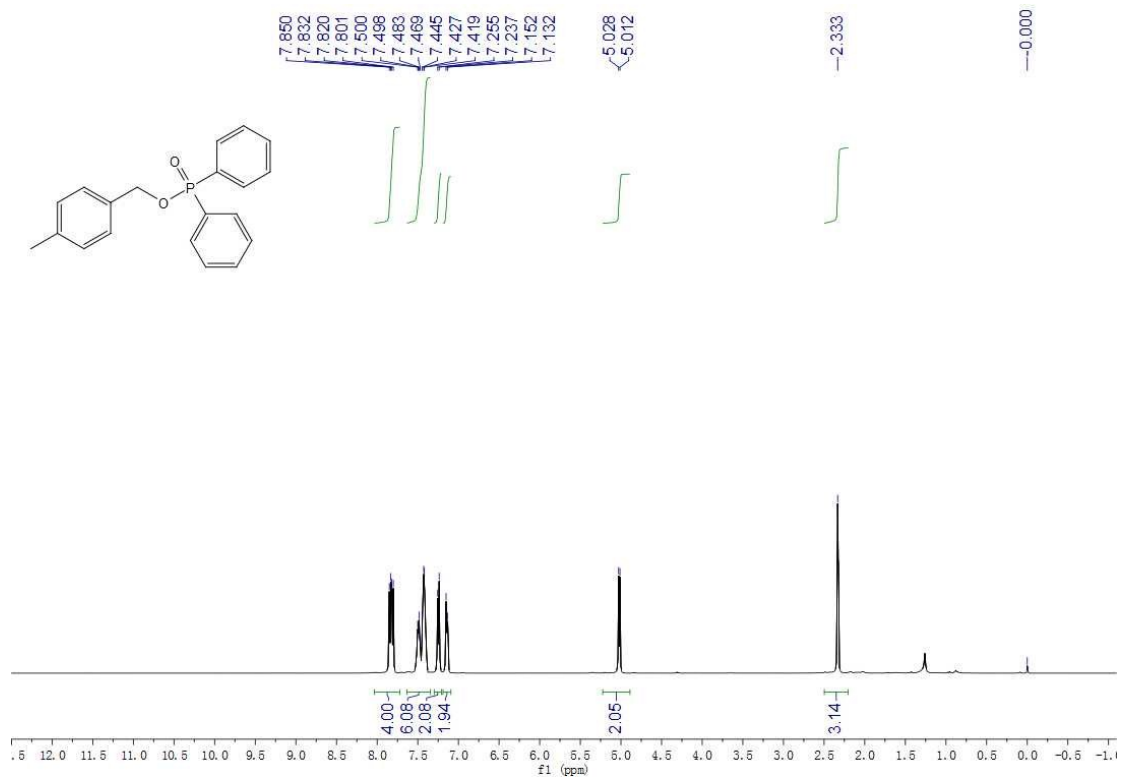

Figure 55.  $3s\text{-}^1\text{H}$  NMR

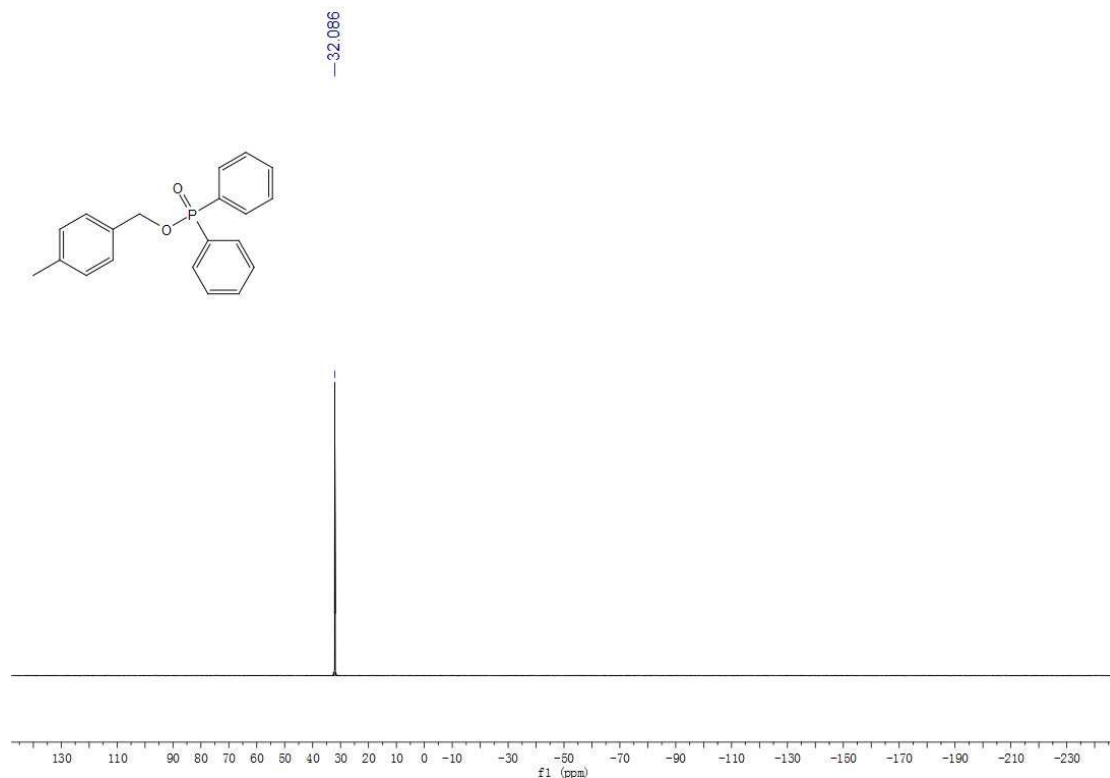

Figure 56.  $3s\text{-}^{31}\text{P}$  NMR

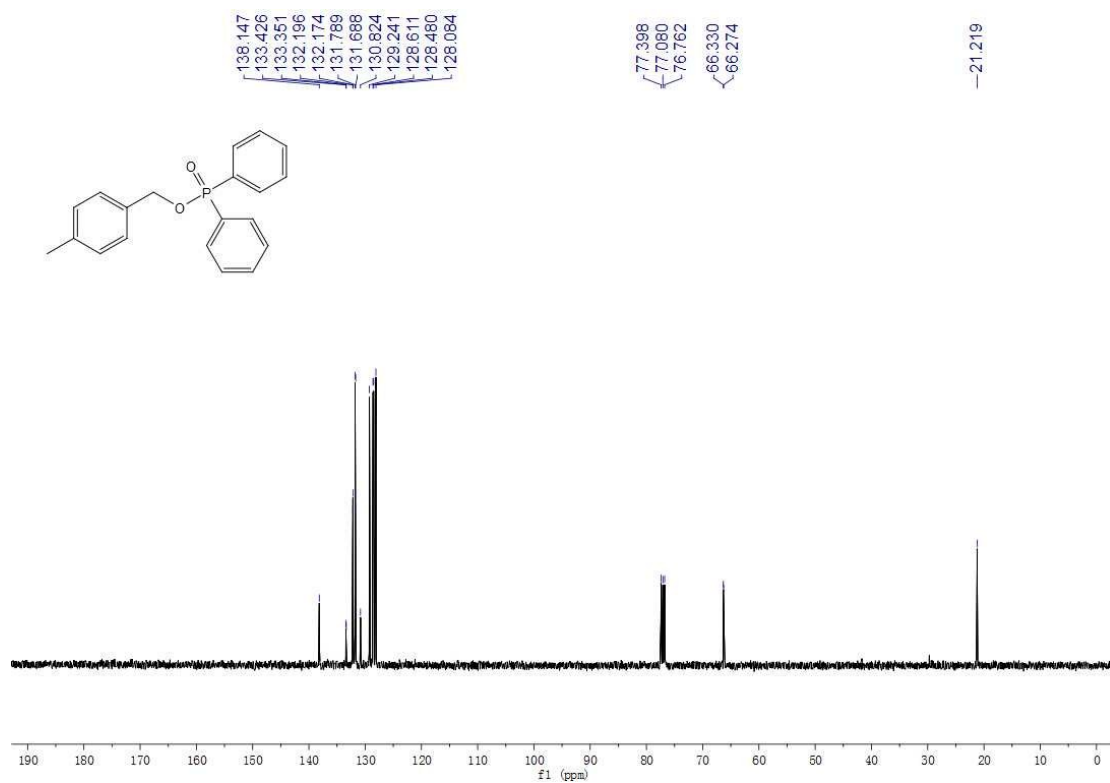

Figure 57.  $^{13}\text{C}$ -NMR

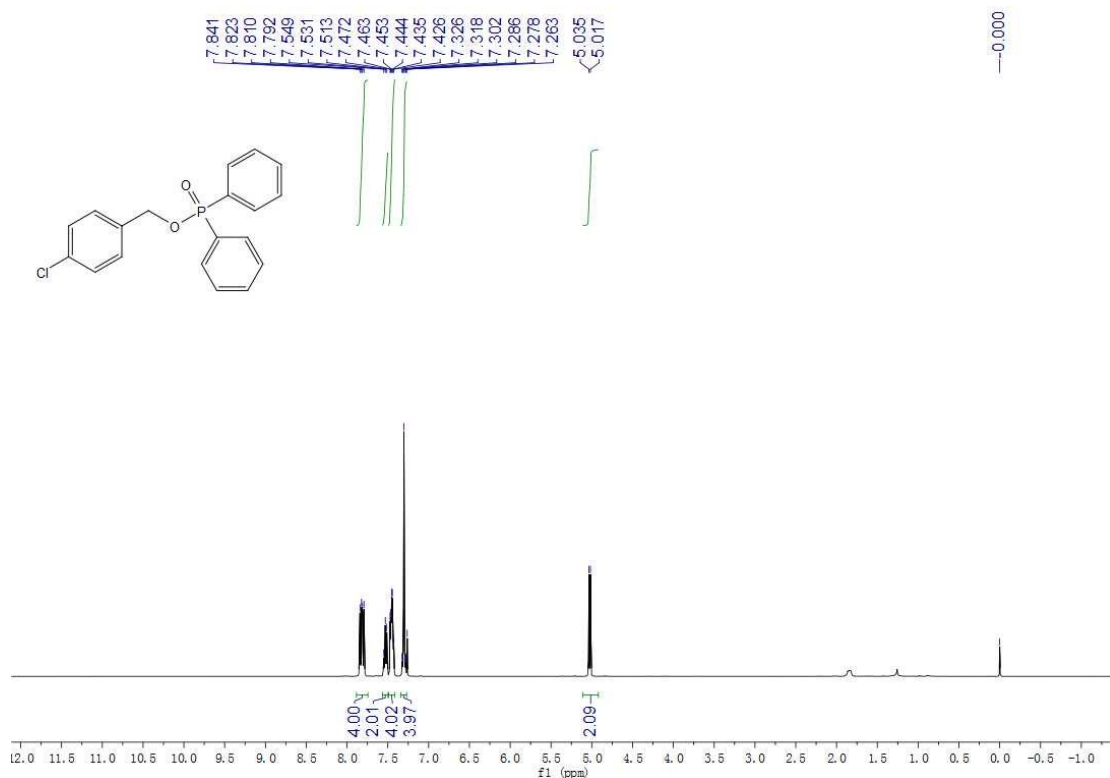

Figure 58.  $^1\text{H}$ -NMR

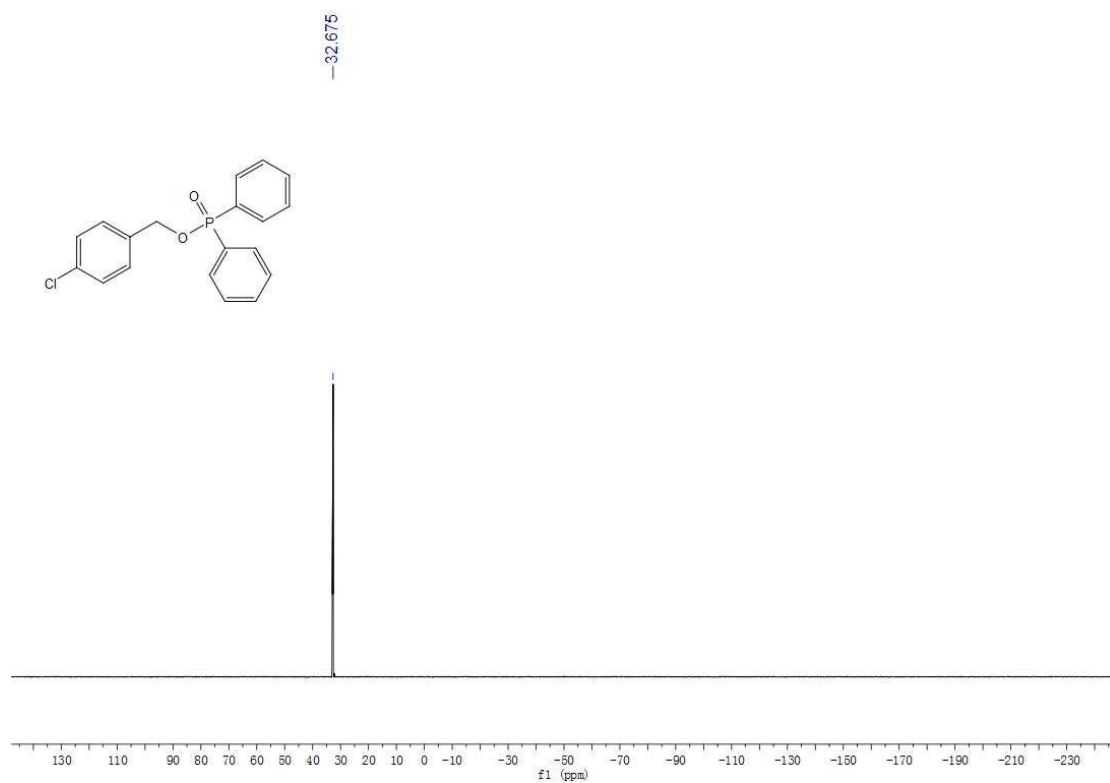

Figure 59.  $3t$ - $^{31}\text{P}$  NMR

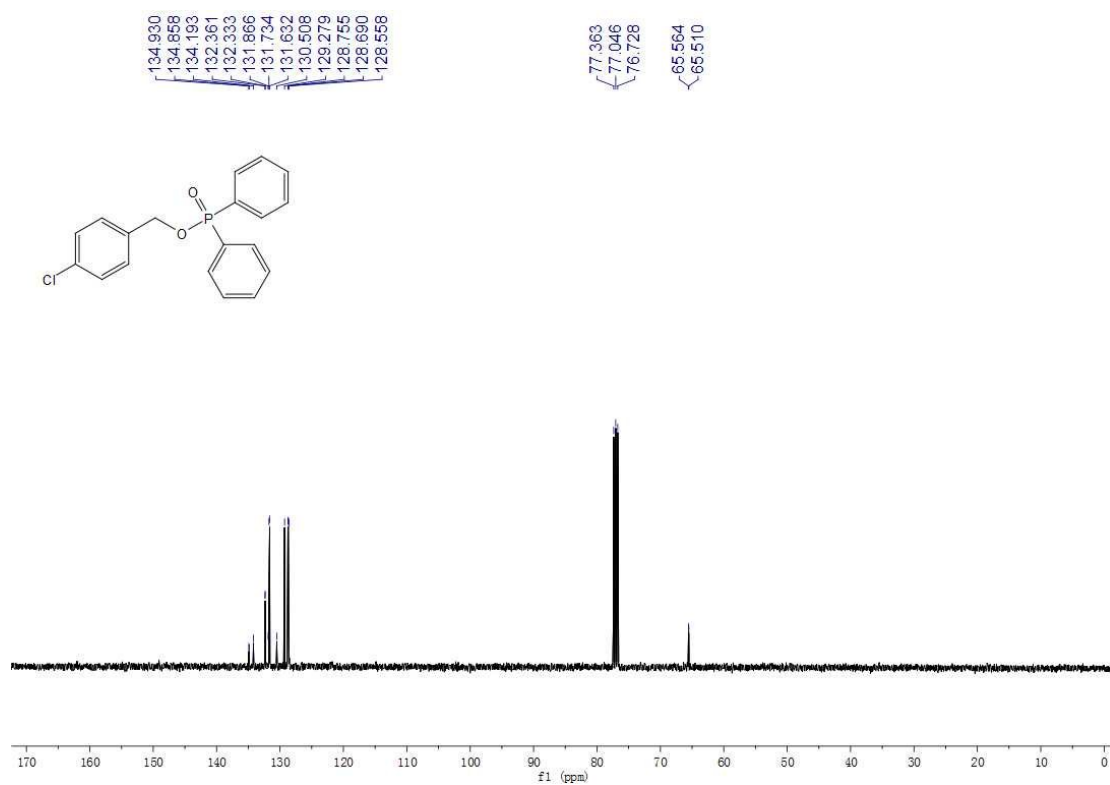

Figure 60.  $3t$ - $^{13}\text{C}$  NMR

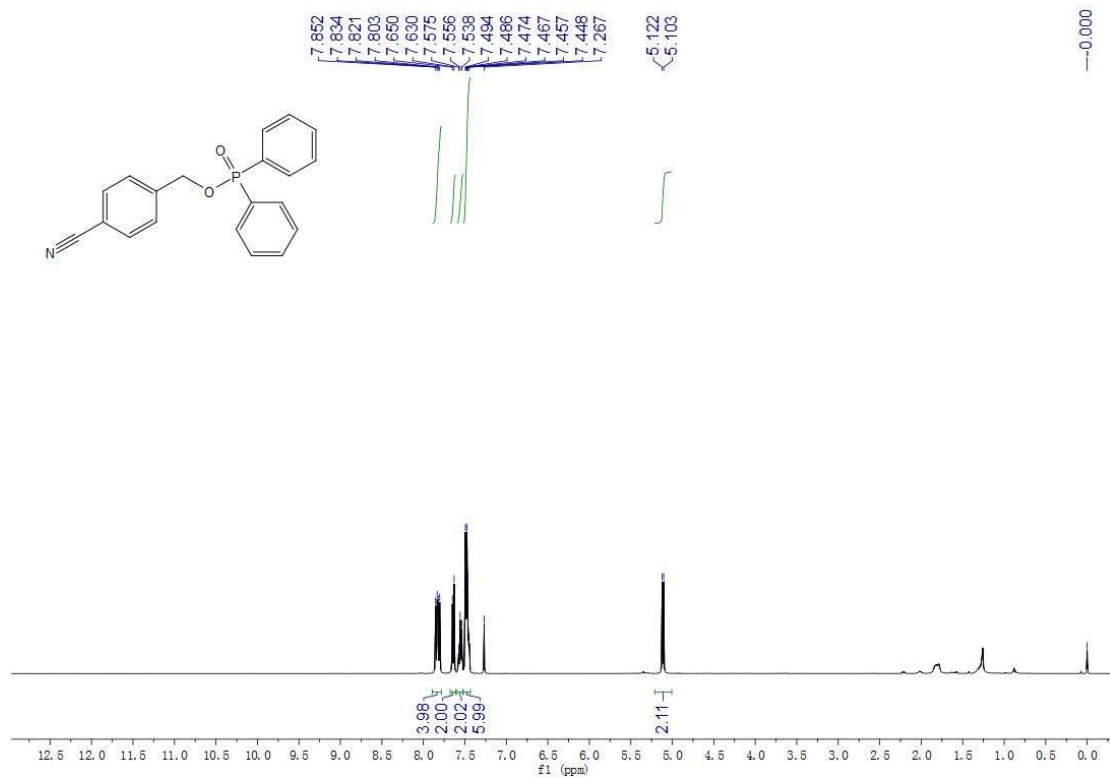

Figure 61.  $^3\text{u-}^1\text{H}$  NMR

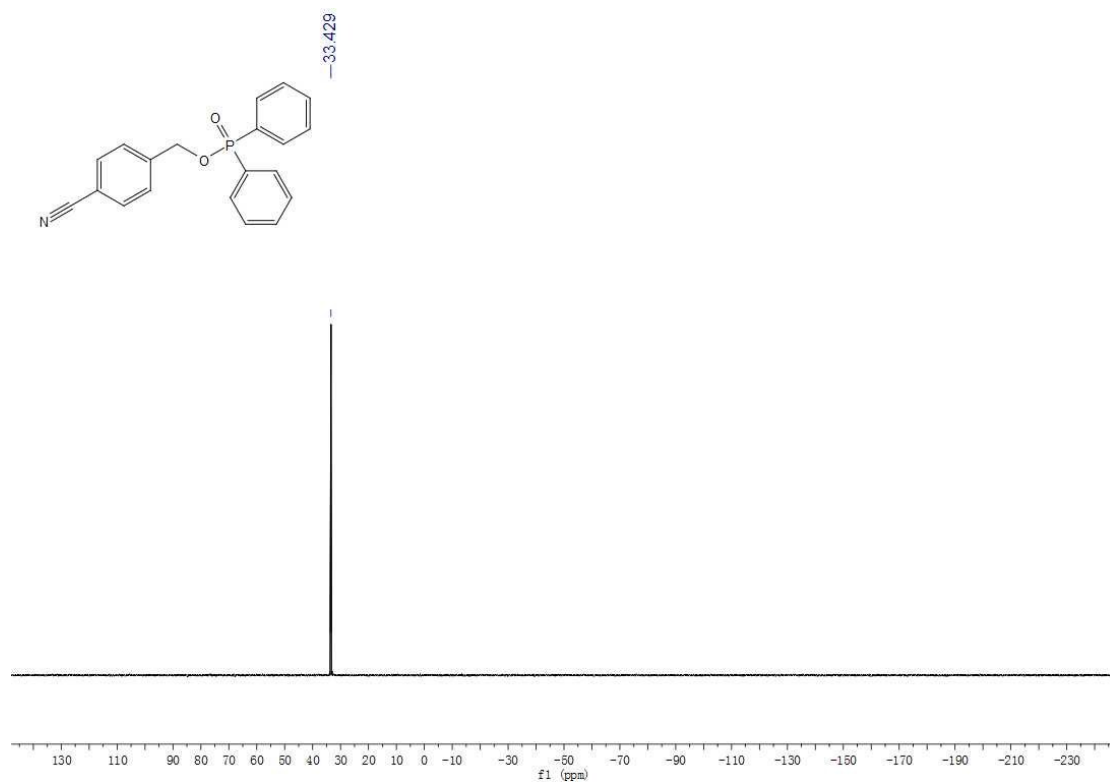

Figure 62.  $^3\text{u-}^{31}\text{P}$  NMR

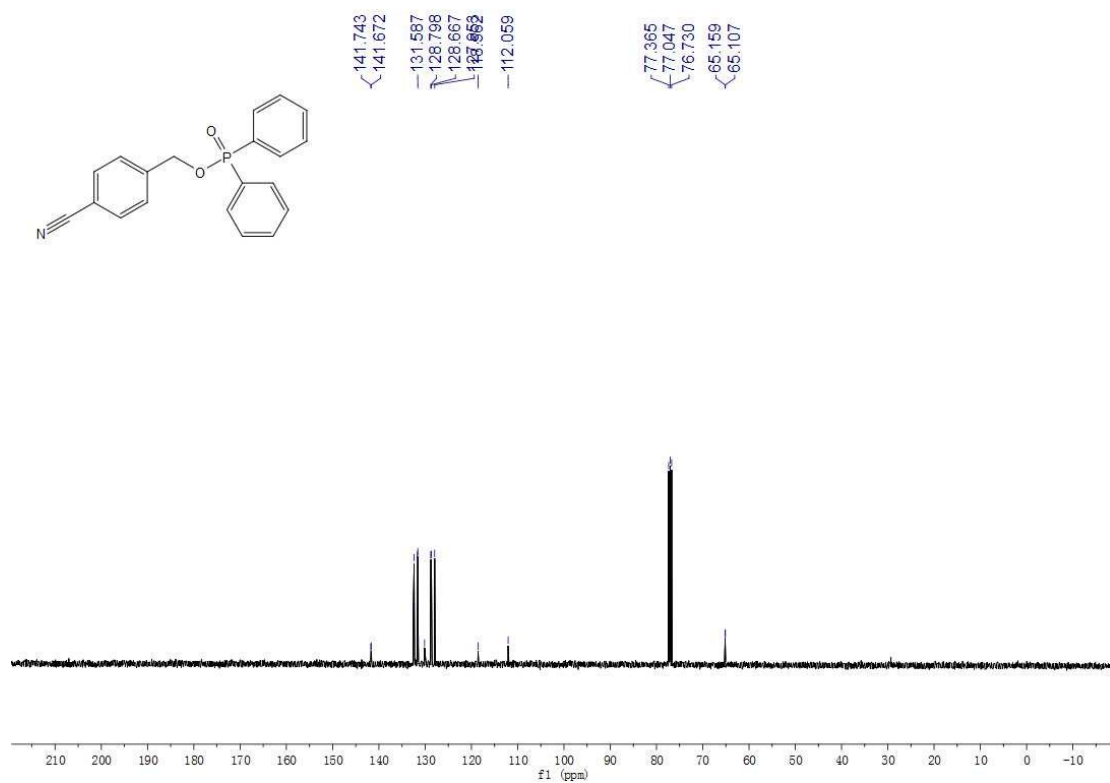

Figure 63.  $3u$ - $^{13}\text{C}$  NMR

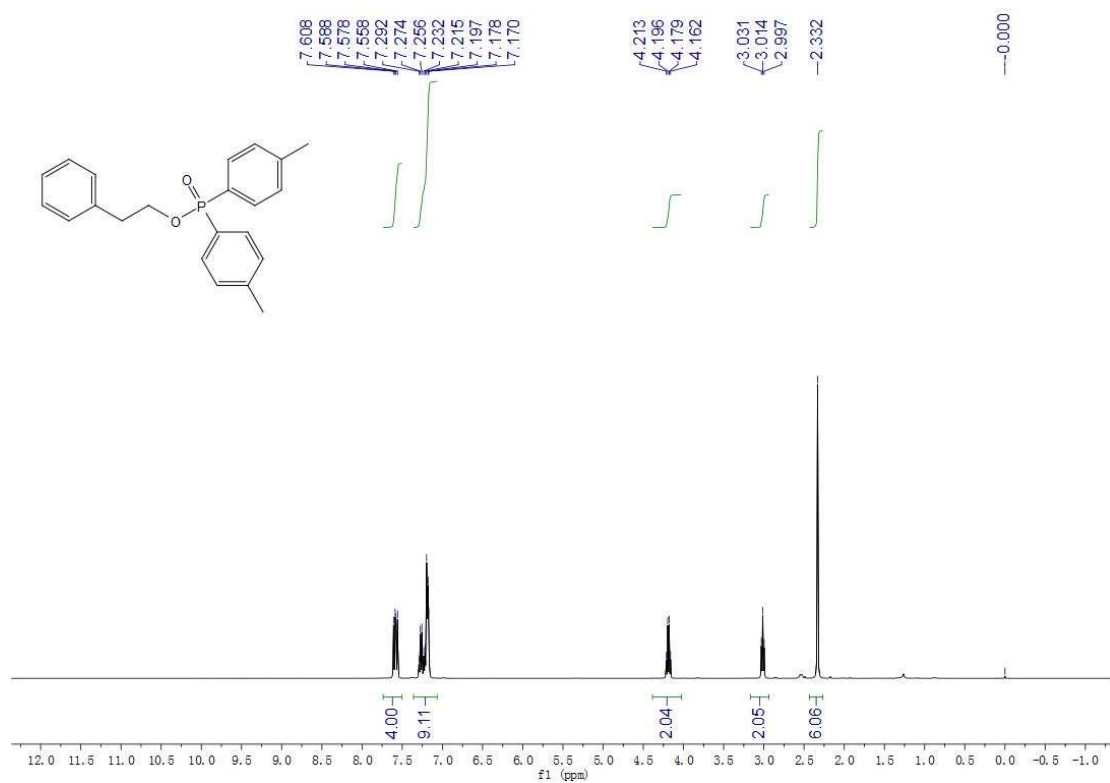

Figure 64.  $3v$ - $^1\text{H}$  NMR



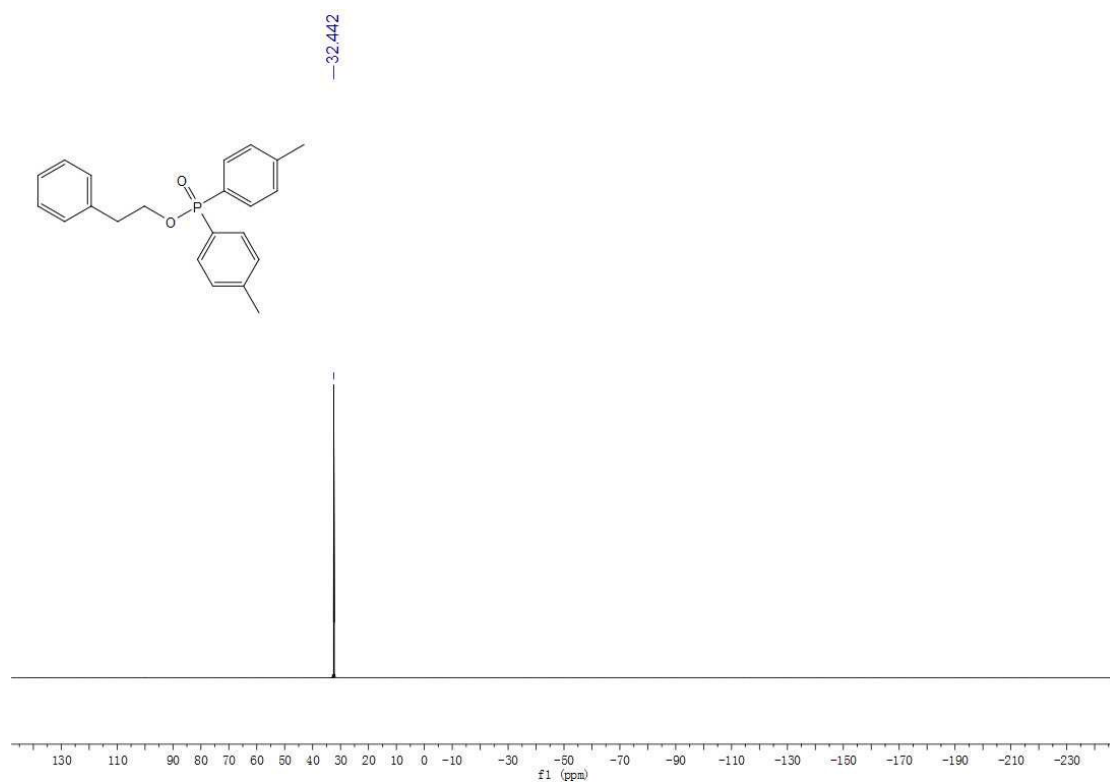

Figure 65.  $3\nu$ - $^{31}\text{P}$  NMR

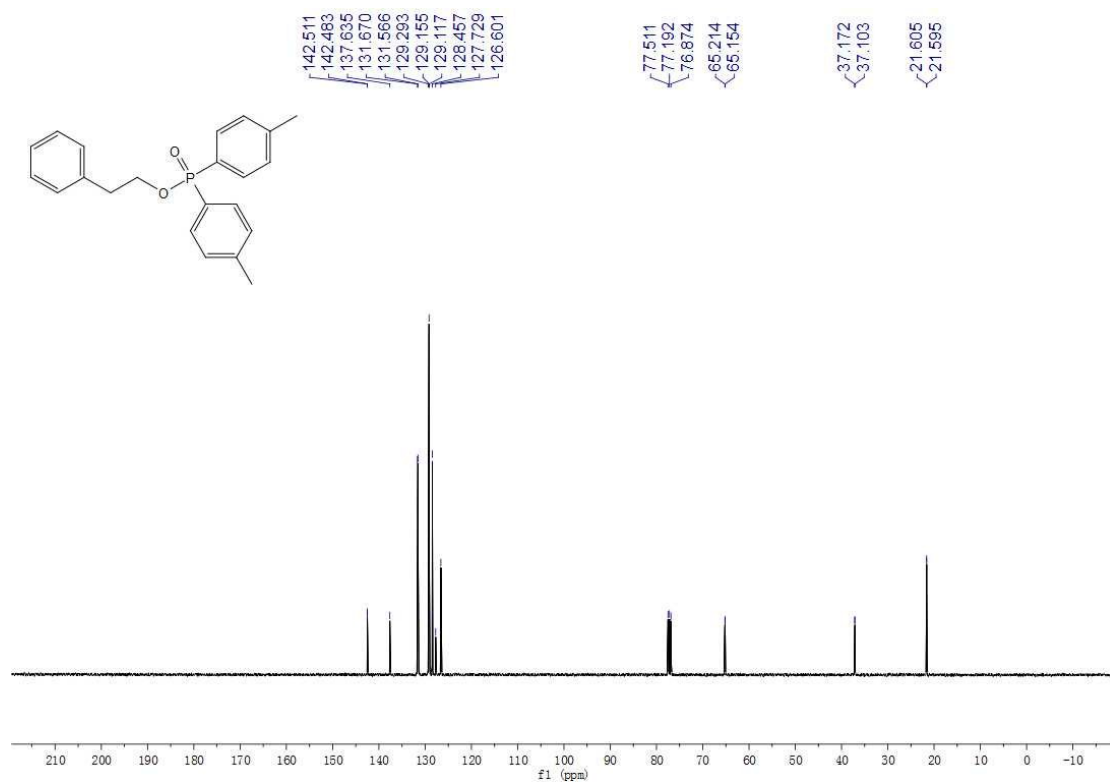

Figure 66.  $3\nu$ - $^{13}\text{C}$  NMR

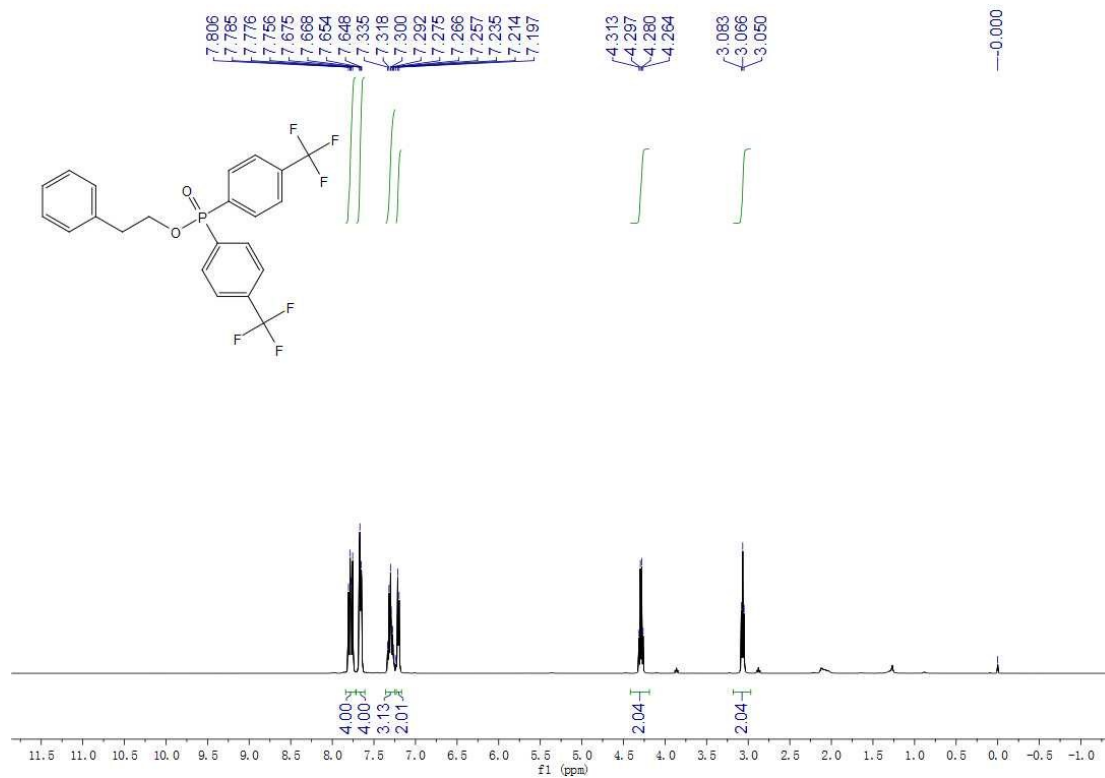

Figure 67. 3w-<sup>1</sup>H NMR

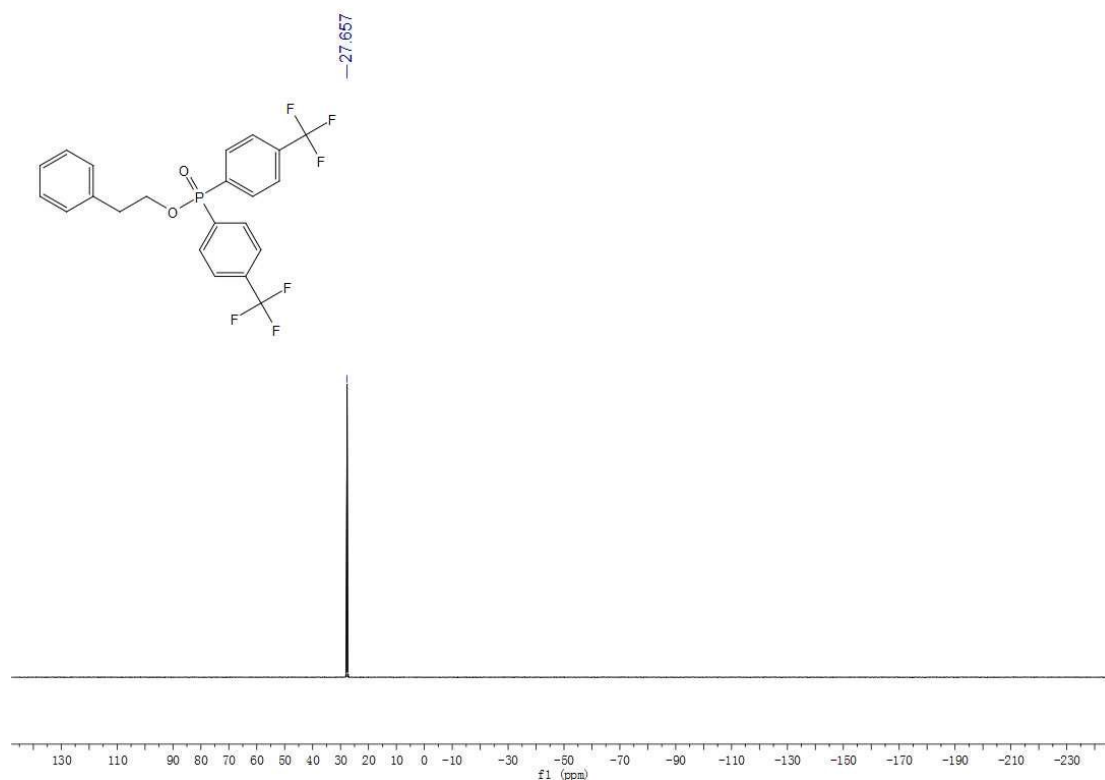

Figure 68. 3w-<sup>31</sup>P NMR

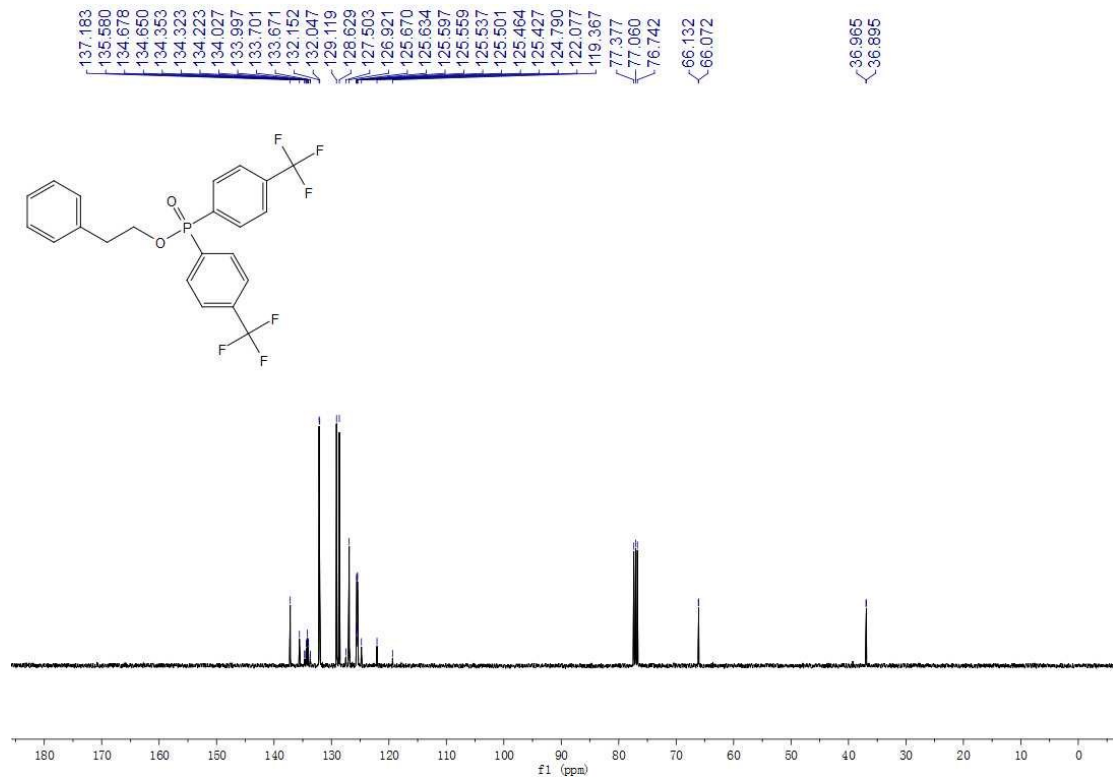

Figure 69.  $3\text{w-}^{13}\text{C}$  NMR

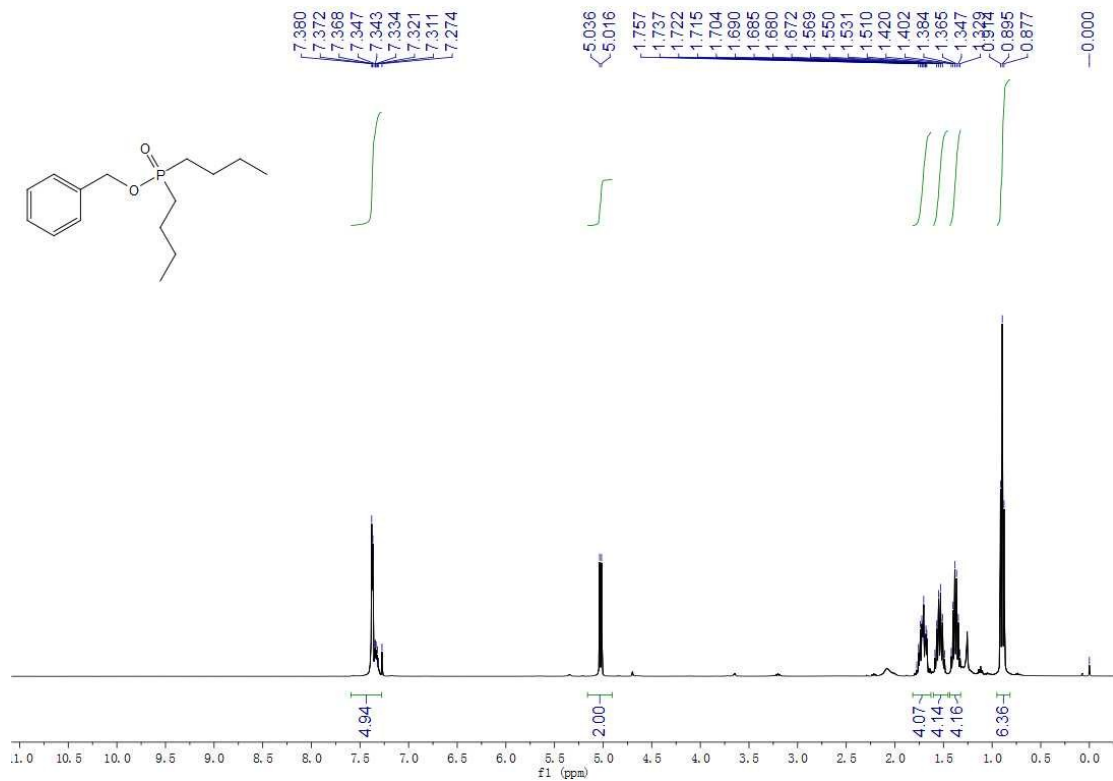

Figure 70.  $3\text{x-}^1\text{H}$  NMR

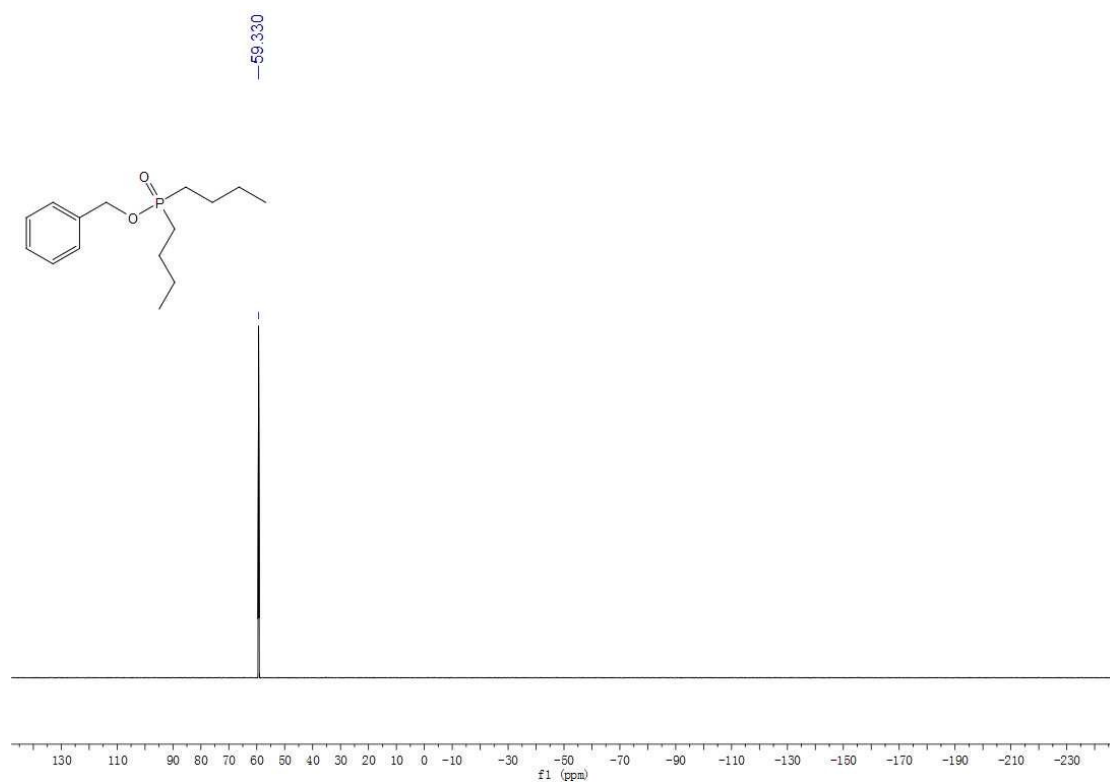

Figure 71.  $3x$ - $^{31}\text{P}$  NMR

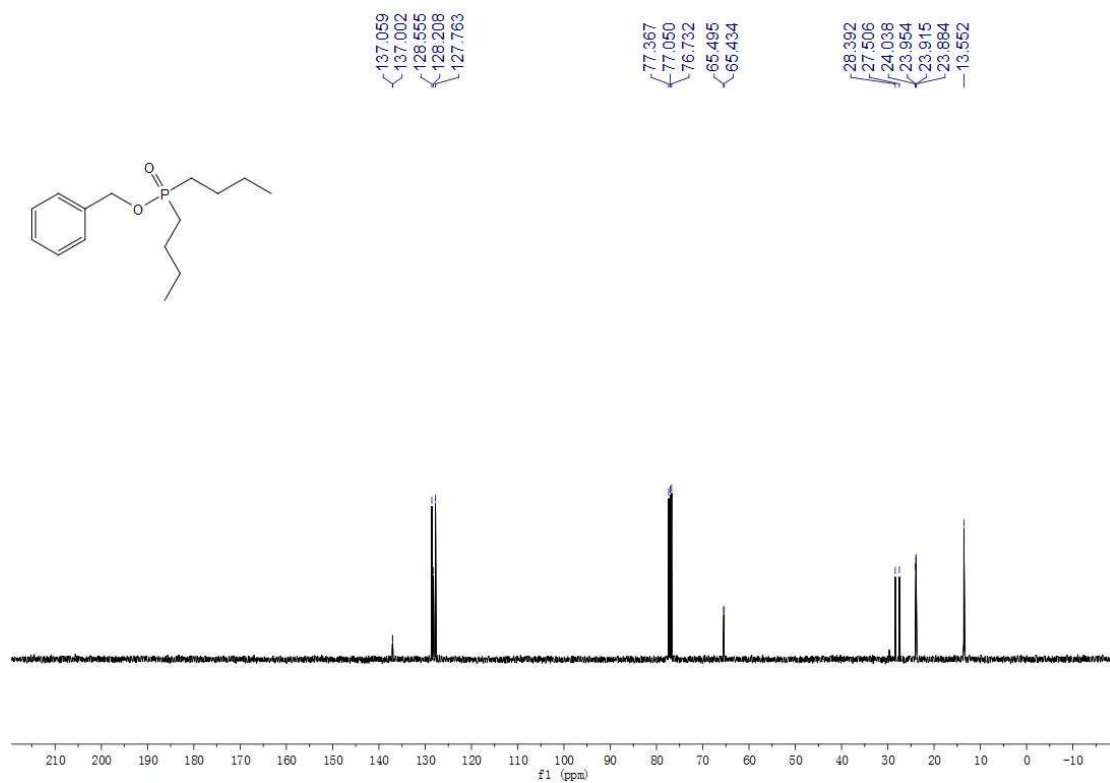

Figure 72.  $3x$ - $^{13}\text{C}$  NMR

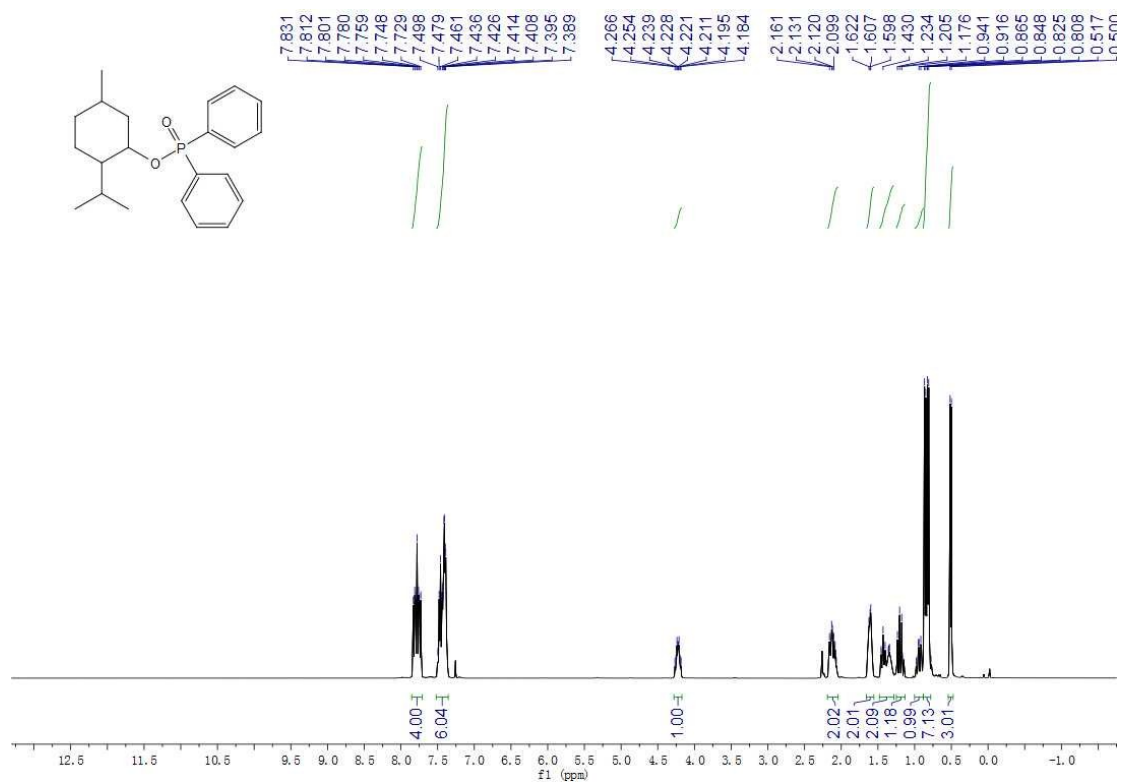

Figure 73. <sup>3</sup>y-<sup>1</sup>H NMR

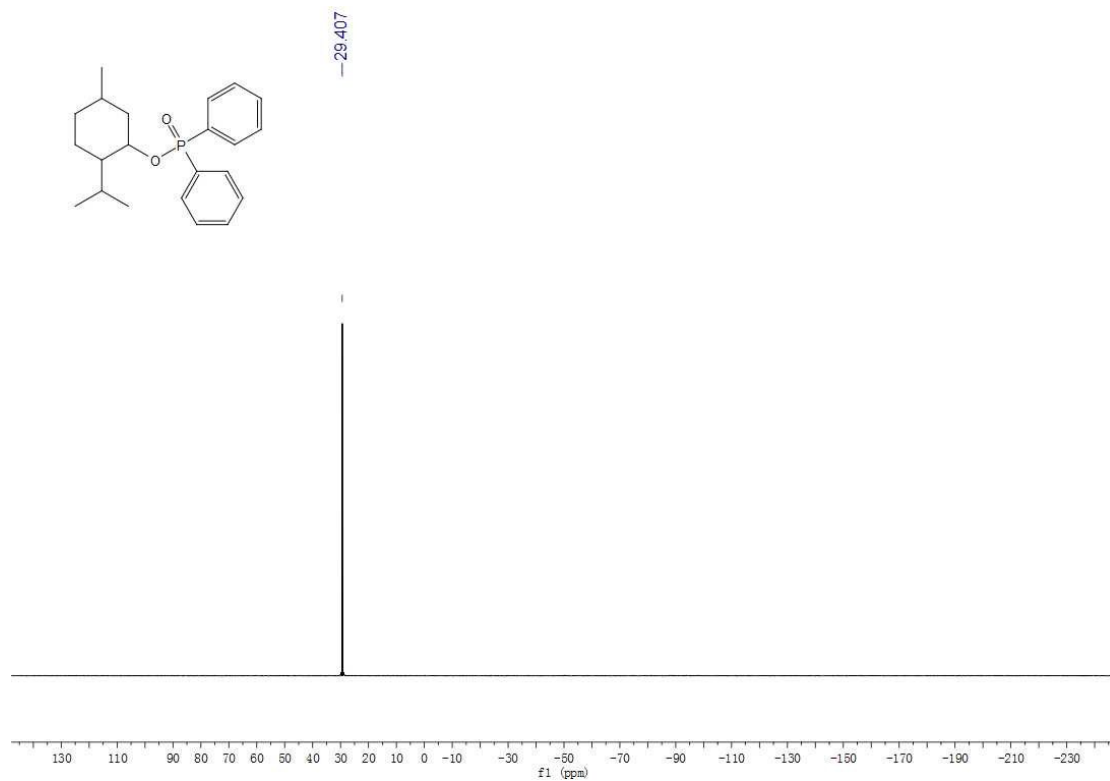

Figure 74. <sup>3</sup>y-<sup>31</sup>P NMR

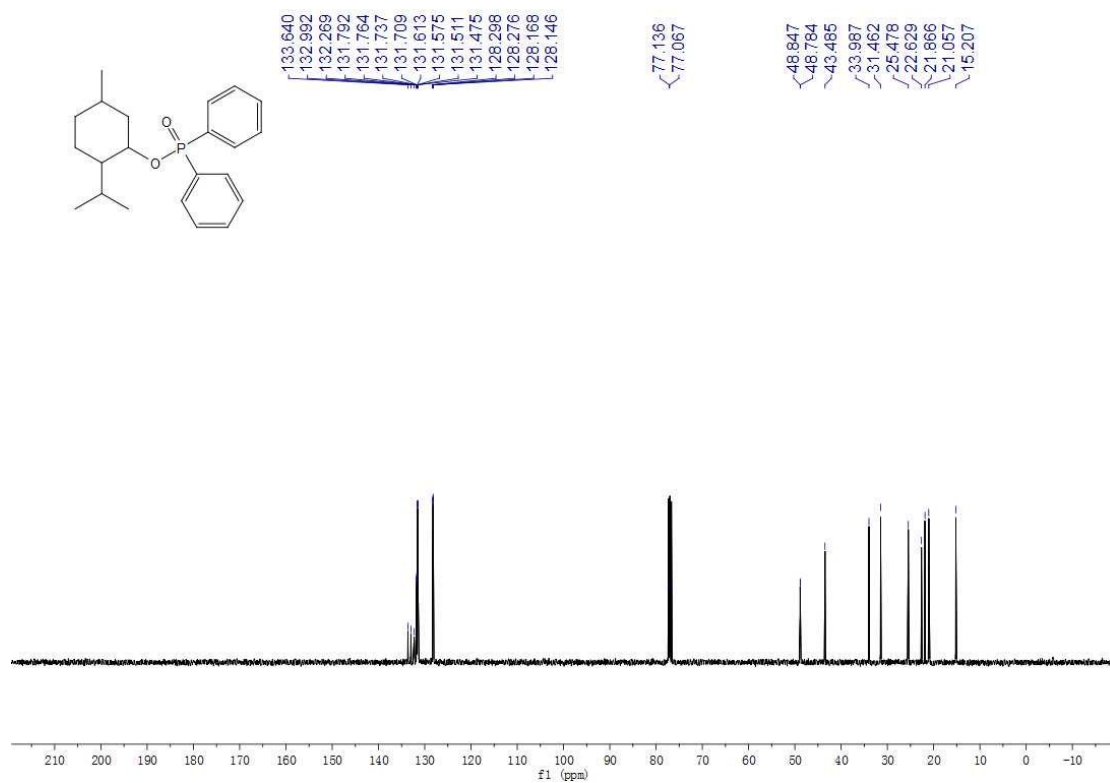

Figure 75. 3y-<sup>13</sup>C NMR

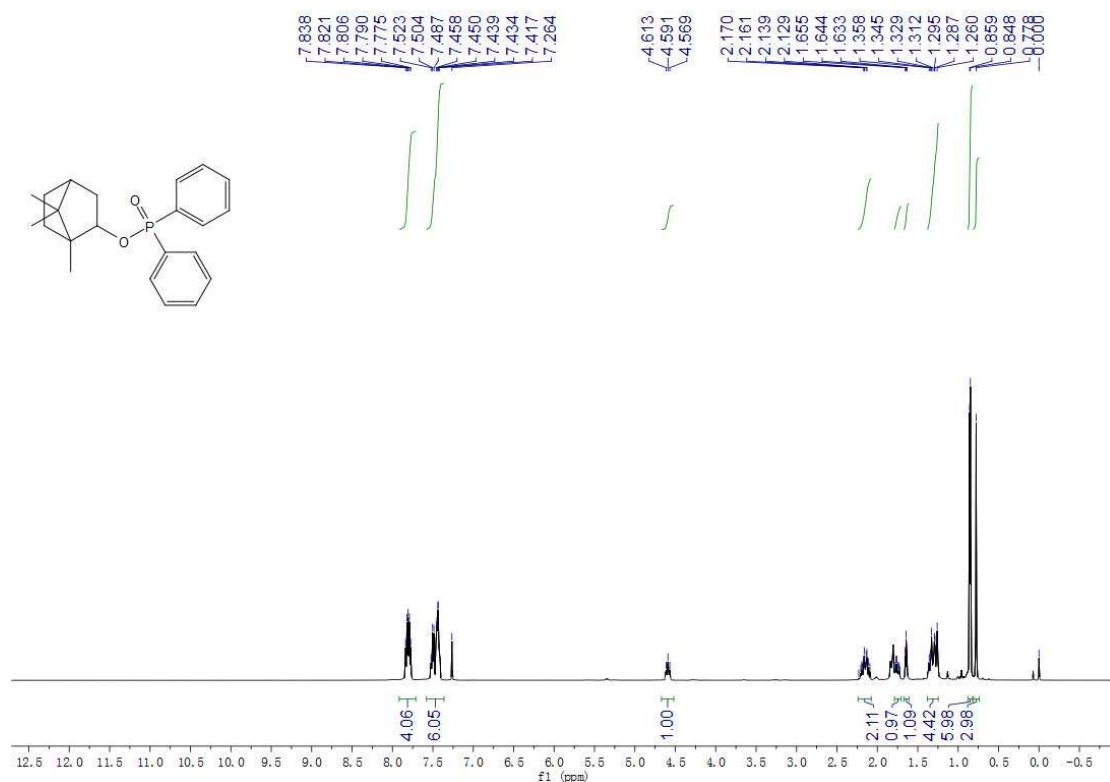

Figure 76. 3z-<sup>1</sup>H NMR

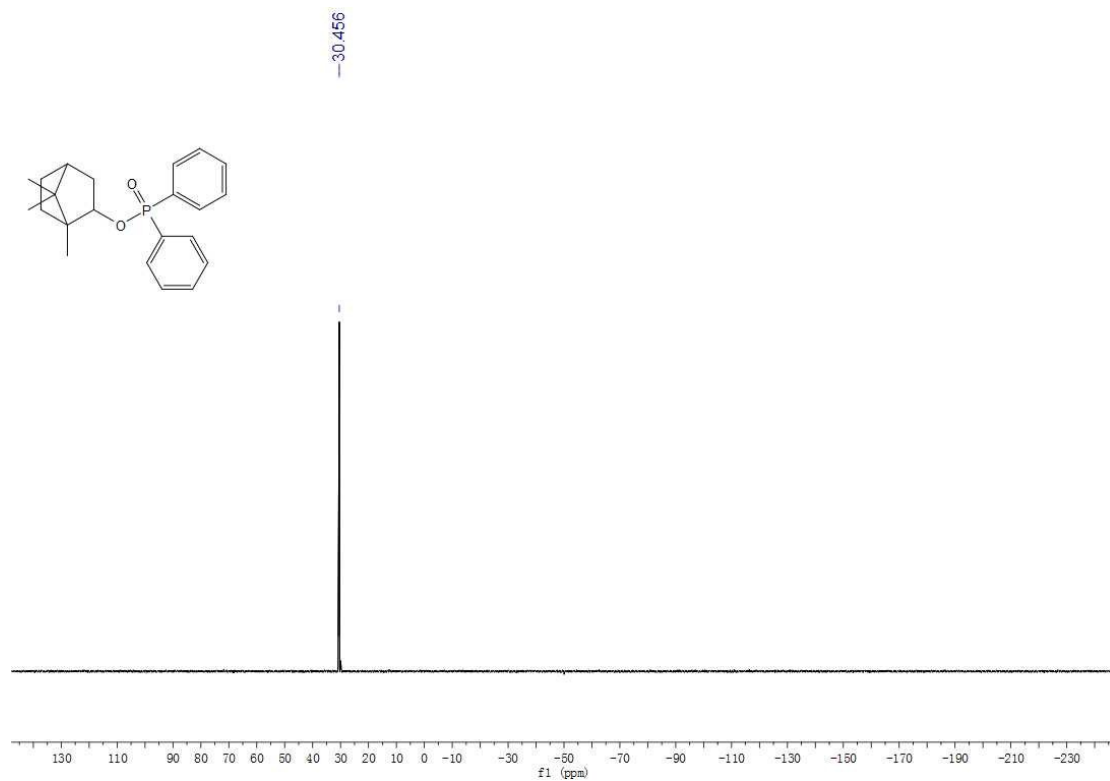

Figure 77.  $3z$ - $^{31}\text{P}$  NMR

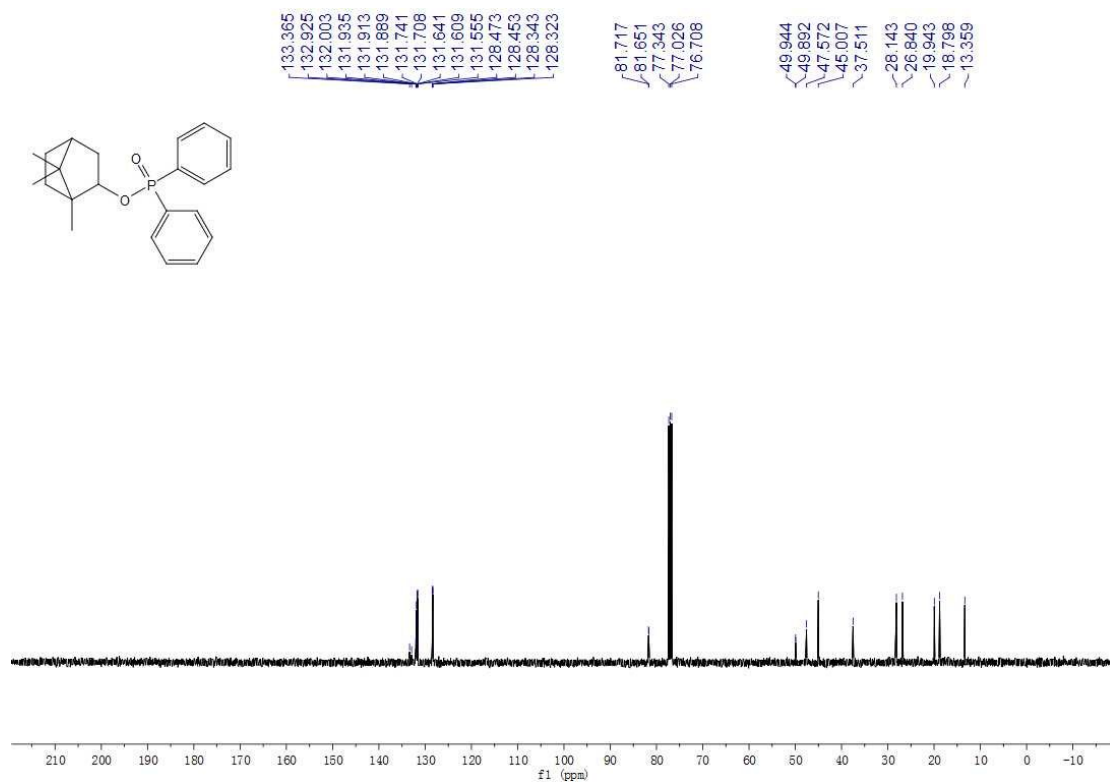

Figure 78.  $3z$ - $^{13}\text{C}$  NMR

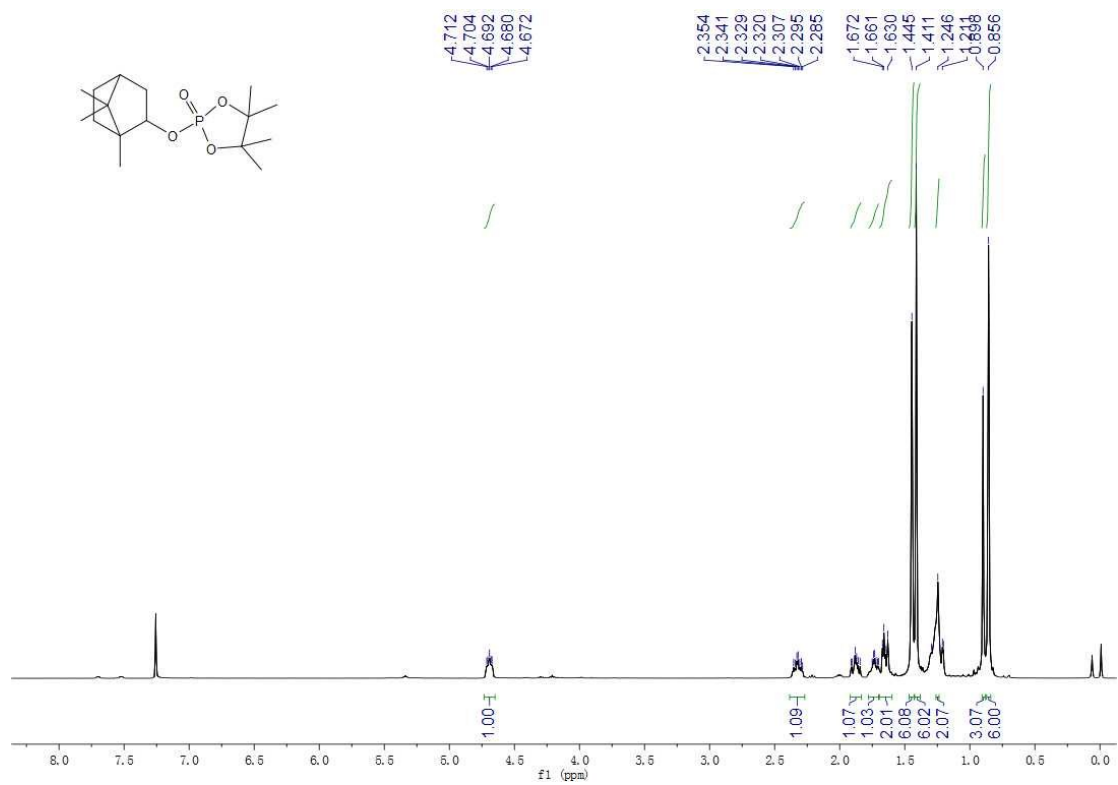

Figure 79. 3aa-<sup>1</sup>H NMR

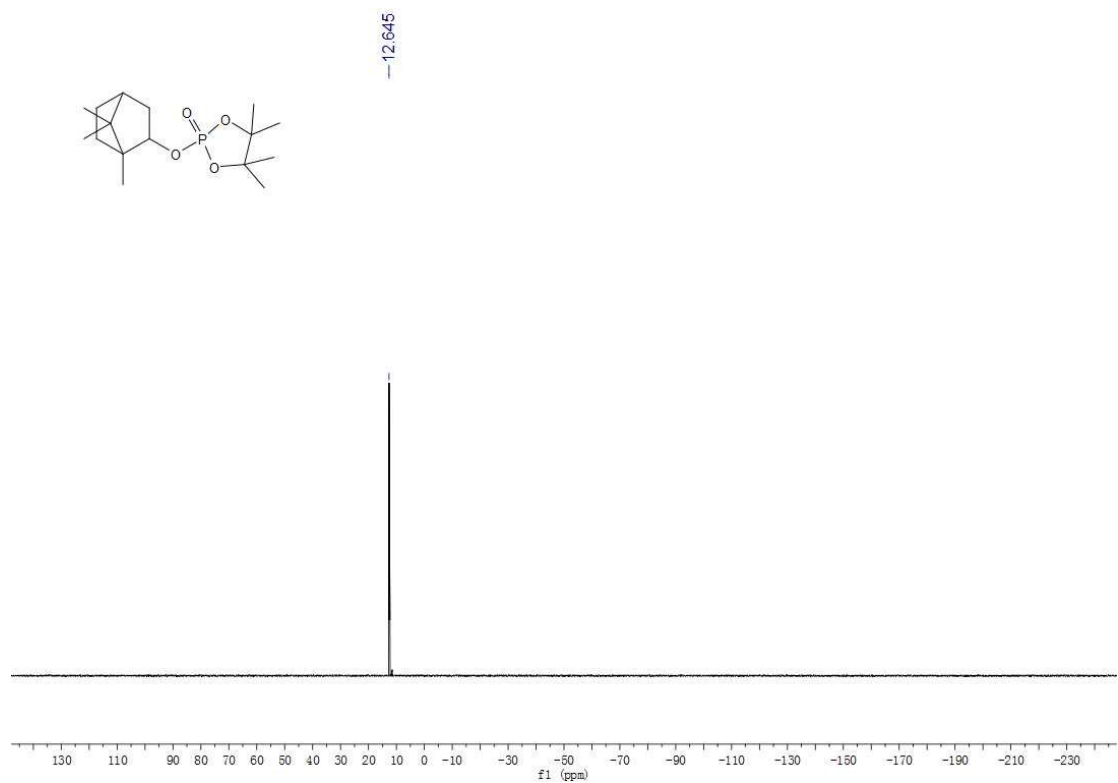

Figure 80. 3aa-<sup>31</sup>P NMR



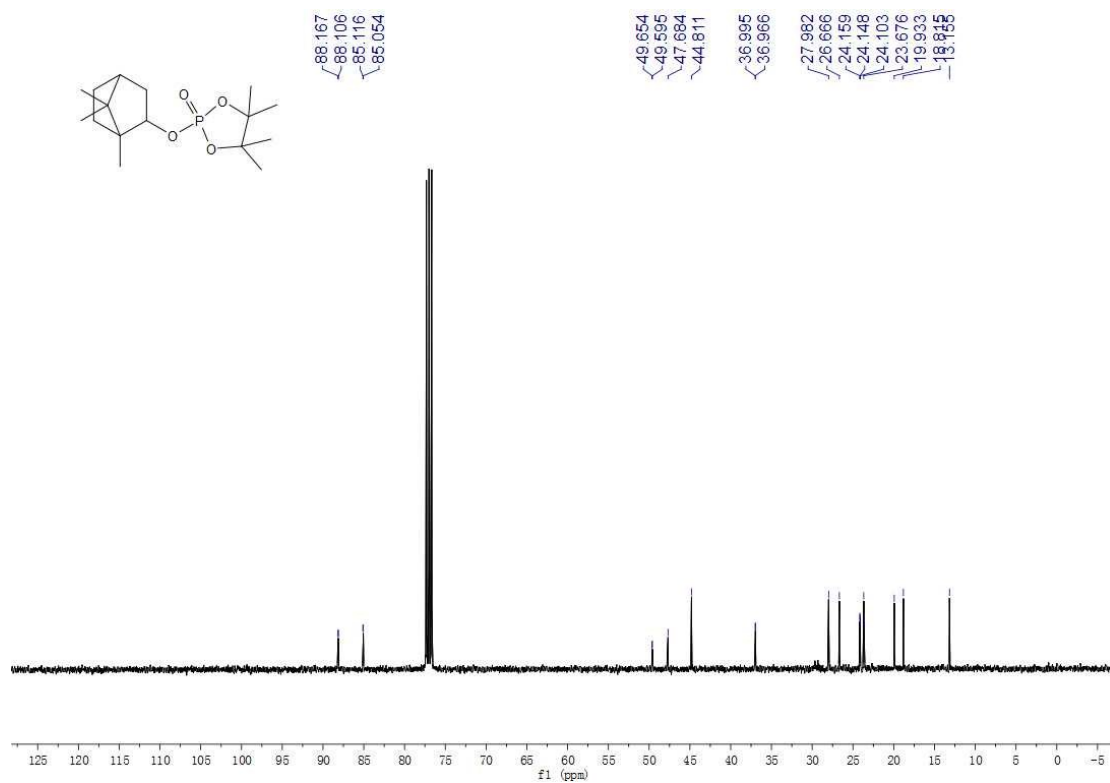

Figure 81. 3aa-<sup>13</sup>C NMR
